# Supplementary material for: leBIBIQBPP: a set of databases and a webtool for automatic phylogenetic analysis of prokaryotic sequences
Source: PubMed Central journal article supplement (PMC4531848; doi:10.1186/s12859-015-0692-z), 2015-08-12
Supplement: 12859_2015_692_MOESM4_ESM.pdf [file 12859_2015_692_MOESM4_ESM.pdf]

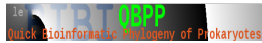
[in short](#)
[How-to](#)
[Cite](#)
[Tests sets](#)
[Databases](#)
[Contact us](#)
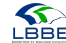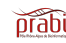

## lebib Quick BioInformatic Phylogeny of Prokaryotes

### Summary of the methods and database used during this session

Analysis Extraction of similar sequences for ingroup sequences: Query  
 There are 44 sequences in your batch  
 BLAST using the procaryota\_SSU-rDNA-16S\_TS-stringent database. Trying to extract 50 sequences with expect lower than 0.1  
 ALIGNMENT using mafft Options : speed oriented  
 BMGE use for alignment optimization Options :defaults parameters  
 TREE : phylogenetic tree using fasttree  
 Evolution model GTR -gamma

## RESULTS

### Results

#### Query data

Database: **procaryota\_SSU-rDNA-16S\_TS-stringent**

Note: The use of the stringent database (all the GenBank sequences for a given species) may lead to errors due to the low quality identification of some sequences, a careful analysis is necessary.

Original name of the query (from fasta) : **QRY\_water45\_16S**. leBiBI ref : ppqIvwPtL

#### Sequence composition

Length of Query sequence is : **1279**

Nucleotide Composition 307 A - 249 T - 303 C - 420 G - **0 N 0.0 % Gaps % =0.0**

GC%=0.56

#### Quality of the BLAST analysis

The number of Blast hits is **OK**

All is OK, the best BLAST hit length (**1273**) is =99.5% of the query length

#### Biodiversity level

All extracted sequences appear to belong to Bacteria and their lowest shared taxon is: Bacteria-Actinobacteria-Actinobacteridae-Actinomycetales-Micrococccineae-Microbacteriaceae-Microbacterium

**CAUTION!** One genus only in the extracted sequences. No outgroup *may* be pertinent enough for a good phylogeny. You may need to increase the number of desired sequences or use a more stringent database.

#### Phylogenetic tree analysis

Proximal Cluster ['Microbacterium\_maritipicum T AM181506']

#### ANALYSIS OF PATRISTIC DISTANCES

Microbacterium\_maritipicum T AM181506 is the closest sequence based on patristic distances

On the basis of patristic Distances, the **closest** sequence is: Microbacterium\_maritipicum T AM181506 AND is in the proximal cluster

No statistics available for patristic distances between members of the species of the closest sequence

Remark: the patristic distance to Microbacterium\_maritipicum T AM181506 is in the 75th percentile of the Microbacterium genus inter-species patristic distances : the sequence may correspond to a member of this genus

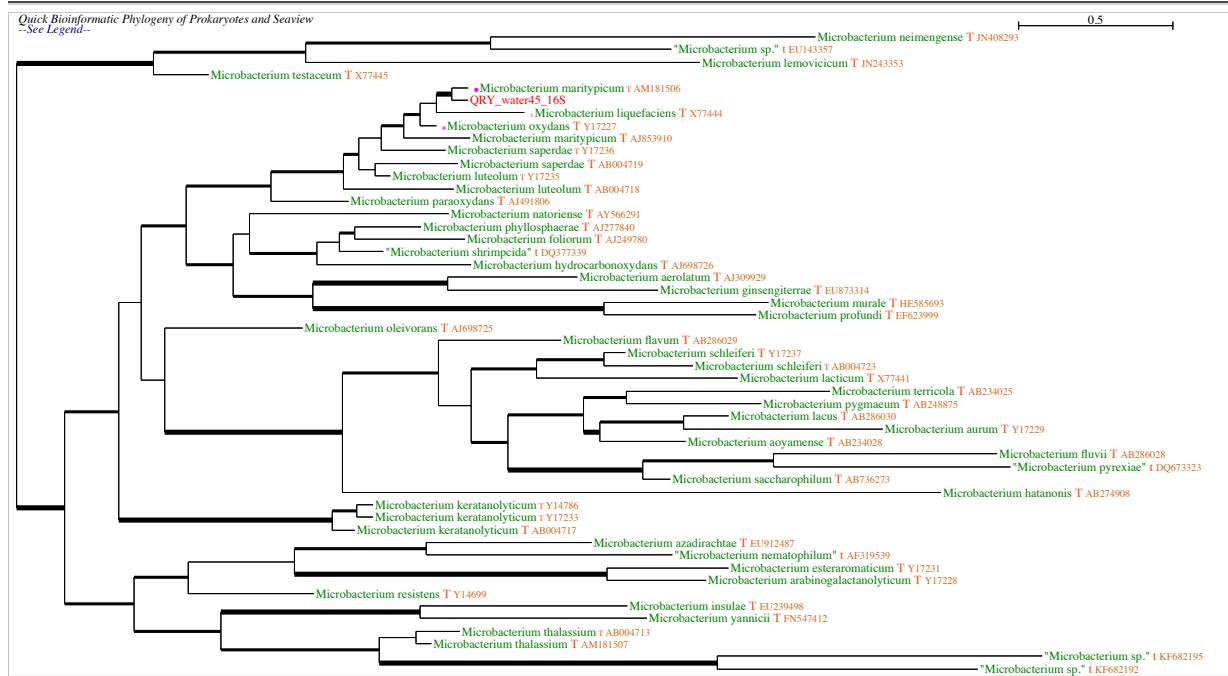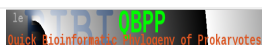
[in short](#)
[How-to](#)
[Cite](#)
[Tests sets](#)
[Databases](#)
[Contact us](#)
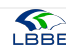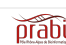

## lebib Quick BioInformatic Phylogeny of Prokaryotes

### Summary of the methods and database used during this session

Analysis Extraction of similar sequences for ingroup sequences: Query  
 There are 44 sequences in your batch  
 BLAST using the procaryota\_SSU-rDNA-16S\_TS-stringent database. Trying to extract 50 sequences with expect lower than 0.1  
 ALIGNMENT using mafft Options : speed oriented  
 BMGE use for alignment optimization Options :defaults parameters  
 TREE : phylogenetic tree using fasttree  
 Evolution model GTR -gamma

## RESULTS

### Results

#### Query data

Database: **procaryota\_SSU-rDNA-16S\_TS-stringent**

Note: The use of the stringent database (all the GenBank sequences for a given species) may lead to errors due to the low quality identification of some sequences, a careful analysis is necessary.

Original name of the query (from fasta) : **QRY\_water46\_16S**. leBiBI ref : ppqIvwPtL

#### Sequence composition

Length of Query sequence is : **1280**

Nucleotide Composition 317 A - 245 T - 305 C - 413 G - **0 N 0.0 % Gaps % =0.0**

GC%=0.56

#### Quality of the BLAST analysis

The number of Blast hits is **OK**

All is OK, the best BLAST hit length (**1280**) is =100.% of the query length

#### Biodiversity level

All extracted sequences appear to belong to Bacteria and their lowest shared taxon is: Bacteria-Actinobacteria-Actinobacteridae-Actinomycetales-Micrococineae-Microbacteriaceae-Microbacterium

**CAUTION!** One genus only in the extracted sequences. No outgroup *may* be pertinent enough for a good phylogeny. You may need to increase the number of desired sequences or use a *more stringent database*.

#### Phylogenetic tree analysis

Proximal Cluster [**'Microbacterium\_lacticum T X77441'**]

#### ANALYSIS OF PATRISTIC DISTANCES

Microbacterium\_lacticum T X77441 is the closest sequence based on patristic distances

On the basis of patristic Distances, the **closest** sequence is: Microbacterium\_lacticum T X77441 AND is in the proximal cluster

No statistics available for patristic distances between members of the species of the closest sequence

Remark: the patristic distance to Microbacterium\_lacticum T X77441 is in the 75th percentile of the Microbacterium genus inter-species patristic distances : the sequence may correspond to a member of this genus

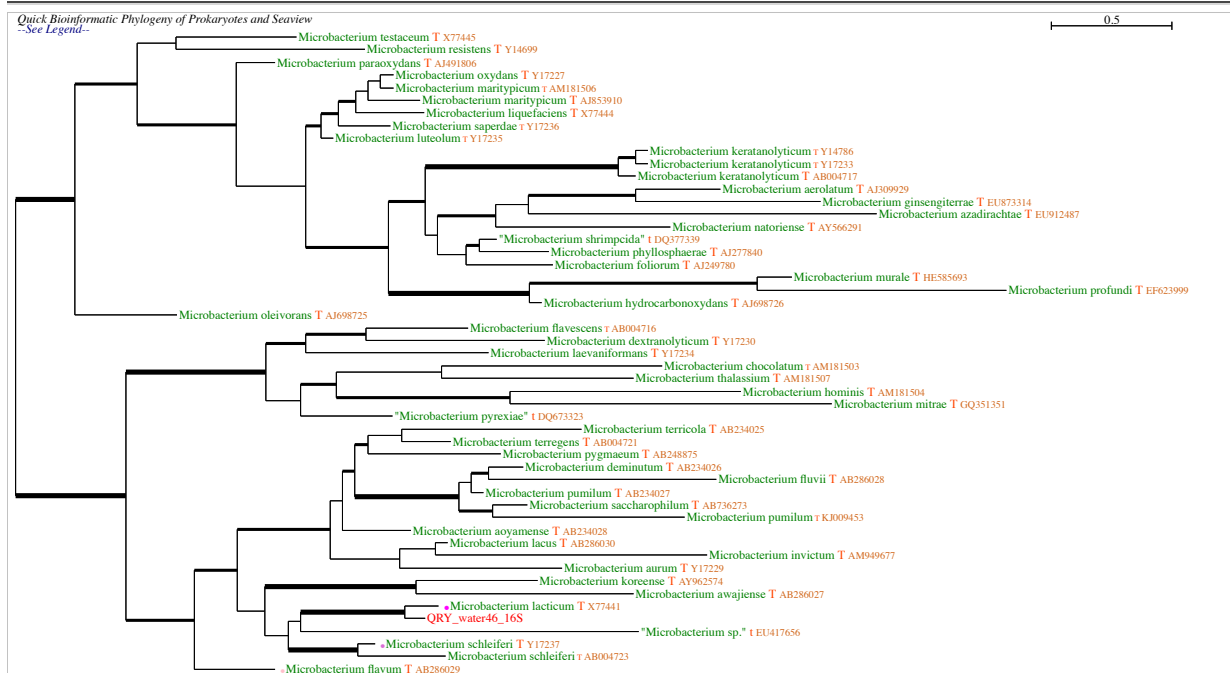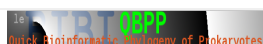

[in short](#)

[How-to](#)

[Cite](#)

[Tests sets](#)

[Databases](#)

[Contact us](#)

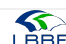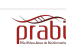

## lebibi Quick BioInformatic Phylogeny of Prokaryotes

### Summary of the methods and database used during this session

Analysis Extraction of similar sequences for ingroup sequences: Query  
 There are 44 sequences in your batch  
 BLAST using the procaryota\_SSU-rDNA-16S\_TS-stringent database. Trying to extract 50 sequences with expect lower than 0.1  
 ALIGNMENT using mafft Options : speed oriented  
 BMGE use for alignment optimization Options :defaults parameters  
 TREE : phylogenetic tree using fasttree  
 Evolution model GTR -gamma

## RESULTS

### Results

#### Query data

Database: **procaryota\_SSU-rDNA-16S\_TS-stringent**

Note: The use of the stringent database (all the GenBank sequences for a given species) may lead to errors due to the low quality identification of some sequences, a careful analysis is necessary.

Original name of the query (from fasta) : **QRY\_water47\_16S**. leBiBI ref : ppqIvwPtL

#### Sequence composition

Length of Query sequence is : **1267**

Nucleotide Composition 300 A - 253 T - 298 C - 416 G - **0 N 0.0 % Gaps % =0.0**

GC%=0.56

#### Quality of the BLAST analysis

The number of Blast hits is **OK**

All is OK, the best BLAST hit length (1267) is =100.% of the query length

#### Biodiversity level

All extracted sequences appear to belong to Bacteria and their lowest shared taxon is: Bacteria-Actinobacteria-Actinobacteridae-Actinomycetales-Micrococccineae-Microbacteriaceae-Microbacterium

**CAUTION!** One genus only in the extracted sequences. No outgroup *may* be pertinent enough for a good phylogeny. You may need to increase the number of desired sequences or use a *more stringent database*.

#### Phylogenetic tree analysis

Proximal Cluster ['Microbacterium\_hydrothermale T HM222660', 'Microbacterium\_takaensis ? T AB201047']

#### ANALYSIS OF PATRISTIC DISTANCES

Microbacterium\_takaensis ? T AB201047 is the closest sequence based on patristic distances

On the basis of patristic Distances, the closest TS sequence is: Microbacterium\_trichohecenolyticum T Y17240 AND is NOT in the proximal cluster

The closest sequence has not the same species name as the closest TS

No statistics available for patristic distances between members of the species of the closest sequence

Remark: the patristic distance to Microbacterium\_takaensis ? T AB201047 is in the 75th percentile of the Microbacterium genus inter-species patristic distances : the sequence may correspond to a member of this genus

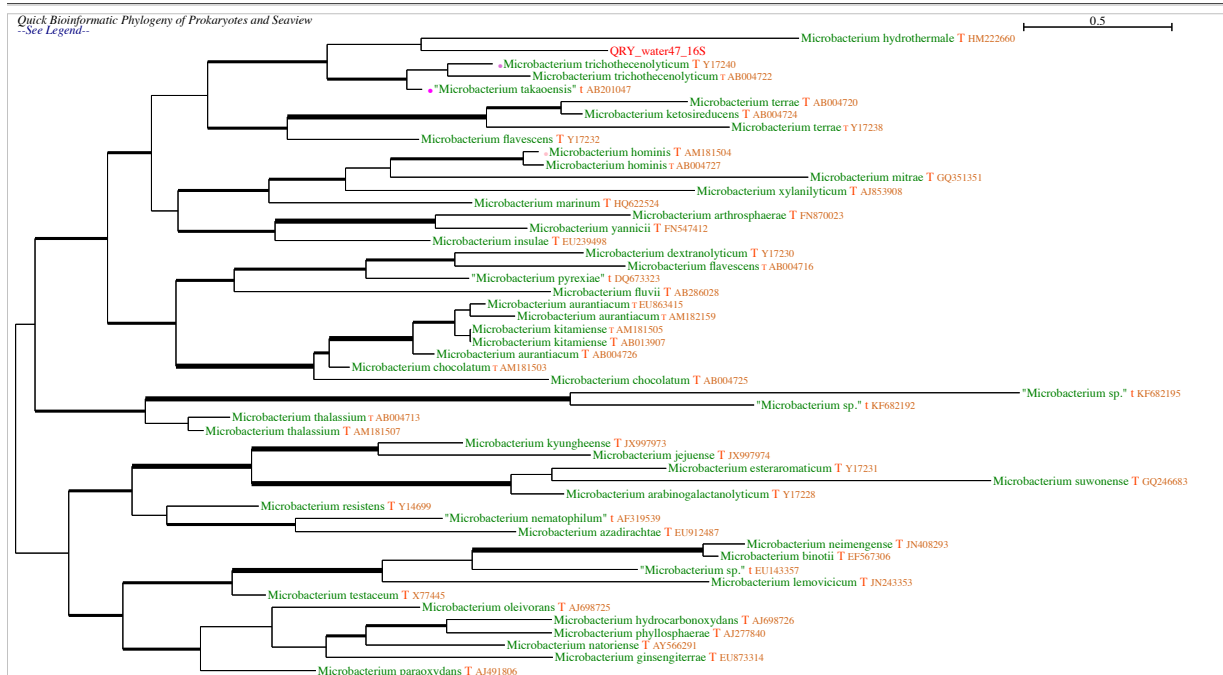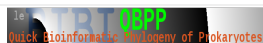

[in short](#)

[How-to](#)

[Cite](#)

[Tests sets](#)

[Databases](#)

[Contact us](#)

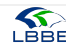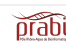

## lebibi Quick BioInformatic Phylogeny of Prokaryotes

### Summary of the methods and database used during this session

Analysis Extraction of similar sequences for ingroup sequences: Query

There are 44 sequences in your batch

BLAST using the procaryota\_SSU-rDNA-16S\_TS-stringent database. Trying to extract 50 sequences with expect lower than 0.1

ALIGNMENT using mafft Options : speed oriented

BMGE use for alignment optimization Options :defaults parameters

TREE : phylogenetic tree using fasttree

Evolution model GTR -gamma

## RESULTS

**Results****Query data**Database: **procaryota\_SSU-rDNA-16S\_TS-stringent**

Note: The use of the stringent database (all the GenBank sequences for a given species) may lead to errors due to the low quality identification of some sequences, a careful analysis is necessary.

Original name of the query (from fasta) : **QRY\_water48\_16S**, leBiBI ref : ppqIvwPtL**Sequence composition**Length of Query sequence is : **1233**Nucleotide Composition 292 A - 245 T - 295 C - 401 G - **0 N 0.0 % Gaps % =0.0**

GC%=0.56

**Quality of the BLAST analysis**The number of Blast hits is **OK**All is OK, the best BLAST hit length (**1233**) is =100.% of the query length**Biodiversity level**All extracted sequences appear to belong to Bacteria and their lowest shared taxon is: Bacteria-Proteobacteria-Alphaproteobacteria-Rhizobiales-Methylobacteriaceae-Methylobacterium **CAUTION!** One genus only in the extracted sequences. No outgroup *may* be pertinent enough for a good phylogeny. You may need to increase the number of desired sequences or use a *more stringent database*.**Phylogenetic tree analysis**

Proximal Cluster ['Methylobacterium\_thiocyanatum T AB175646', 'Methylobacterium\_thiocyanatum T U58018', 'Methylobacterium\_rhodesianum T AB175643', 'Methylobacterium\_rhodesianum T AB175642']

**ANALYSIS OF PATRISTIC DISTANCES**

Methylobacterium\_thiocyanatum T AB175646 is the closest sequence based on patristic distances

On the basis of patristic Distances, the **closest** sequence is: Methylobacterium\_thiocyanatum T AB175646 AND is in the proximal cluster**No statistics available for patristic distances between members of the species of the closest sequence**

Remark: the patristic distance to Methylobacterium\_thiocyanatum T AB175646 is in the 75th percentile of the Methylobacterium genus inter-species patristic distances : the sequence may correspond to a member of this genus

**The closest sequence based on patristic distances (Methylobacterium\_thiocyanatum T AB175646) is NOT the FIRST BLAST hit.**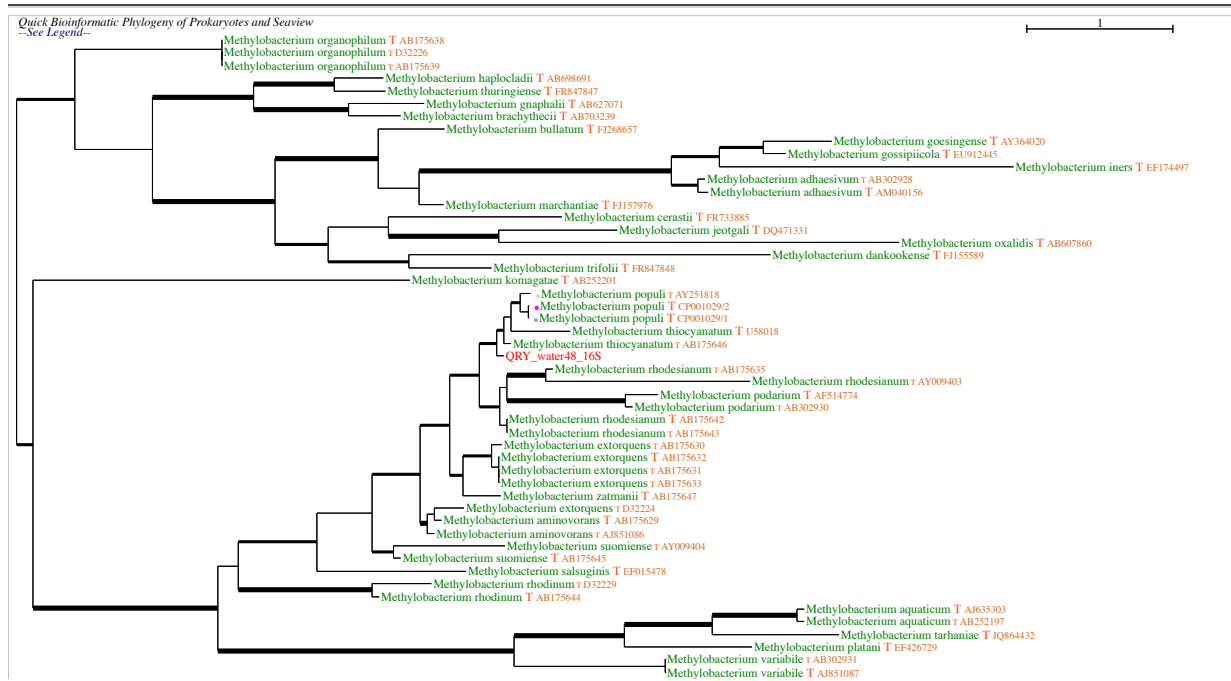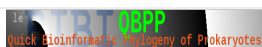[in short](#)[How-to](#)[Cite](#)[Tests sets](#)[Databases](#)[Contact us](#)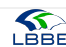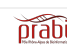**lebib Quick BioInformatic Phylogeny of Prokaryotes****Summary of the methods and database used during this session**

Analysis Extraction of similar sequences for ingroup sequences: Query

There are 44 sequences in your batch

BLAST using the procaryota\_SSU-rDNA-16S\_TS-stringent database. Trying to extract 50 sequences with expect lower than 0.1

ALIGNMENT using mafft Options : speed oriented

BMGE use for alignment optimization Options :defaults parameters

TREE : phylogenetic tree using fasttree

Evolution model GTR -gamma

**RESULTS**

**Results**

**Query data**

Database: **procaryota\_SSU-rDNA-16S\_TS-stringent**

Note: The use of the stringent database (all the GenBank sequences for a given species) may lead to errors due to the low quality identification of some sequences, a careful analysis is necessary.

Original name of the query (from fasta) : **QRY\_water49\_16S**, leBiBI ref : ppqIvwPtL

**Sequence composition**

Length of Query sequence is : **1269**

Nucleotide Composition 312 A - 243 T - 305 C - 409 G - **0 N 0.0 % Gaps % =0.0**

GC%=0.56

**Quality of the BLAST analysis**

The number of Blast hits is **OK**

All is OK, the best BLAST hit length (**1267**) is =99.8% of the query length

**Biodiversity level**

All extracted sequences appear to belong to Bacteria and their lowest shared taxon is: Bacteria-Actinobacteria-Actinobacteridae-Actinomycetales-Micrococccineae-Microbacteriaceae-Microbacterium

**CAUTION!** One genus only in the extracted sequences. No outgroup *may* be pertinent enough for a good phylogeny. You may need to increase the number of desired sequences or use a *more stringent database*.

**Phylogenetic tree analysis**

Proximal Cluster [**Microbacterium\_lacticum T X77441**]

**ANALYSIS OF PATRISTIC DISTANCES**

Microbacterium\_lacticum T X77441 is the closest sequence based on patristic distances

On the basis of patristic Distances, the **closest** sequence is: Microbacterium\_lacticum T X77441 AND is in the proximal cluster

No statistics available for patristic distances between members of the species of the closest sequence

Remark: the patristic distance to Microbacterium\_lacticum T X77441 is in the 75th percentile of the Microbacterium genus inter-species patristic distances : the sequence may correspond to a member of this genus

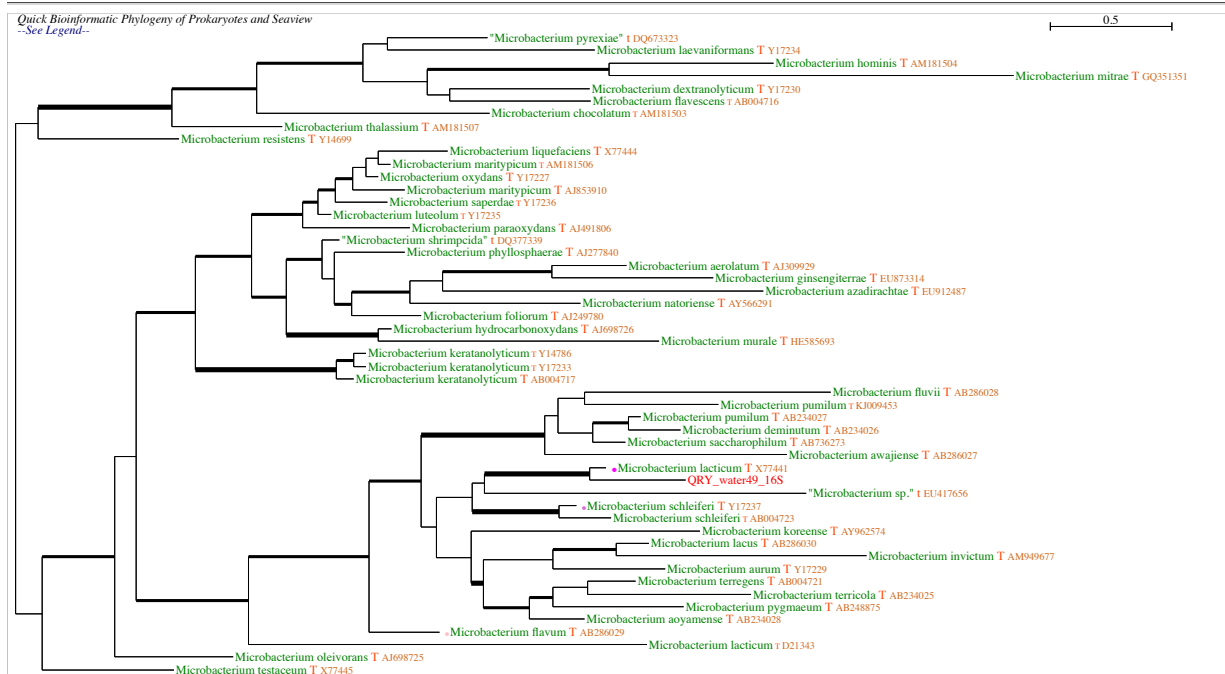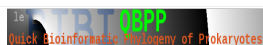

[in short](#)

[How-to](#)

[Cite](#)

[Tests sets](#)

[Databases](#)

[Contact us](#)

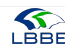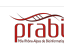

**lebibi Quick BioInformatic Phylogeny of Prokaryotes**

**Summary of the methods and database used during this session**

Analysis Extraction of similar sequences for ingroup sequences: Query

There are 44 sequences in your batch

BLAST using the procaryota\_SSU-rDNA-16S\_TS-stringent database. Trying to extract 50 sequences with expect lower than 0.1

ALIGNMENT using mafft Options : speed oriented

BMGE use for alignment optimization Options : defaults parameters

TREE : phylogenetic tree using fasttree

Evolution model GTR -gamma

**RESULTS**

**Results**

**Query data**

Database: **procaryota\_SSU-rDNA-16S\_TS-stringent**

Note: The use of the stringent database (all the GenBank sequences for a given species) may lead to errors due to the low quality identification of some sequences, a careful analysis is necessary.

Original name of the query (from fasta) : **QRY\_water50\_16S**, leBiBI ref : ppqIvwPtL

**Sequence composition**

Length of Query sequence is : **1281**

Nucleotide Composition 316 A - 245 T - 306 C - 414 G - **0 N 0.0 % Gaps % =0.0**

GC%=0.56

**Quality of the BLAST analysis**

The number of Blast hits is **OK**

All is OK, the best BLAST hit length (**1281**) is =100.% of the query length

**Biodiversity level**

All extracted sequences appear to belong to Bacteria and their lowest shared taxon is: Bacteria-Actinobacteria-Actinobacteridae-Actinomycetales-Micrococccineae-Microbacteriaceae-Microbacterium

**CAUTION!** One genus only in the extracted sequences. No outgroup *may* be pertinent enough for a good phylogeny. You may need to increase the number of desired sequences or use a *more stringent database*.

**Phylogenetic tree analysis**

Proximal Cluster [**'Microbacterium\_lacticum T X77441'**]

**ANALYSIS OF PATRISTIC DISTANCES**

Microbacterium\_lacticum T X77441 is the closest sequence based on patristic distances

On the basis of patristic Distances, the **closest** sequence is: Microbacterium\_lacticum T X77441 AND is in the proximal cluster

No statistics available for patristic distances between members of the species of the closest sequence

Remark: the patristic distance to Microbacterium\_lacticum T X77441 is in the 75th percentile of the Microbacterium genus inter-species patristic distances : the sequence may correspond to a member of this genus

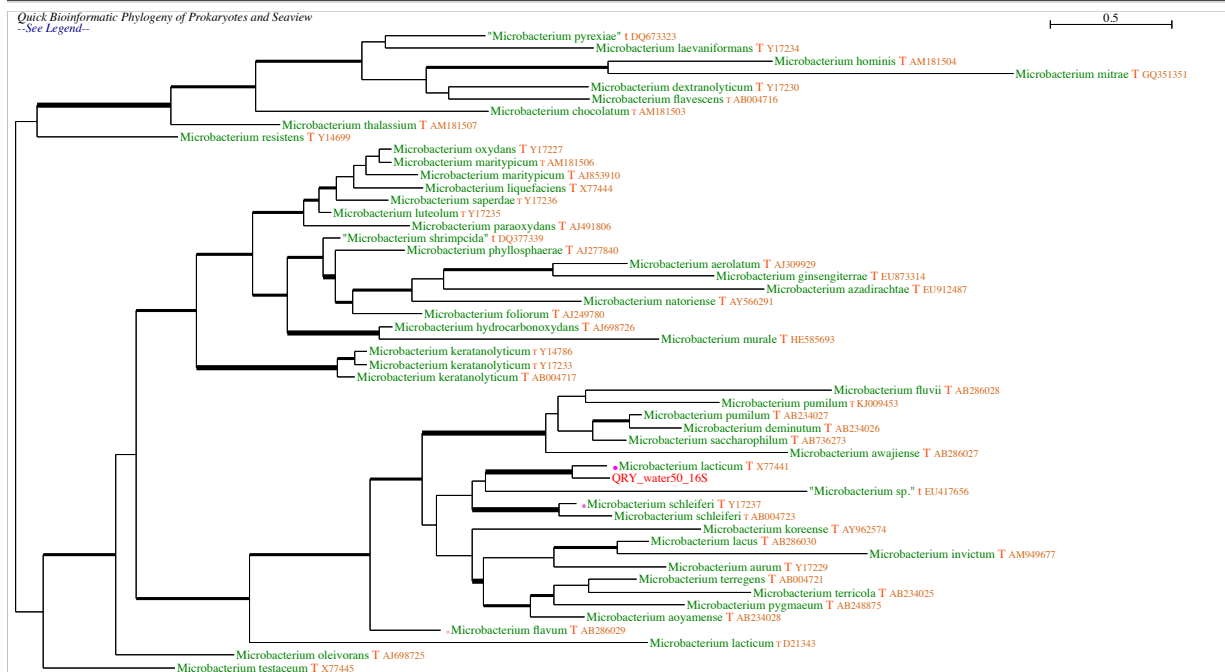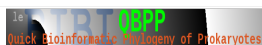

[in short](#)

[How-to](#)

[Cite](#)

[Tests sets](#)

[Databases](#)

[Contact us](#)

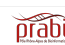

**lebibi Quick BioInformatic Phylogeny of Prokaryotes**

**Summary of the methods and database used during this session**

Analysis Extraction of similar sequences for ingroup sequences: Query

There are 44 sequences in your batch

BLAST using the procaryota\_SSU-rDNA-16S\_TS-stringent database. Trying to extract 50 sequences with expect lower than 0.1

ALIGNMENT using mafft Options : speed oriented

BMGE use for alignment optimization Options :defaults parameters

TREE : phylogenetic tree using fasttree

Evolution model GTR -gamma

**RESULTS**

**Results****Query data**Database: **procaryota\_SSU-rDNA-16S\_TS-stringent**

Note: The use of the stringent database (all the GenBank sequences for a given species) may lead to errors due to the low quality identification of some sequences, a careful analysis is necessary.

Original name of the query (from fasta) : **QRY\_water51\_16S**. leBiBI ref : ppqIvwPtL**Sequence composition**Length of Query sequence is : **1281**Nucleotide Composition 338 A - 284 T - 269 C - 390 G - **0 N 0.0 % Gaps % =0.0**

GC%=0.51

**Quality of the BLAST analysis**The number of Blast hits is **OK**All is OK, the best BLAST hit length (**1279**) is =99.8% of the query length**Biodiversity level**All extracted sequences appear to belong to Bacteria and their lowest shared taxon is: Bacteria-Proteobacteria-Gammaproteobacteria-Pseudomonadales-Moraxellaceae  
More than one genus in the extracted sequences. An outgroup will be present in the tree.**Phylogenetic tree analysis**Proximal Cluster ['*Moraxella\_pluranimalium* T AM884564', '*Moraxella\_lincolnii* T FR822735', '*Moraxella\_lincolnii* T HF558363'] (and 2 others)**ANALYSIS OF PATRISTIC DISTANCES**Absence of the closest sequence based on patristic distances *Moraxella\_osloensis* T JN175341 from the proximal cluster.

Look at the tree and branch support

On the basis of patristic Distances, the closest TS sequence is: *Moraxella\_osloensis* T JN175341 AND is NOT in the proximal cluster

The closest sequence has not the same species name as the closest TS

No statistics available for patristic distances between members of the species of the closest sequence

Remark: the patristic distance to *Moraxella\_osloensis* T JN175341 is in the 75th percentile of the *Moraxella* genus inter-species patristic distances : the sequence may correspond to a member of this genus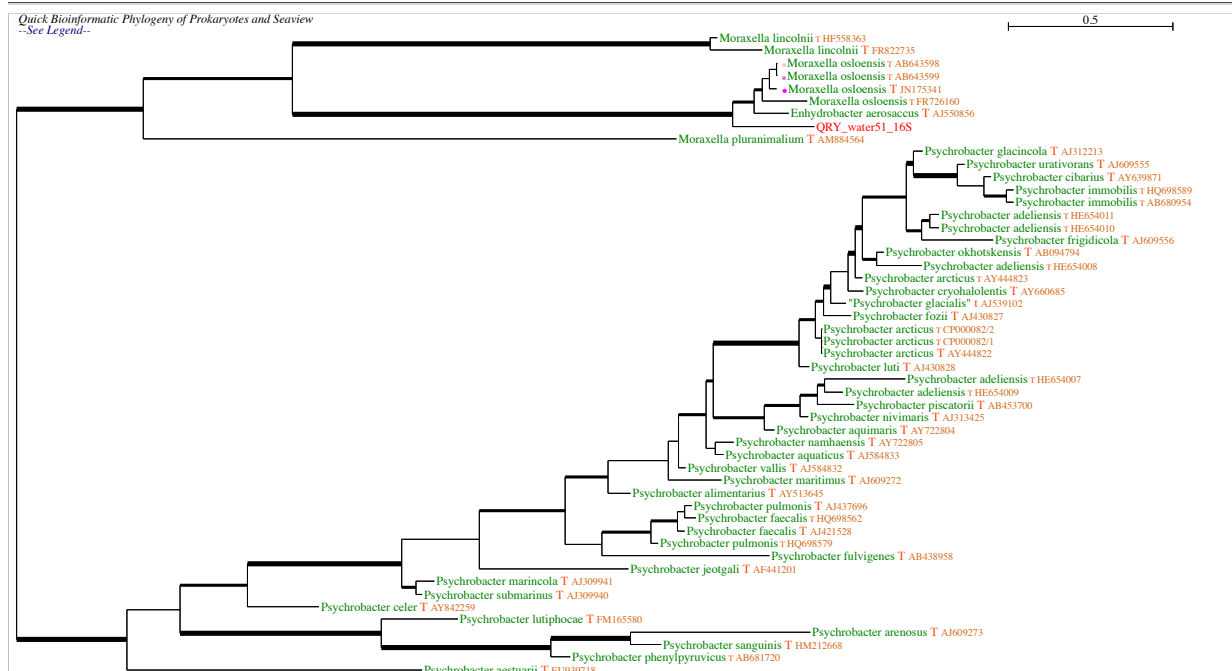[in short](#)[How-to](#)[Cite](#)[Tests sets](#)[Databases](#)[Contact us](#)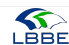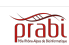

## lebib Quick BioInformatic Phylogeny of Prokaryotes

### Summary of the methods and database used during this session

Analysis Extraction of similar sequences for ingroup sequences: Query

There are 44 sequences in your batch

BLAST using the procaryota\_SSU-rDNA-16S\_TS-stringent database. Trying to extract 50 sequences with expect lower than 0.1

ALIGNMENT using mafft Options : speed oriented

BMGE use for alignment optimization Options : defaults parameters

TREE : phylogenetic tree using fasttree

Evolution model GTR -gamma

## RESULTS

**Results**

**Query data**

Database: **procaryota\_SSU-rDNA-16S\_TS-stringent**

Note: The use of the stringent database (all the GenBank sequences for a given species) may lead to errors due to the low quality identification of some sequences, a careful analysis is necessary.

Original name of the query (from fasta): **QRY\_water52\_16S**. leBiBI ref : ppqIvwPtL

**Sequence composition**

Length of Query sequence is : **1278**

Nucleotide Composition 307 A - 250 T - 304 C - 417 G - **0 N 0.0 % Gaps % =0.0**  
GC%=0.56

**Quality of the BLAST analysis**

The number of Blast hits is **OK**

All is OK, the best BLAST hit length (**1280**) is =100.% of the query length

**Biodiversity level**

All extracted sequences appear to belong to Bacteria and their lowest shared taxon is: Bacteria-Actinobacteria-Actinobacteridae-Actinomycetales-Micrococccineae-Microbacteriaceae-Microbacterium

**CAUTION!** One genus only in the extracted sequences. No outgroup *may* be pertinent enough for a good phylogeny. You may need to increase the number of desired sequences or use a *more stringent database*.

**Phylogenetic tree analysis**

Proximal Cluster [**'Microbacterium\_oxydans T Y17227', 'Microbacterium\_maritipicum T AJ853910', 'Microbacterium\_maritipicum T AM181506'**]

**ANALYSIS OF PATRISTIC DISTANCES**

Microbacterium\_maritipicum T AM181506 is the closest sequence based on patristic distances

On the basis of patristic Distances, the **closest** sequence is: Microbacterium\_maritipicum T AM181506 AND is in the proximal cluster

No statistics available for patristic distances between members of the species of the closest sequence

Remark: the patristic distance to Microbacterium\_maritipicum T AM181506 is in the 75th percentile of the Microbacterium genus inter-species patristic distances : the sequence may correspond to a member of this genus

Quick Bioinformatic Phylogeny of Prokaryotes and Seaview  
--See Legend--

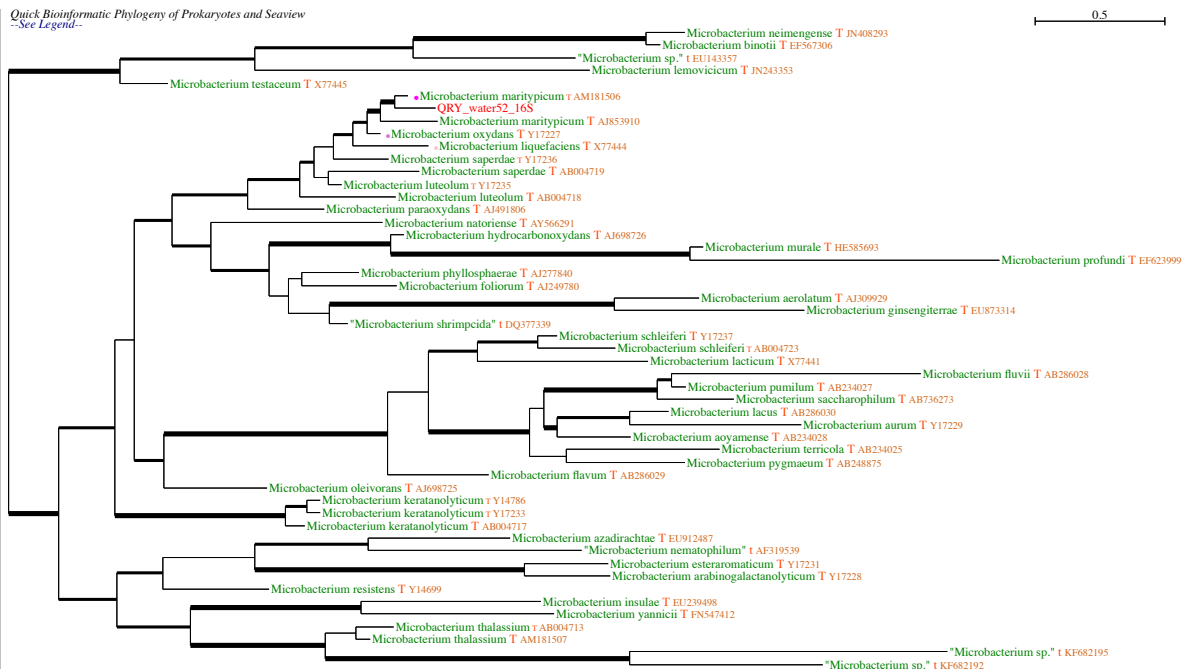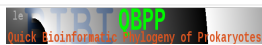

[in short](#)

[How-to](#)

[Cite](#)

[Tests sets](#)

[Databases](#)

[Contact us](#)

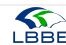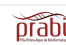

## lebibi Quick BioInformatic Phylogeny of Prokaryotes

### Summary of the methods and database used during this session

Analysis Extraction of similar sequences for ingroup sequences: Query

There are 44 sequences in your batch

BLAST using the procaryota\_SSU-rDNA-16S\_TS-stringent database. Trying to extract 50 sequences with expect lower than 0.1

ALIGNMENT using mafft Options : speed oriented

BMGE use for alignment optimization Options :defaults parameters

TREE : phylogenetic tree using fasttree

Evolution model GTR -gamma

## RESULTS



**Results**

**Query data**

Database: **procaryota\_SSU-rDNA-16S\_TS-stringent**

Note: The use of the stringent database (all the GenBank sequences for a given species) may lead to errors due to the low quality identification of some sequences, a careful analysis is necessary.

Original name of the query (from fasta) : **QRY\_water54\_16S**. leBiBI ref : ppqIvwPtL

**Sequence composition**

Length of Query sequence is : **1256**

Nucleotide Composition 314 A - 243 T - 307 C - 380 G - **0 N 0.0 % Gaps % =12.0**  
GC%=0.55

**Quality of the BLAST analysis**

The number of Blast hits is **OK**

The fragment given by BLAST (1097) is shorter than expected: 0.87% of the query length

**POSSIBLY DIFFICULT INTERPRETATION**

Are you sure of the quality of the query sequence ? Look at the alignment below and to blast suggestions

**Biodiversity level**

All extracted sequences appear to belong to Bacteria and their lowest shared taxon is: Bacteria-Proteobacteria-Gammaproteobacteria-Xanthomonadales-Xanthomonadaceae  
More than one genus in the extracted sequences. An outgroup will be present in the tree.

**Phylogenetic tree analysis**

Proximal Cluster [**Pseudoxanthomonas\_kaohsiungensis T AY650027**]

**ANALYSIS OF PATRISTIC DISTANCES**

**Pseudoxanthomonas\_kaohsiungensis T AY650027** is the closest sequence based on patristic distances

On the basis of patristic Distances, the **closest** sequence is: **Pseudoxanthomonas\_kaohsiungensis T AY650027** AND is in the proximal cluster

No statistics available for patristic distances between members of the species of the closest sequence

Remark: the patristic distance to **Pseudoxanthomonas\_kaohsiungensis T AY650027** is **OUTSIDE** the 75th percentile of the **Pseudoxanthomonas** inter-species patristic distances : the sequence may not correspond to this genus or is of very low quality

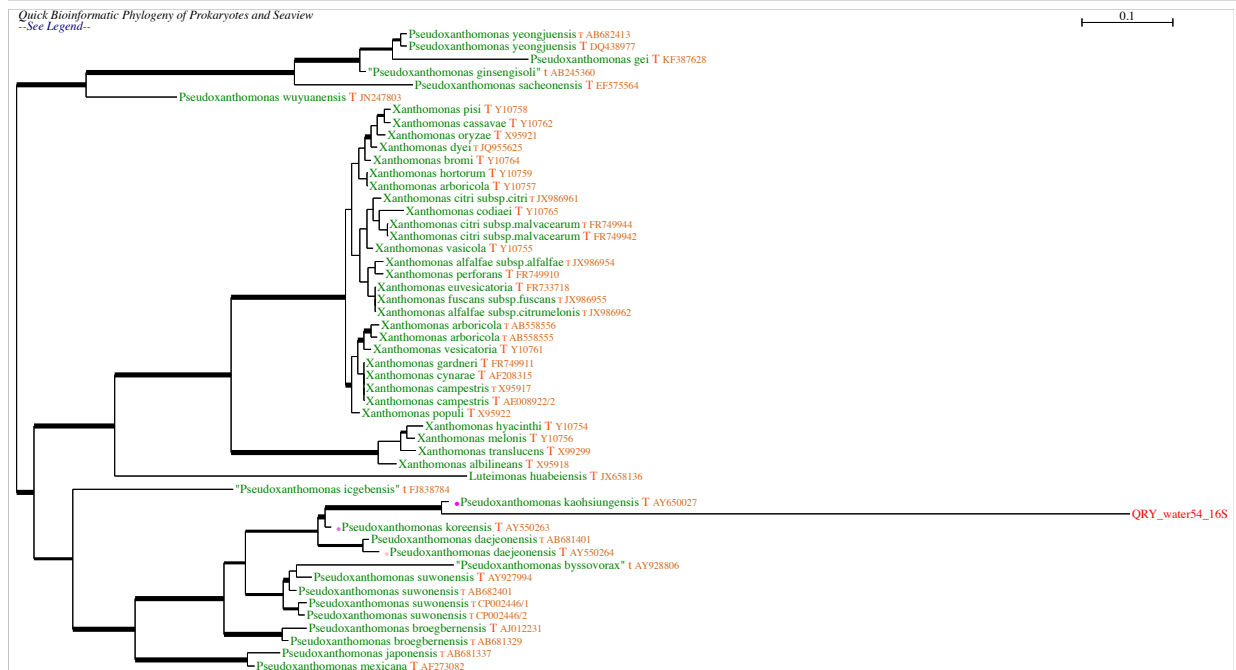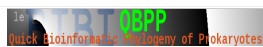

[in short](#)

[How-to](#)

[Cite](#)

[Tests sets](#)

[Databases](#)

[Contact us](#)

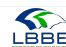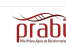

**lebibi Quick BioInformatic Phylogeny of Prokaryotes**

**Summary of the methods and database used during this session**

Analysis Extraction of similar sequences for ingroup sequences: Query

There are 44 sequences in your batch

BLAST using the procaryota\_SSU-rDNA-16S\_TS-stringent database. Trying to extract 50 sequences with expect lower than 0.1

ALIGNMENT using mafft Options : speed oriented

BMGE use for alignment optimization Options :defaults parameters

TREE : phylogenetic tree using fasttree

Evolution model GTR -gamma

**RESULTS**

**Results****Query data**Database: **procaryota\_SSU-rDNA-16S\_TS-stringent**

Note: The use of the stringent database (all the GenBank sequences for a given species) may lead to errors due to the low quality identification of some sequences, a careful analysis is necessary.

Original name of the query (from fasta): **QRY\_water55\_16S**, leBiBI ref : ppqIvwPtL**Sequence composition**Length of Query sequence is : **1212**Nucleotide Composition 292 A - 253 T - 282 C - 385 G - **0 N 0.0 % Gaps % =0.0**

GC%=0.55

**Quality of the BLAST analysis**The number of Blast hits is **OK**All is OK, the best BLAST hit length (**1213**) is =100.% of the query length**Biodiversity level**

All extracted sequences appear to belong to Bacteria and their lowest shared taxon is: Bacteria-Proteobacteria-Alphaproteobacteria

More than one genus in the extracted sequences. An outgroup will be present in the tree.

**Phylogenetic tree analysis**Proximal Cluster ['*Sphingomonas\_adhaesiva* T AB680766', '*Sphingomonas\_adhaesiva* T D16146', '*Sphingomonas\_ginsenosidimitans* T HM204925']**ANALYSIS OF PATRISTIC DISTANCES***Sphingomonas\_ginsenosidimitans* T HM204925 is the closest sequence based on patristic distancesOn the basis of patristic Distances, the closest sequence is: *Sphingomonas\_ginsenosidimitans* T HM204925 AND is in the proximal cluster

No statistics available for patristic distances between members of the species of the closest sequence

Remark: the patristic distance to *Sphingomonas\_ginsenosidimitans* T HM204925 is in the 75th percentile of the *Sphingomonas* genus inter-species patristic distances : the sequence may correspond to a member of this genus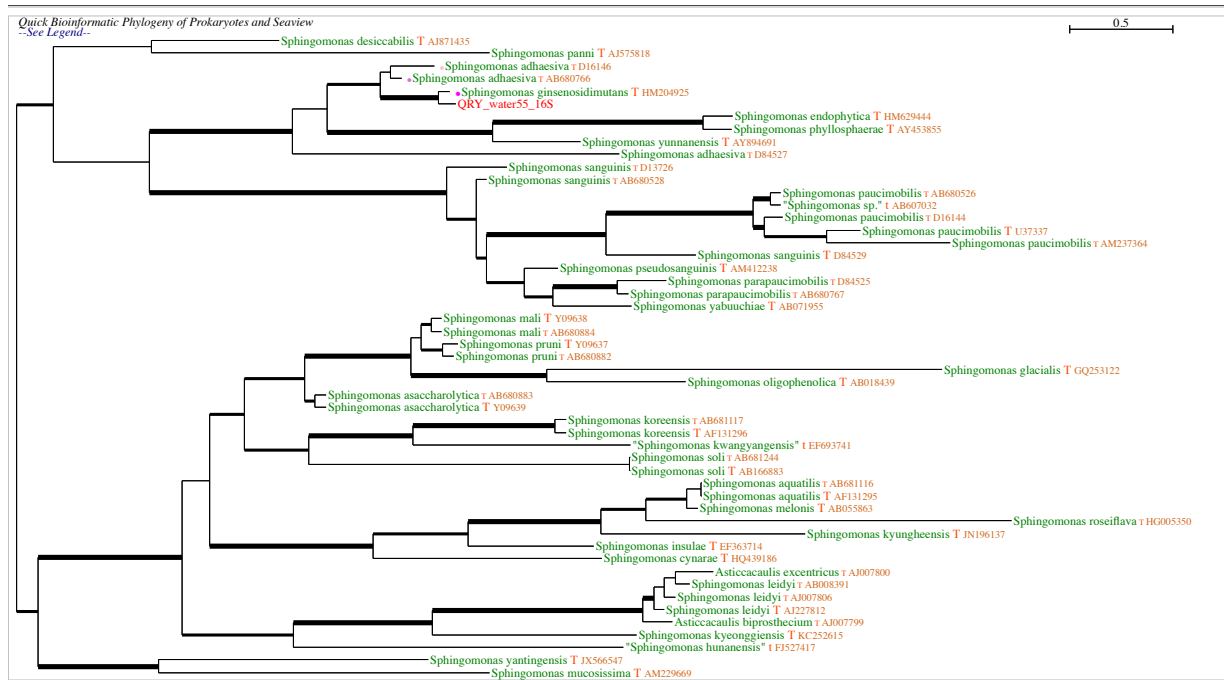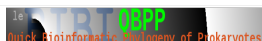[in short](#)[How-to](#)[Cite](#)[Tests sets](#)[Databases](#)[Contact us](#)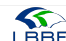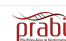

## lebib Quick BioInformatic Phylogeny of Prokaryotes

### Summary of the methods and database used during this session

Analysis Extraction of similar sequences for ingroup sequences: Query

There are 44 sequences in your batch

BLAST using the procaryota\_SSU-rDNA-16S\_TS-stringent database. Trying to extract 50 sequences with expect lower than 0.1

ALIGNMENT using mafft Options : speed oriented

BMGE use for alignment optimization Options :defaults parameters

TREE : phylogenetic tree using fasttree

Evolution model GTR -gamma

## RESULTS

**Results**

**Query data**

Database: **procaryota\_SSU-rDNA-16S\_TS-stringent**

Note: The use of the stringent database (all the GenBank sequences for a given species) may lead to errors due to the low quality identification of some sequences, a careful analysis is necessary.

Original name of the query (from fasta) : **QRY\_water34\_16S**. leBiBI ref : ppqIvwPtL

**Sequence composition**

Length of Query sequence is : **1274**

Nucleotide Composition 318 A - 247 T - 302 C - 407 G - **0 N 0.0 % Gaps % =0.0**  
GC%=0.55

**Quality of the BLAST analysis**

The number of Blast hits is **OK**

All is OK, the best BLAST hit length (**1274**) is =100.% of the query length

**Biodiversity level**

All extracted sequences appear to belong to Bacteria and their lowest shared taxon is: Bacteria-Actinobacteria-Actinobacteridae-Actinomycetales-Micrococineae-Microbacteriaceae  
More than one genus in the extracted sequences. An outgroup will be present in the tree.

**Phylogenetic tree analysis**

Proximal Cluster [**'Microbacterium\_hatanonis T AB274908', 'Microbacterium\_aurum T Y17229'**]

**ANALYSIS OF PATRISTIC DISTANCES**

Microbacterium\_aurum T Y17229 is the closest sequence based on patristic distances

On the basis of patristic Distances, the closest sequence is: Microbacterium\_aurum T Y17229 AND is in the proximal cluster

No statistics available for patristic distances between members of the species of the closest sequence

Remark: the patristic distance to Microbacterium\_aurum T Y17229 is in the 75th percentile of the Microbacterium genus inter-species patristic distances : the sequence may correspond to a member of this genus

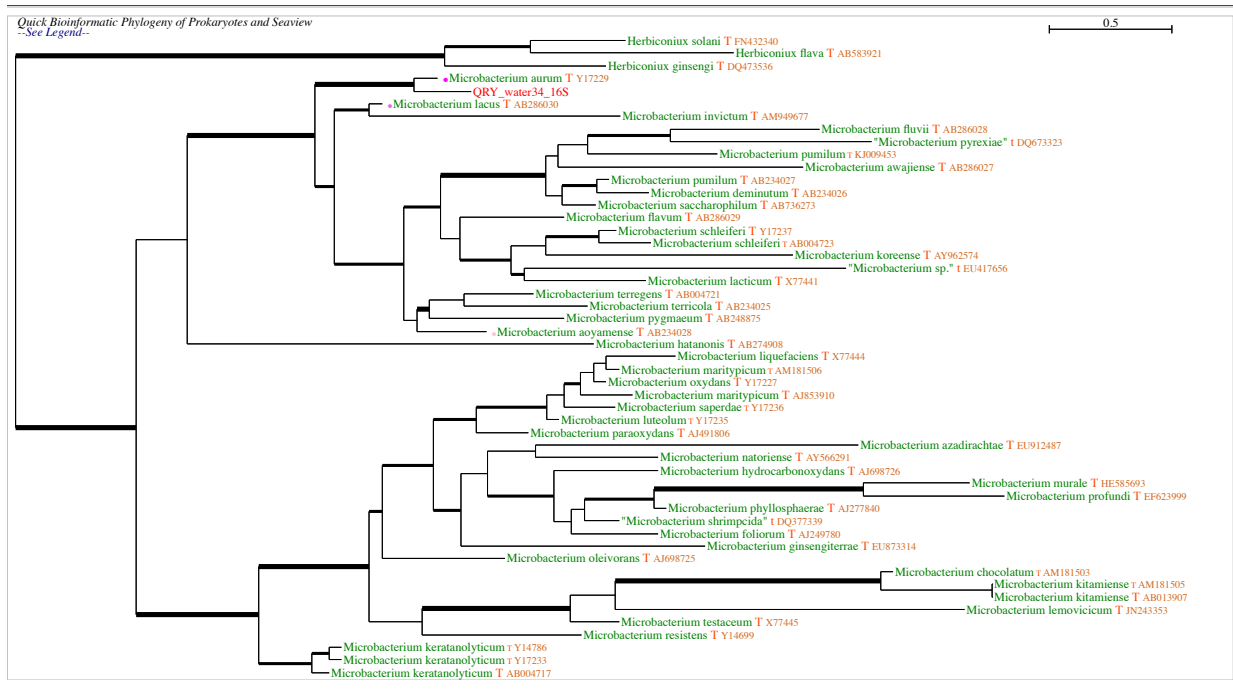

[in short](#)

[How-to](#)

[Cite](#)

[Tests sets](#)

[Databases](#)

[Contact us](#)

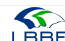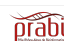

**lebibi Quick BioInformatic Phylogeny of Prokaryotes**

**Summary of the methods and database used during this session**

Analysis Extraction of similar sequences for ingroup sequences: Query

There are 44 sequences in your batch

BLAST using the procaryota\_SSU-rDNA-16S\_TS-stringent database. Trying to extract 50 sequences with expect lower than 0.1

ALIGNMENT using mafft Options : speed oriented

BMGE use for alignment optimization Options :defaults parameters

TREE : phylogenetic tree using fasttree

Evolution model GTR -gamma

**RESULTS**

**Results**

**Query data**

Database: **procaryota\_SSU-rDNA-16S\_TS-stringent**

Note: The use of the stringent database (all the GenBank sequences for a given species) may lead to errors due to the low quality identification of some sequences, a careful analysis is necessary.

Original name of the query (from fasta) : **QRY\_water57\_16S**. leBiBI ref : ppqIvwPtL

**Sequence composition**

Length of Query sequence is : **1276**

Nucleotide Composition 298 A - 254 T - 300 C - 424 G - **0 N 0.0 % Gaps % =0.0**  
GC%=0.56

**Quality of the BLAST analysis**

The number of Blast hits is **OK**

All is OK, the best BLAST hit length (**1271**) is =99.6% of the query length

**Biodiversity level**

All extracted sequences appear to belong to Bacteria and their lowest shared taxon is: Bacteria-Actinobacteria-Actinobacteridae-Actinomycetales-Micrococineae-Microbacteriaceae-Microbacterium

**CAUTION!** One genus only in the extracted sequences. No outgroup *may* be pertinent enough for a good phylogeny. You may need to increase the number of desired sequences or use a *more stringent database*.

**Phylogenetic tree analysis**

**Incertae sedis** ['NO\_ACCEPTABLE\_CLUSTER']

No clear proximal cluster; use the tree for determination, if possible

No acceptable solution

**ANALYSIS OF PATRISTIC DISTANCES**

Closest sequence based on patristic distances *Microbacterium trichothecenolyticum* T AB004722

Remark: the patristic distance to *Microbacterium trichothecenolyticum* T AB004722 is in the 75th percentile of the *Microbacterium* genus inter-species patristic distances : the sequence may correspond to a member of this genus

The closest sequence based on patristic distances *Microbacterium trichothecenolyticum* T AB004722 is NOT the FIRST BLAST hit  
The closest sequence based on patristic distances *Microbacterium trichothecenolyticum* T AB004722 is NOT in the top 5 BLAST hits

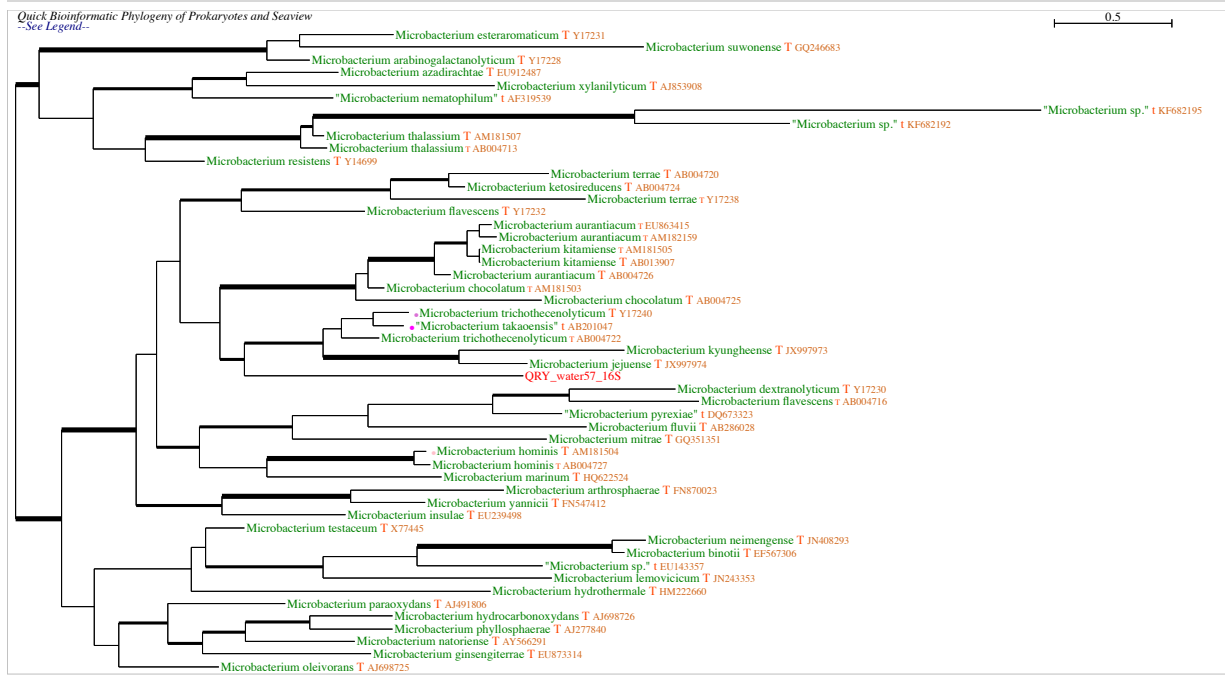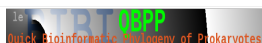

[in short](#)

[How-to](#)

[Cite](#)

[Tests sets](#)

[Databases](#)

[Contact us](#)

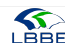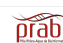

**lebibi Quick BioInformatic Phylogeny of Prokaryotes**

**Summary of the methods and database used during this session**

Analysis Extraction of similar sequences for ingroup sequences: Query

There are 44 sequences in your batch

BLAST using the procaryota\_SSU-rDNA-16S\_TS-stringent database. Trying to extract 50 sequences with expect lower than 0.1

ALIGNMENT using mafft Options : speed oriented

BMGE use for alignment optimization Options :defaults parameters

TREE : phylogenetic tree using fasttree

Evolution model GTR -gamma

**RESULTS**

**Results****Query data**Database: **procaryota\_SSU-rDNA-16S\_TS-stringent**

Note: The use of the stringent database (all the GenBank sequences for a given species) may lead to errors due to the low quality identification of some sequences, a careful analysis is necessary.

Original name of the query (from fasta): **QRY\_water58\_16S**, leBiBI ref : ppqIvwPtL**Sequence composition**Length of Query sequence is : **1269**Nucleotide Composition 312 A - 243 T - 303 C - 411 G - **0 N 0.0 % Gaps % =0.0**

GC%=0.56

**Quality of the BLAST analysis**The number of Blast hits is **OK**All is OK, the best BLAST hit length (**1269**) is =100.% of the query length**Biodiversity level**

All extracted sequences appear to belong to Bacteria and their lowest shared taxon is: Bacteria-Actinobacteria-Actinobacteridae-Actinomycetales-Micrococineae-Microbacteriaceae-Microbacterium

**CAUTION!** One genus only in the extracted sequences. No outgroup *may* be pertinent enough for a good phylogeny. You may need to increase the number of desired sequences or use a *more stringent database*.**Phylogenetic tree analysis**Proximal Cluster ['*Microbacterium flavum* T AB286029', '*Microbacterium lacticum* T X77441']**ANALYSIS OF PATRISTIC DISTANCES***Microbacterium lacticum* T X77441 is the closest sequence based on patristic distancesOn the basis of patristic Distances, the **closest** sequence is: *Microbacterium lacticum* T X77441 AND is in the proximal cluster

No statistics available for patristic distances between members of the species of the closest sequence

Remark: the patristic distance to *Microbacterium lacticum* T X77441 is in the 75th percentile of the *Microbacterium* genus inter-species patristic distances : the sequence may correspond to a member of this genus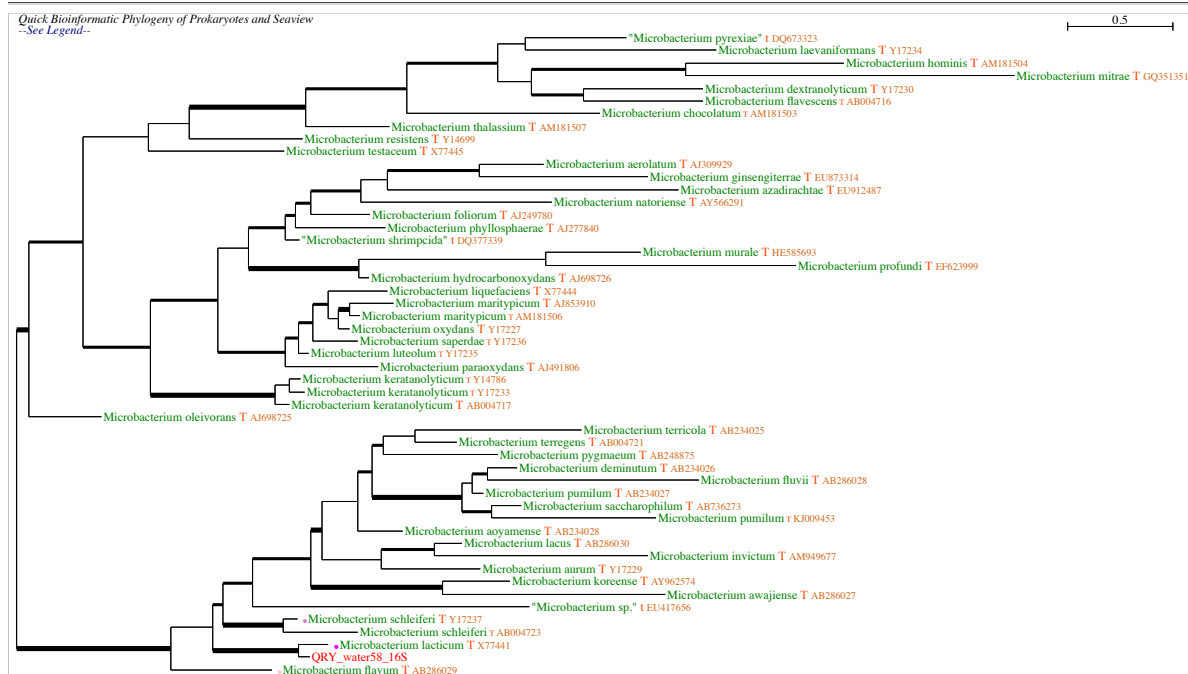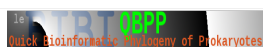[in short](#)[How-to](#)[Cite](#)[Tests sets](#)[Databases](#)[Contact us](#)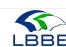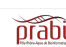**lebib Quick BioInformatic Phylogeny of Prokaryotes****Summary of the methods and database used during this session**

Analysis Extraction of similar sequences for ingroup sequences: Query

There are 44 sequences in your batch

BLAST using the procaryota\_SSU-rDNA-16S\_TS-stringent database. Trying to extract 50 sequences with expect lower than 0.1

ALIGNMENT using mafft Options : speed oriented

BMGE use for alignment optimization Options : defaults parameters

TREE : phylogenetic tree using fasttree

Evolution model GTR -gamma

**RESULTS**

**Results**

**Query data**

Database: **procaryota\_SSU-rDNA-16S\_TS-stringent**

Note: The use of the stringent database (all the GenBank sequences for a given species) may lead to errors due to the low quality identification of some sequences, a careful analysis is necessary.

Original name of the query (from fasta): **QRY\_water60\_16S**, leBiBI ref : ppqIvwPtL

**Sequence composition**

Length of Query sequence is : **1283**

Nucleotide Composition 316 A - 248 T - 306 C - 413 G - **0 N 0.0 % Gaps % =0.0**  
GC%=0.56

**Quality of the BLAST analysis**

The number of Blast hits is **OK**

All is OK, the best BLAST hit length (**1281**) is =99.8% of the query length

**Biodiversity level**

All extracted sequences appear to belong to Bacteria and their lowest shared taxon is: Bacteria-Actinobacteria-Actinobacteridae-Actinomycetales-Micrococineae-Microbacteriaceae-Microbacterium

**CAUTION!** One genus only in the extracted sequences. No outgroup *may* be pertinent enough for a good phylogeny. You may need to increase the number of desired sequences or use a *more stringent database*.

**Phylogenetic tree analysis**

Proximal Cluster ['**Microbacterium\_lacticum T X77441**']

**ANALYSIS OF PATRISTIC DISTANCES**

Microbacterium\_lacticum T X77441 is the closest sequence based on patristic distances

On the basis of patristic Distances, the **closest** sequence is: Microbacterium\_lacticum T X77441 AND is in the proximal cluster

No statistics available for patristic distances between members of the species of the closest sequence

Remark: the patristic distance to Microbacterium\_lacticum T X77441 is in the 75th percentile of the Microbacterium genus inter-species patristic distances : the sequence may correspond to a member of this genus

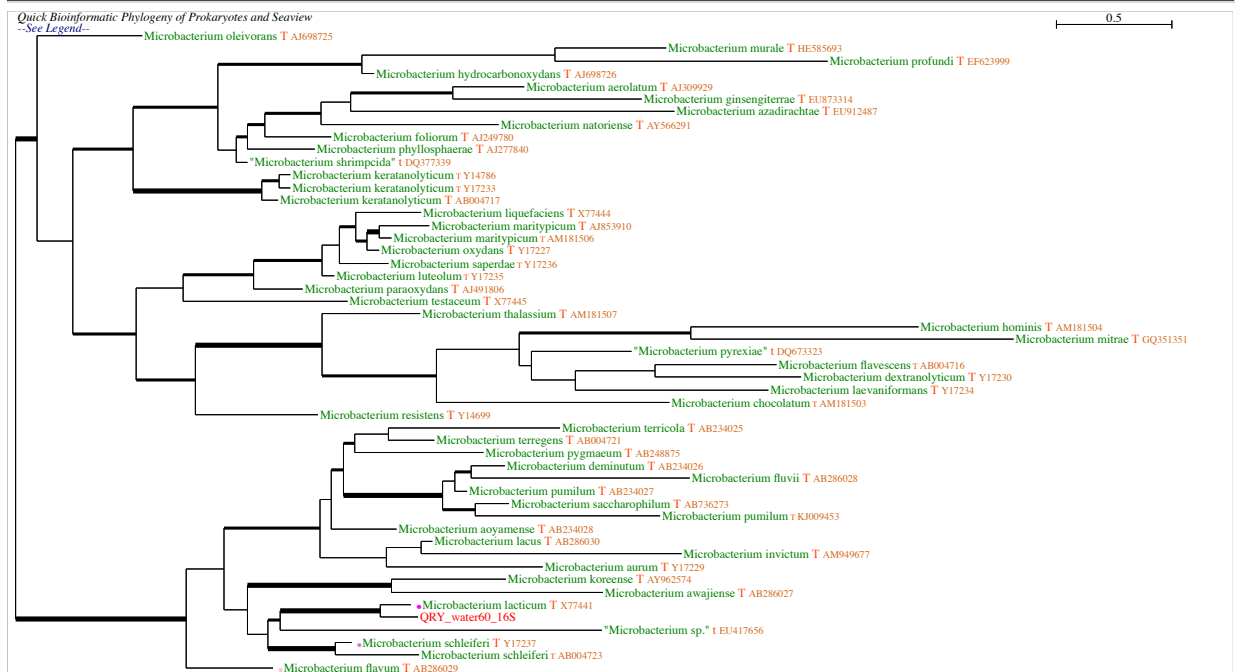

[in short](#)

[How-to](#)

[Cite](#)

[Tests sets](#)

[Databases](#)

[Contact us](#)



**lebibi Quick BioInformatic Phylogeny of Prokaryotes**

**Summary of the methods and database used during this session**

Analysis Extraction of similar sequences for ingroup sequences: Query

There are 44 sequences in your batch

BLAST using the procaryota\_SSU-rDNA-16S\_TS-stringent database. Trying to extract 50 sequences with expect lower than 0.1

ALIGNMENT using mafft Options : speed oriented

BMGE use for alignment optimization Options :defaults parameters

TREE : phylogenetic tree using fasttree

Evolution model GTR -gamma

**RESULTS**

**Results**

**Query data**

Database: **procaryota\_SSU-rDNA-16S\_TS-stringent**

Note: The use of the stringent database (all the GenBank sequences for a given species) may lead to errors due to the low quality identification of some sequences, a careful analysis is necessary.

Original name of the query (from fasta) : **QRY\_water61\_16S**. leBiBI ref : ppqIvwPtL

**Sequence composition**

Length of Query sequence is : **1275**

Nucleotide Composition 307 A - 249 T - 304 C - 415 G - **0 N 0.0 % Gaps % =0.0**

GC%=0.56

**Quality of the BLAST analysis**

The number of Blast hits is **OK**

All is OK, the best BLAST hit length (**1273**) is =99.8% of the query length

**Biodiversity level**

All extracted sequences appear to belong to Bacteria and their lowest shared taxon is: Bacteria-Actinobacteria-Actinobacteridae-Actinomycetales-Micrococccineae-Microbacteriaceae-Microbacterium

**CAUTION !** One genus only in the extracted sequences. No outgroup *may* be pertinent enough for a good phylogeny. You may need to increase the number of desired sequences or use a *more stringent database*.

**Phylogenetic tree analysis**

Proximal Cluster [**'Microbacterium\_maritipicum T AM181506'**]

**ANALYSIS OF PATRISTIC DISTANCES**

Microbacterium\_maritipicum T AM181506 is the closest sequence based on patristic distances

On the basis of patristic Distances, the **closest** sequence is: Microbacterium\_maritipicum T AM181506 AND is in the proximal cluster

No statistics available for patristic distances between members of the species of the closest sequence

Remark: the patristic distance to Microbacterium\_maritipicum T AM181506 is in the 75th percentile of the Microbacterium genus inter-species patristic distances : the sequence may correspond to a member of this genus

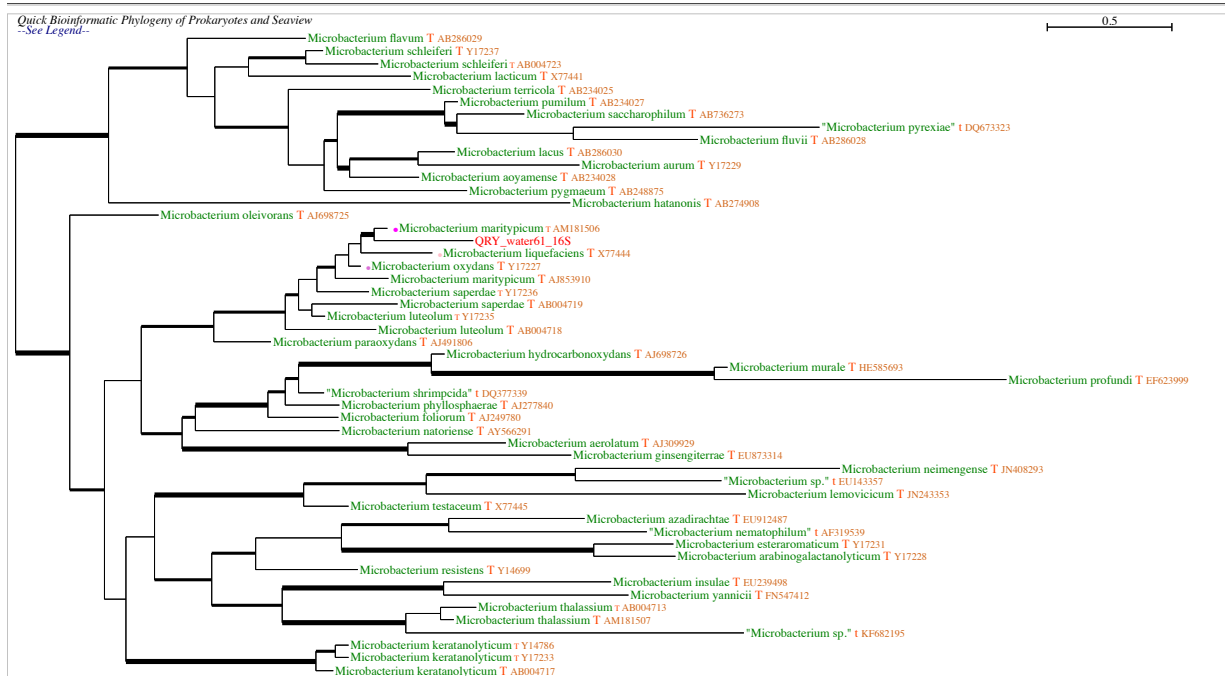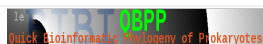

[in short](#)

[How-to](#)

[Cite](#)

[Tests sets](#)

[Databases](#)

[Contact us](#)

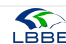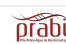

**lebibi Quick BioInformatic Phylogeny of Prokaryotes**

**Summary of the methods and database used during this session**

Analysis Extraction of similar sequences for ingroup sequences: Query

There are 44 sequences in your batch

BLAST using the procaryota\_SSU-rDNA-16S\_TS-stringent database. Trying to extract 50 sequences with expect lower than 0.1

ALIGNMENT using mafft Options : speed oriented

BMGE use for alignment optimization Options :defaults parameters

TREE : phylogenetic tree using fasttree

Evolution model GTR -gamma

**RESULTS**

**Results**

**Query data**

Database: **procaryota\_SSU-rDNA-16S\_TS-stringent**

Note: The use of the stringent database (all the GenBank sequences for a given species) may lead to errors due to the low quality identification of some sequences, a careful analysis is necessary.

Original name of the query (from fasta) : **QRY\_water62\_16S**. leBiBI ref : ppqIvwPtL

**Sequence composition**

Length of Query sequence is : **1279**

Nucleotide Composition 315 A - 243 T - 306 C - 415 G - **0 N 0.0 % Gaps % =0.0**

GC%=0.56

**Quality of the BLAST analysis**

The number of Blast hits is **OK**

All is OK, the best BLAST hit length (**1277**) is =99.8% of the query length

**Biodiversity level**

All extracted sequences appear to belong to Bacteria and their lowest shared taxon is: Bacteria-Actinobacteria-Actinobacteridae-Actinomycetales-Micrococccineae-Microbacteriaceae-Microbacterium

**CAUTION!** One genus only in the extracted sequences. No outgroup *may* be pertinent enough for a good phylogeny. You may need to increase the number of desired sequences or use a *more stringent database*.

**Phylogenetic tree analysis**

Proximal Cluster [**'Microbacterium\_lacticum T X77441'**]

**ANALYSIS OF PATRISTIC DISTANCES**

Microbacterium\_lacticum T X77441 is the closest sequence based on patristic distances

On the basis of patristic Distances, the **closest** sequence is: Microbacterium\_lacticum T X77441 AND is in the proximal cluster

No statistics available for patristic distances between members of the species of the closest sequence

Remark: the patristic distance to Microbacterium\_lacticum T X77441 is in the 75th percentile of the Microbacterium genus inter-species patristic distances : the sequence may correspond to a member of this genus

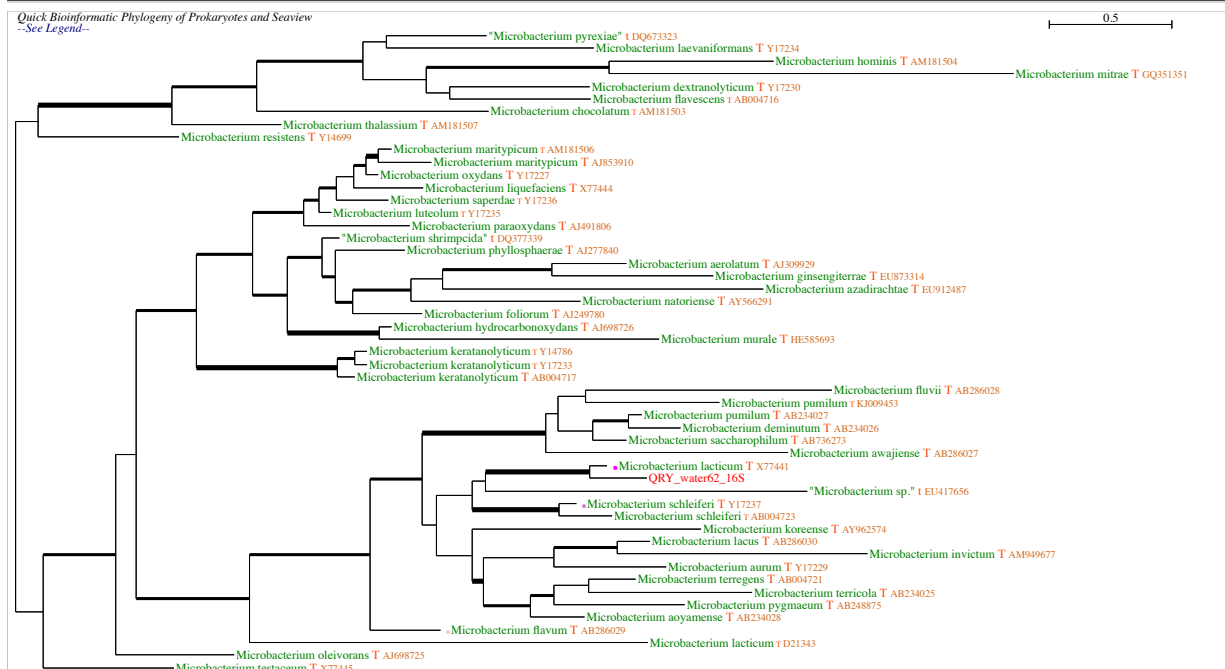

[in short](#)

[How-to](#)

[Cite](#)

[Tests sets](#)

[Databases](#)

[Contact us](#)



**lebibi Quick BioInformatic Phylogeny of Prokaryotes**

**Summary of the methods and database used during this session**

Analysis Extraction of similar sequences for ingroup sequences: Query

There are 44 sequences in your batch

BLAST using the procaryota\_SSU-rDNA-16S\_TS-stringent database. Trying to extract 50 sequences with expect lower than 0.1

ALIGNMENT using mafft Options : speed oriented

BMGE use for alignment optimization Options : defaults parameters

TREE : phylogenetic tree using fasttree

Evolution model GTR -gamma

**RESULTS**



**Results**

**Query data**

Database: **procaryota\_SSU-rDNA-16S\_TS-stringent**

Note: The use of the stringent database (all the GenBank sequences for a given species) may lead to errors due to the low quality identification of some sequences, a careful analysis is necessary.

Original name of the query (from fasta): **QRY\_water63\_16S**. leBiBI ref : ppqIvwPtL

**Sequence composition**

Length of Query sequence is : **1229**

Nucleotide Composition 297 A - 259 T - 282 C - 387 G - **0 N 0.0 % Gaps % =4.0**  
GC%=0.54

**Quality of the BLAST analysis**

The number of Blast hits is **OK**

All is OK, the best BLAST hit length (**1211**) is =98.5% of the query length

**Biodiversity level**

All extracted sequences appear to belong to Bacteria and their lowest shared taxon is: Bacteria-Proteobacteria-Alphaproteobacteria-Sphingomonadales-Sphingomonadaceae  
More than one genus in the extracted sequences. An outgroup will be present in the tree.

**Phylogenetic tree analysis**

Proximal Cluster ['Sphingomonas\_sp.? T AB607032', 'Sphingomonas\_paucimobilis T AM237364', 'Sphingomonas\_paucimobilis T U20776']

**ANALYSIS OF PATRISTIC DISTANCES**

Sphingomonas\_sp.? T AB607032 is the closest sequence based on patristic distances

On the basis of patristic Distances, the closest TS sequence is: Sphingomonas\_paucimobilis T AB680526 AND is NOT in the proximal cluster

The closest sequence has not the same species name as the closest TS

No statistics available for patristic distances between members of the species of the closest sequence

Remark: the patristic distance to Sphingomonas\_sp.? T AB607032 is in the 75th percentile of the Sphingomonas genus inter-species patristic distances : the sequence may correspond to a member of this genus

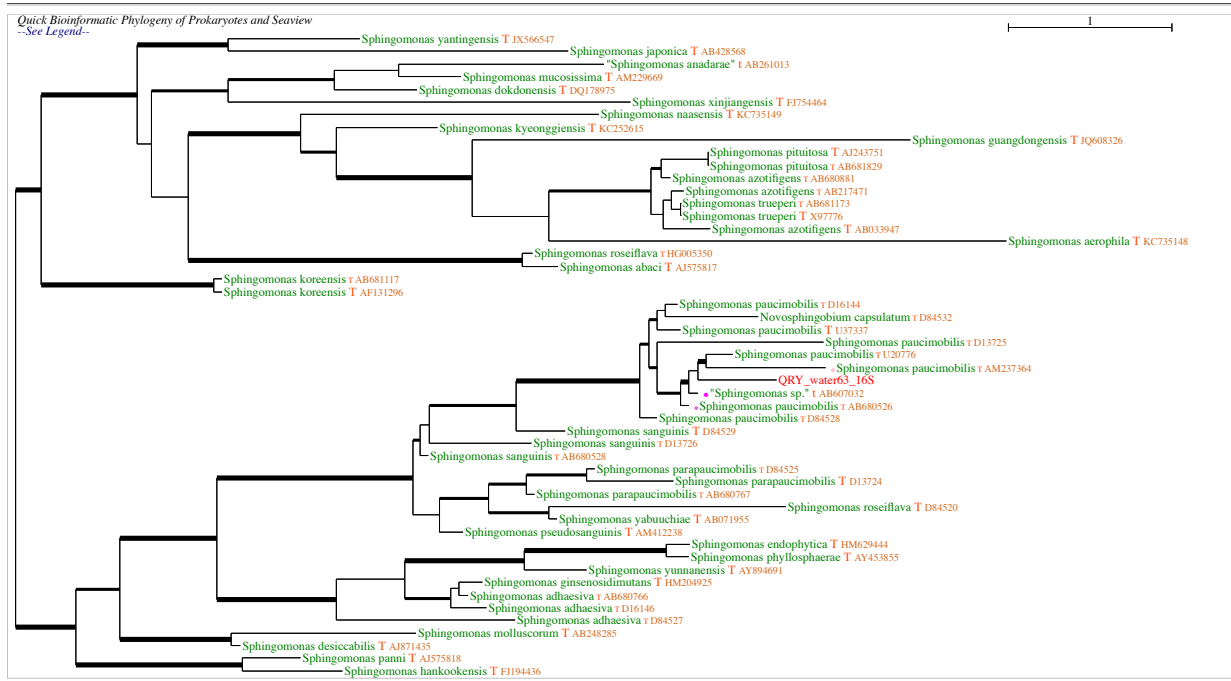

[in short](#)

[How-to](#)

[Cite](#)

[Tests sets](#)

[Databases](#)

[Contact us](#)

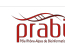

**lebibi Quick BioInformatic Phylogeny of Prokaryotes**

**Summary of the methods and database used during this session**

Analysis Extraction of similar sequences for ingroup sequences: Query

There are 44 sequences in your batch

BLAST using the procaryota\_SSU-rDNA-16S\_TS-stringent database. Trying to extract 50 sequences with expect lower than 0.1

ALIGNMENT using mafft Options : speed oriented

BMGE use for alignment optimization Options :defaults parameters

TREE : phylogenetic tree using fasttree

Evolution model GTR -gamma

**RESULTS**

**Results****Query data**Database: **procaryota\_SSU-rDNA-16S\_TS-stringent**

Note: The use of the stringent database (all the GenBank sequences for a given species) may lead to errors due to the low quality identification of some sequences, a careful analysis is necessary.

Original name of the query (from fasta): **QRY\_water64\_16S**, leBiBI ref : ppqIvwPtL**Sequence composition**Length of Query sequence is : **1282**Nucleotide Composition 335 A - 254 T - 297 C - 396 G - **0 N 0.0 % Gaps % =0.0**

GC%=0.54

**Quality of the BLAST analysis**The number of Blast hits is **OK**All is OK, the best BLAST hit length (**1280**) is =99.8% of the query length**Biodiversity level**

All extracted sequences appear to belong to Bacteria and their lowest shared taxon is: Bacteria-Proteobacteria-Betaproteobacteria-Burkholderiales

More than one genus in the extracted sequences. An outgroup will be present in the tree.

**Phylogenetic tree analysis**Proximal Cluster ['*Variovorax\_ginsengisoli* T AB245358', '*Variovorax\_paradoxus* T AB680784', '*Variovorax\_paradoxus* T AB622219'] (and 3 others)**ANALYSIS OF PATRISTIC DISTANCES***Variovorax\_boronicumulans* T AB681954 is the closest sequence based on patristic distancesOn the basis of patristic Distances, the **closest** sequence is: *Variovorax\_boronicumulans* T AB681954 AND is in the proximal cluster**No statistics available for patristic distances between members of the species of the closest sequence**Remark: the patristic distance to *Variovorax\_boronicumulans* T AB681954 is in the 75th percentile of the *Variovorax* genus inter-species patristic distances : the sequence may correspond to a member of this genus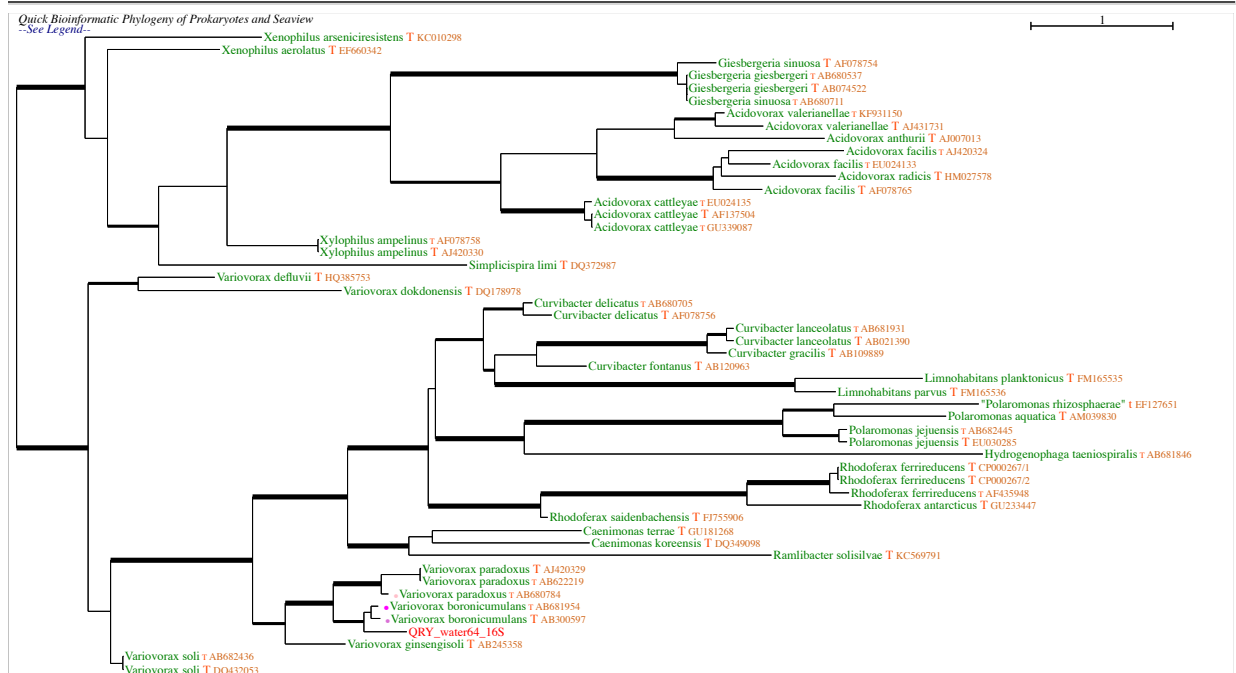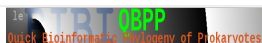[in short](#)[How-to](#)[Cite](#)[Tests sets](#)[Databases](#)[Contact us](#)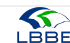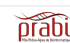**lebib Quick BioInformatic Phylogeny of Prokaryotes****Summary of the methods and database used during this session**

Analysis Extraction of similar sequences for ingroup sequences: Query

There are 44 sequences in your batch

BLAST using the procaryota\_SSU-rDNA-16S\_TS-stringent database. Trying to extract 50 sequences with expect lower than 0.1

ALIGNMENT using mafft Options : speed oriented

BMGE use for alignment optimization Options :defaults parameters

TREE : phylogenetic tree using fasttree

Evolution model GTR -gamma

**RESULTS**

**Results****Query data**Database: **procaryota\_SSU-rDNA-16S\_TS-stringent**

Note: The use of the stringent database (all the GenBank sequences for a given species) may lead to errors due to the low quality identification of some sequences, a careful analysis is necessary.

Original name of the query (from fasta): **QRY\_water66\_16S**. leBiBI ref : ppqIvwPtL**Sequence composition**Length of Query sequence is : **1282**Nucleotide Composition 335 A - 254 T - 296 C - 397 G - **0 N 0.0 % Gaps % =0.0**

GC%=0.54

**Quality of the BLAST analysis**The number of Blast hits is **OK**All is OK, the best BLAST hit length (**1282**) is =100.% of the query length**Biodiversity level**

All extracted sequences appear to belong to Bacteria and their lowest shared taxon is: Bacteria-Proteobacteria-Betaproteobacteria-Burkholderiales

More than one genus in the extracted sequences. An outgroup will be present in the tree.

**Phylogenetic tree analysis**Proximal Cluster [**'Variovorax\_boronicumulans T AB300597'**, **'Variovorax\_boronicumulans T AB681954'**]**ANALYSIS OF PATRISTIC DISTANCES**

Variovorax\_boronicumulans T AB681954 is the closest sequence based on patristic distances

On the basis of patristic Distances, the **closest** sequence is: Variovorax\_boronicumulans T AB681954 AND is in the proximal cluster**No statistics available for patristic distances between members of the species of the closest sequence**

Remark: the patristic distance to Variovorax\_boronicumulans T AB681954 is in the 75th percentile of the Variovorax genus inter-species patristic distances : the sequence may correspond to a member of this genus

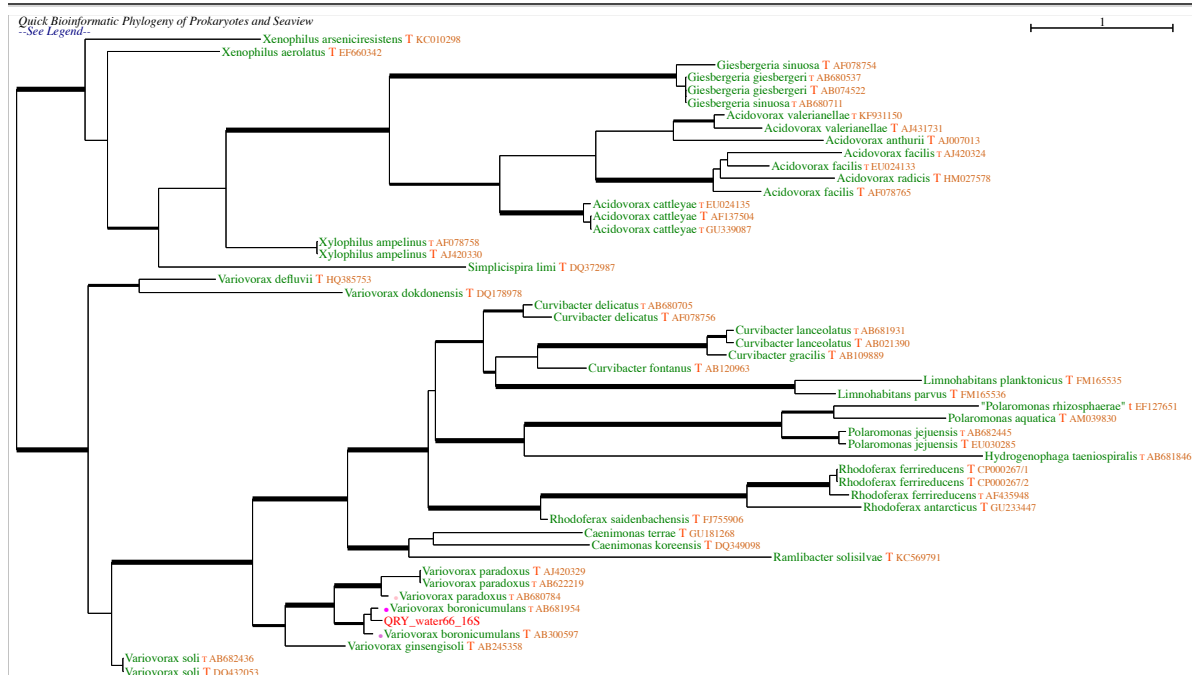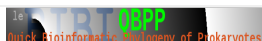[in short](#)[How-to](#)[Cite](#)[Tests sets](#)[Databases](#)[Contact us](#)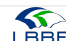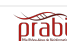

## lebib Quick BioInformatic Phylogeny of Prokaryotes

### Summary of the methods and database used during this session

Analysis Extraction of similar sequences for ingroup sequences: Query

There are 44 sequences in your batch

BLAST using the procaryota\_SSU-rDNA-16S\_TS-stringent database. Trying to extract 50 sequences with expect lower than 0.1

ALIGNMENT using mafft Options : speed oriented

BMGE use for alignment optimization Options :defaults parameters

TREE : phylogenetic tree using fasttree

Evolution model GTR -gamma

## RESULTS

**Results****Query data**Database: **procaryota\_SSU-rDNA-16S\_TS-stringent**

Note: The use of the stringent database (all the GenBank sequences for a given species) may lead to errors due to the low quality identification of some sequences, a careful analysis is necessary.

Original name of the query (from fasta): **QRY\_water67\_16S**, leBiBI ref : ppqIvwPtL**Sequence composition**Length of Query sequence is : **1269**Nucleotide Composition 304 A - 247 T - 302 C - 416 G - **0 N 0.0 % Gaps % =0.0**

GC%=0.56

**Quality of the BLAST analysis**The number of Blast hits is **OK**All is OK, the best BLAST hit length (**1269**) is =100.% of the query length**Biodiversity level**

All extracted sequences appear to belong to Bacteria and their lowest shared taxon is: Bacteria-Actinobacteria-Actinobacteridae-Actinomycetales-Micrococineae-Microbacteriaceae-Microbacterium

**CAUTION!** One genus only in the extracted sequences. No outgroup *may* be pertinent enough for a good phylogeny. You may need to increase the number of desired sequences or use a *more stringent database*.**Phylogenetic tree analysis**Proximal Cluster [**'Microbacterium\_saperdae T Y17236', 'Microbacterium\_oxydans T Y17227', 'Microbacterium\_maritipicum T AM181506'**]**ANALYSIS OF PATRISTIC DISTANCES**

Microbacterium\_maritipicum T AM181506 is the closest sequence based on patristic distances

On the basis of patristic Distances, the **closest** sequence is: Microbacterium\_maritipicum T AM181506 AND is in the proximal cluster**No statistics available for patristic distances between members of the species of the closest sequence**

Remark: the patristic distance to Microbacterium\_maritipicum T AM181506 is in the 75th percentile of the Microbacterium genus inter-species patristic distances : the sequence may correspond to a member of this genus

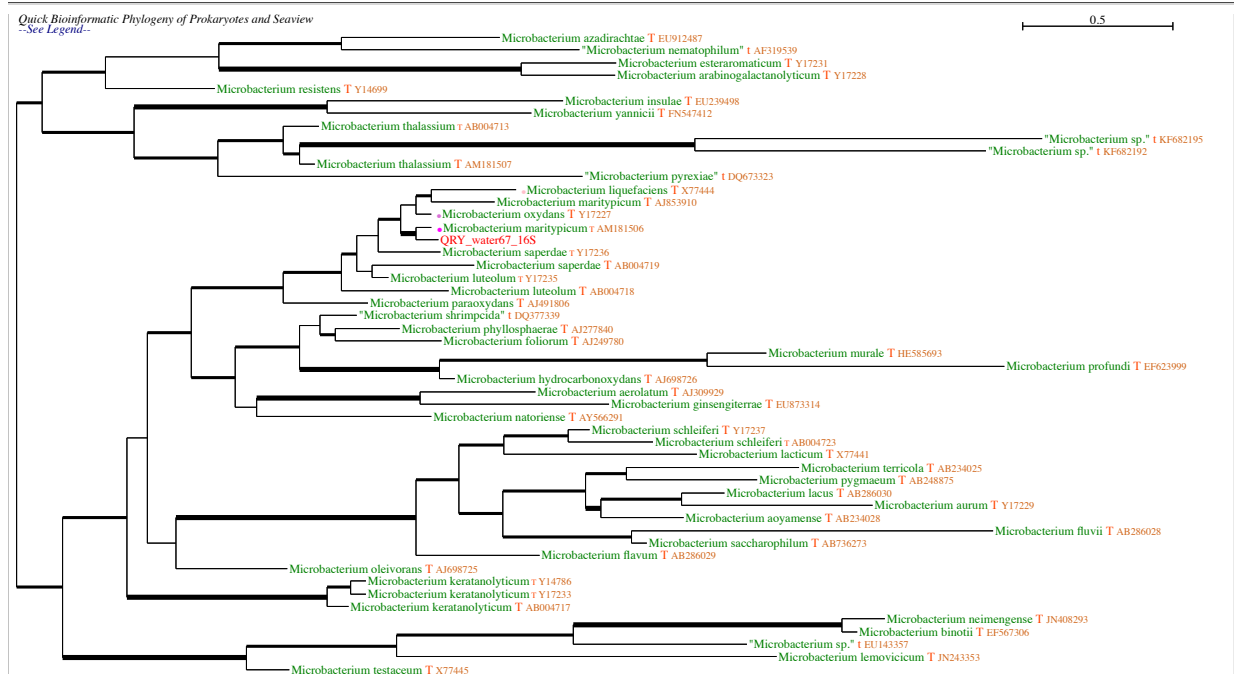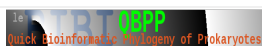[in short](#)[How-to](#)[Cite](#)[Tests sets](#)[Databases](#)[Contact us](#)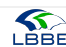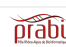

## lebib Quick BioInformatic Phylogeny of Prokaryotes

### Summary of the methods and database used during this session

Analysis Extraction of similar sequences for ingroup sequences: Query

There are 44 sequences in your batch

BLAST using the procaryota\_SSU-rDNA-16S\_TS-stringent database. Trying to extract 50 sequences with expect lower than 0.1

ALIGNMENT using mafft Options : speed oriented

BMGE use for alignment optimization Options :defaults parameters

TREE : phylogenetic tree using fasttree

Evolution model GTR -gamma

## RESULTS

**Results**

**Query data**

Database: **procaryota\_SSU-rDNA-16S\_TS-stringent**

Note: The use of the stringent database (all the GenBank sequences for a given species) may lead to errors due to the low quality identification of some sequences, a careful analysis is necessary.

Original name of the query (from fasta) : **QRY\_water69\_16S**. leBiBI ref : ppqIvwPtL

**Sequence composition**

Length of Query sequence is : **1278**

Nucleotide Composition 307 A - 250 T - 306 C - 415 G - **0 N 0.0 % Gaps % =0.0**

GC%=0.56

**Quality of the BLAST analysis**

The number of Blast hits is **OK**

All is OK, the best BLAST hit length (**1270**) is =99.3% of the query length

**Biodiversity level**

All extracted sequences appear to belong to Bacteria and their lowest shared taxon is: Bacteria-Actinobacteria-Actinobacteridae-Actinomycetales-Micrococineae-Microbacteriaceae-Microbacterium

**CAUTION!** One genus only in the extracted sequences. No outgroup *may* be pertinent enough for a good phylogeny. You may need to increase the number of desired sequences or use a *more stringent database*.

**Phylogenetic tree analysis**

Proximal Cluster [**'Microbacterium\_oxydans T Y17227', 'Microbacterium\_maritipicum T AJ853910', 'Microbacterium\_maritipicum T AM181506'**]

**ANALYSIS OF PATRISTIC DISTANCES**

Microbacterium\_maritipicum T AM181506 is the closest sequence based on patristic distances

On the basis of patristic Distances, the **closest** sequence is: Microbacterium\_maritipicum T AM181506 AND is in the proximal cluster

No statistics available for patristic distances between members of the species of the closest sequence

Remark: the patristic distance to Microbacterium\_maritipicum T AM181506 is in the 75th percentile of the Microbacterium genus inter-species patristic distances : the sequence may correspond to a member of this genus

Quick Bioinformatic Phylogeny of Prokaryotes and Seaview  
--See Legend--

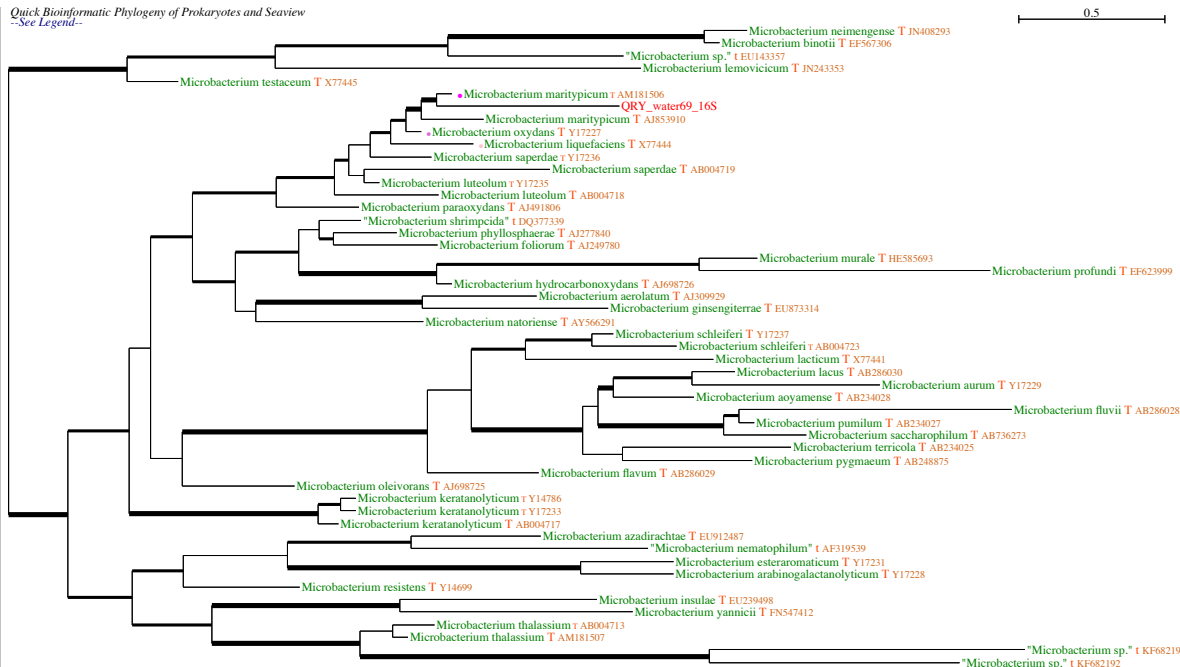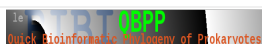

[in short](#)

[How-to](#)

[Cite](#)

[Tests sets](#)

[Databases](#)

[Contact us](#)

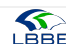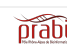

**lebibi Quick BioInformatic Phylogeny of Prokaryotes**

**Summary of the methods and database used during this session**

Analysis Extraction of similar sequences for ingroup sequences: Query

There are 44 sequences in your batch

BLAST using the procaryota\_SSU-rDNA-16S\_TS-stringent database. Trying to extract 50 sequences with expect lower than 0.1

ALIGNMENT using mafft Options : speed oriented

BMGE use for alignment optimization Options :defaults parameters

TREE : phylogenetic tree using fasttree

Evolution model GTR -gamma

**RESULTS**

**Results****Query data**Database: **procaryota\_SSU-rDNA-16S\_TS-stringent**

Note: The use of the stringent database (all the GenBank sequences for a given species) may lead to errors due to the low quality identification of some sequences, a careful analysis is necessary.

Original name of the query (from fasta): **QRY\_water35\_16S**, leBiBI ref : ppqIvwPtL**Sequence composition**Length of Query sequence is : **1279**Nucleotide Composition 316 A - 244 T - 306 C - 413 G - **0 N 0.0 % Gaps % =0.0**

GC%=0.56

**Quality of the BLAST analysis**The number of Blast hits is **OK**All is OK, the best BLAST hit length (**1279**) is =100.% of the query length**Biodiversity level**

All extracted sequences appear to belong to Bacteria and their lowest shared taxon is: Bacteria-Actinobacteria-Actinobacteridae-Actinomycetales-Micrococineae-Microbacteriaceae-Microbacterium

**CAUTION!** One genus only in the extracted sequences. No outgroup *may* be pertinent enough for a good phylogeny. You may need to increase the number of desired sequences or use a *more stringent database*.**Phylogenetic tree analysis**Proximal Cluster [**'Microbacterium\_lacticum T X77441'**]**ANALYSIS OF PATRISTIC DISTANCES**

Microbacterium\_lacticum T X77441 is the closest sequence based on patristic distances

On the basis of patristic Distances, the **closest** sequence is: Microbacterium\_lacticum T X77441 AND is in the proximal cluster

No statistics available for patristic distances between members of the species of the closest sequence

Remark: the patristic distance to Microbacterium\_lacticum T X77441 is in the 75th percentile of the Microbacterium genus inter-species patristic distances : the sequence may correspond to a member of this genus

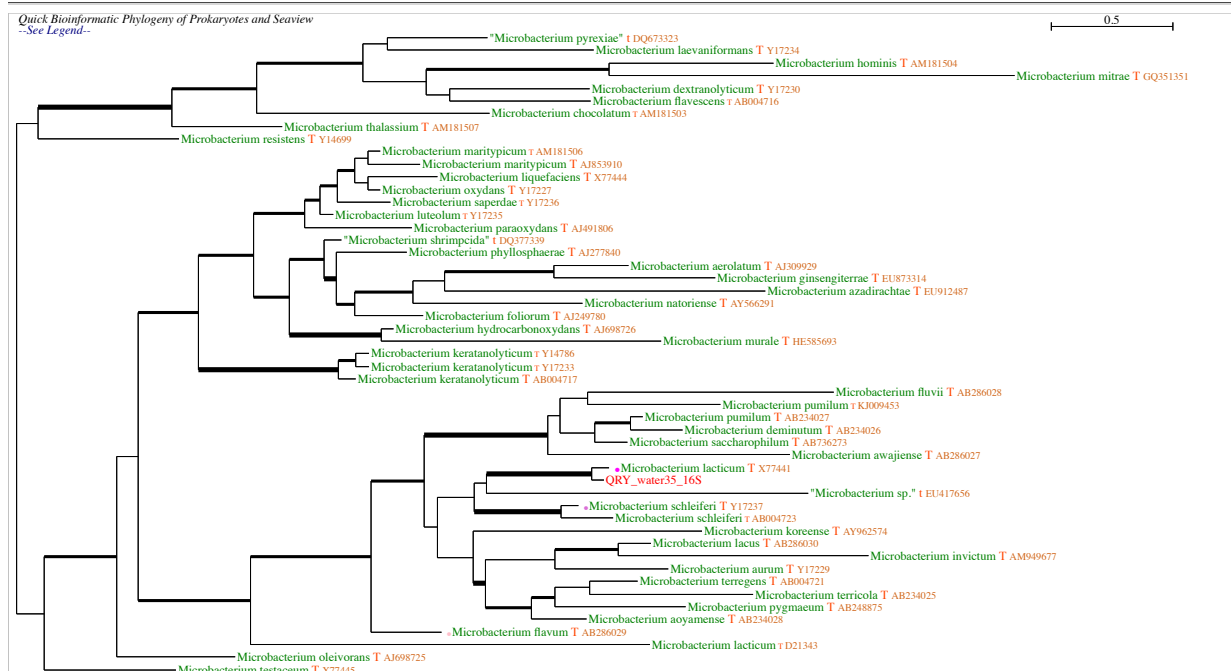[in short](#)[How-to](#)[Cite](#)[Tests sets](#)[Databases](#)[Contact us](#)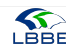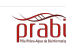**lebib Quick BioInformatic Phylogeny of Prokaryotes****Summary of the methods and database used during this session**

Analysis Extraction of similar sequences for ingroup sequences: Query

There are 44 sequences in your batch

BLAST using the procaryota\_SSU-rDNA-16S\_TS-stringent database. Trying to extract 50 sequences with expect lower than 0.1

ALIGNMENT using mafft Options : speed oriented

BMGE use for alignment optimization Options : defaults parameters

TREE : phylogenetic tree using fasttree

Evolution model GTR -gamma

**RESULTS**

**Results****Query data**Database: **procaryota\_SSU-rDNA-16S\_TS-stringent**

Note: The use of the stringent database (all the GenBank sequences for a given species) may lead to errors due to the low quality identification of some sequences, a careful analysis is necessary.

Original name of the query (from fasta): **QRY\_water70\_16S**, leBiBI ref: ppqIvwPtL**Sequence composition**Length of Query sequence is : **1284**Nucleotide Composition 317 A - 246 T - 308 C - 413 G - **0 N 0.0 % Gaps % =0.0**  
GC%=0.56**Quality of the BLAST analysis**The number of Blast hits is **OK**All is OK, the best BLAST hit length (**1276**) is =99.3% of the query length**Biodiversity level**

All extracted sequences appear to belong to Bacteria and their lowest shared taxon is: Bacteria-Actinobacteria-Actinobacteridae-Actinomycetales-Micrococineae-Microbacteriaceae-Microbacterium

**CAUTION!** One genus only in the extracted sequences. No outgroup *may* be pertinent enough for a good phylogeny. You may need to increase the number of desired sequences or use a *more stringent database*.**Phylogenetic tree analysis**Proximal Cluster ['**Microbacterium\_lacticum T X77441**']**ANALYSIS OF PATRISTIC DISTANCES**

Microbacterium\_lacticum T X77441 is the closest sequence based on patristic distances

On the basis of patristic Distances, the **closest** sequence is: Microbacterium\_lacticum T X77441 AND is in the proximal cluster**No statistics available for patristic distances between members of the species of the closest sequence**

Remark: the patristic distance to Microbacterium\_lacticum T X77441 is in the 75th percentile of the Microbacterium genus inter-species patristic distances : the sequence may correspond to a member of this genus

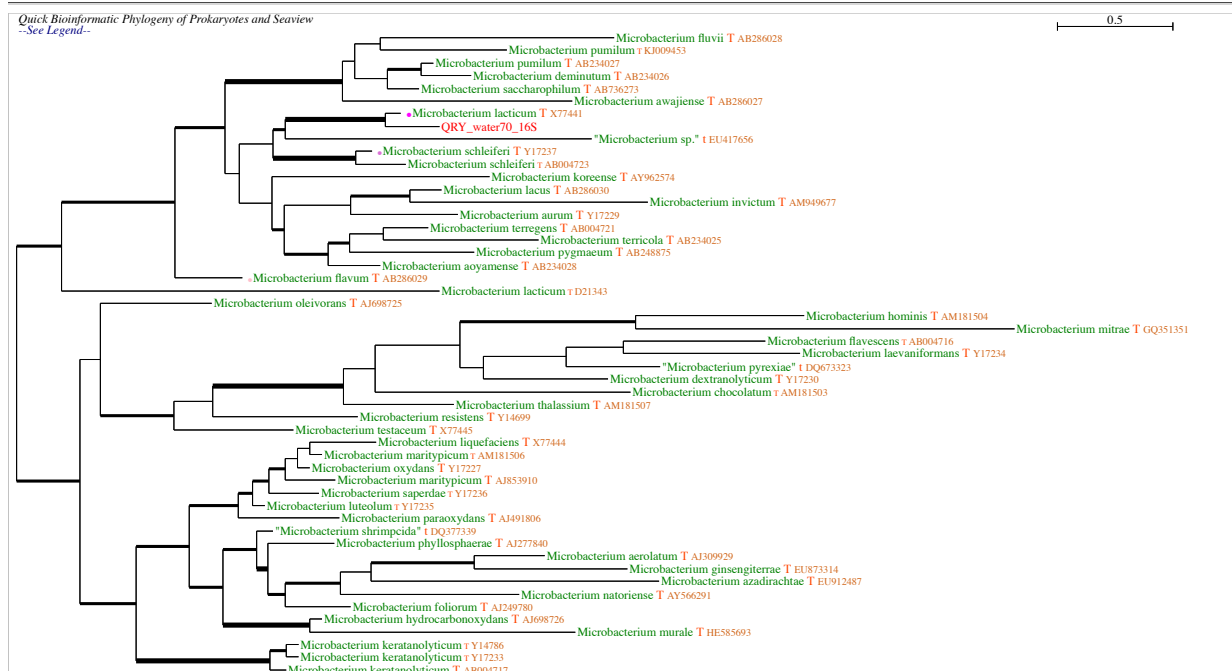[in short](#)[How-to](#)[Cite](#)[Tests sets](#)[Databases](#)[Contact us](#)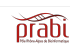

## lebib Quick BioInformatic Phylogeny of Prokaryotes

### Summary of the methods and database used during this session

Analysis Extraction of similar sequences for ingroup sequences: Query

There are 44 sequences in your batch

BLAST using the procaryota\_SSU-rDNA-16S\_TS-stringent database. Trying to extract 50 sequences with expect lower than 0.1

ALIGNMENT using mafft Options : speed oriented

BMGE use for alignment optimization Options : defaults parameters

TREE : phylogenetic tree using fasttree

Evolution model GTR -gamma

## RESULTS

**Results**

**Query data**

Database: **procaryota\_SSU-rDNA-16S\_TS-stringent**

Note: The use of the stringent database (all the GenBank sequences for a given species) may lead to errors due to the low quality identification of some sequences, a careful analysis is necessary.

Original name of the query (from fasta): **QRY\_water71\_16S**. leBiBI ref : ppqIvwPtL

**Sequence composition**

Length of Query sequence is : **1269**

Nucleotide Composition 305 A - 248 T - 299 C - 417 G - **0 N 0.0 % Gaps % =0.0**

GC%=0.56

**Quality of the BLAST analysis**

The number of Blast hits is **OK**

All is OK, the best BLAST hit length (**1270**) is =100.% of the query length

**Biodiversity level**

All extracted sequences appear to belong to Bacteria and their lowest shared taxon is: Bacteria-Actinobacteria-Actinobacteridae-Actinomycetales-Micrococineae-Microbacteriaceae-Microbacterium

**CAUTION !** One genus only in the extracted sequences. No outgroup *may* be pertinent enough for a good phylogeny. You may need to increase the number of desired sequences or use a *more stringent database*.

**Phylogenetic tree analysis**

Proximal Cluster [**'Microbacterium\_oxydans T Y17227'**, **'Microbacterium\_maritipicum T AJ853910'**, **'Microbacterium\_maritipicum T AM181506'**]

**ANALYSIS OF PATRISTIC DISTANCES**

Microbacterium\_maritipicum T AM181506 is the closest sequence based on patristic distances

On the basis of patristic Distances, the **closest** sequence is: Microbacterium\_maritipicum T AM181506 AND is in the proximal cluster

No statistics available for patristic distances between members of the species of the closest sequence

Remark: the patristic distance to Microbacterium\_maritipicum T AM181506 is in the 75th percentile of the Microbacterium genus inter-species patristic distances : the sequence may correspond to a member of this genus

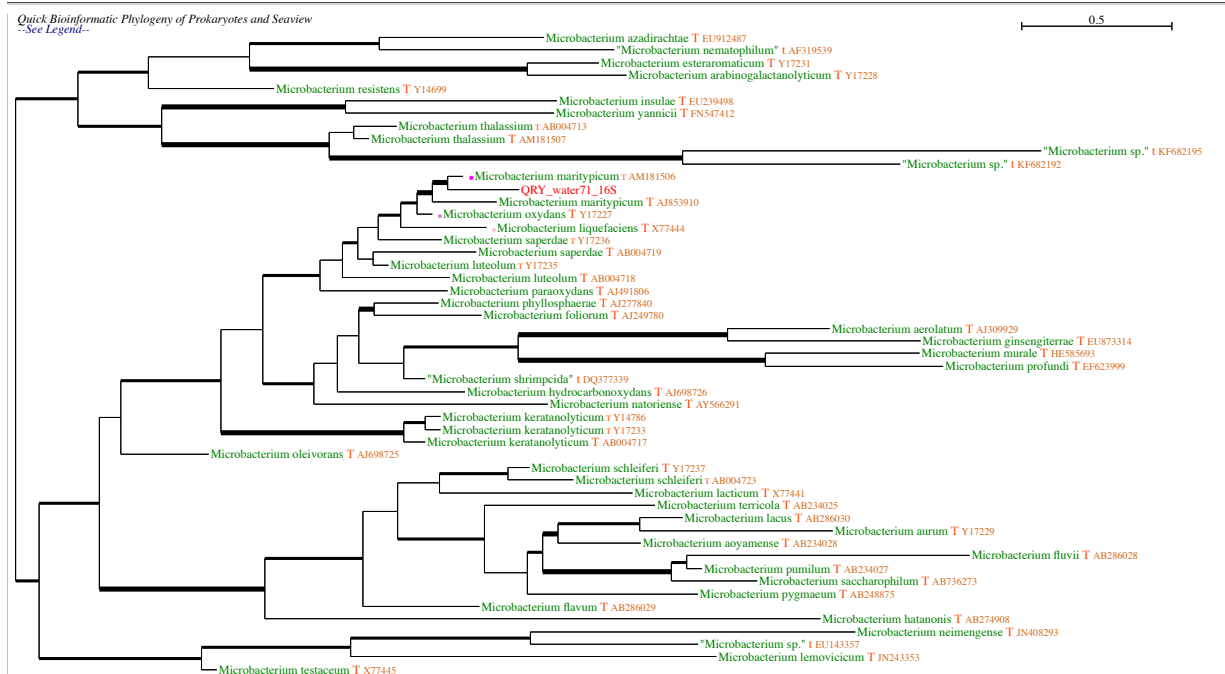

Quick Bioinformatic Phylogeny of Prokaryotes and Seaview 0.5

[in short](#) | 
 [How-to](#) | 
 [Cite](#) | 
 [Tests sets](#) | 
 [Databases](#) | 
 [Contact us](#) | 
  | 
 

## lebibi Quick BioInformatic Phylogeny of Prokaryotes

### Summary of the methods and database used during this session

Analysis Extraction of similar sequences for ingroup sequences: Query

There are 44 sequences in your batch

BLAST using the procaryota\_SSU-rDNA-16S\_TS-stringent database. Trying to extract 50 sequences with expect lower than 0.1

ALIGNMENT using mafft Options : speed oriented

BMGE use for alignment optimization Options :defaults parameters

TREE : phylogenetic tree using fasttree

Evolution model GTR -gamma

## RESULTS



**Results**

**Query data**

Database: **procaryota\_SSU-rDNA-16S\_TS-stringent**

Note: The use of the stringent database (all the GenBank sequences for a given species) may lead to errors due to the low quality identification of some sequences, a careful analysis is necessary.

Original name of the query (from fasta) : **QRY\_water72\_16S**. leBiBI ref : ppqIvwPtL

**Sequence composition**

Length of Query sequence is : **1277**

Nucleotide Composition 312 A - 246 T - 309 C - 410 G - **0 N 0.0 % Gaps % =0.0**

GC%=0.56

**Quality of the BLAST analysis**

The number of Blast hits is **OK**

All is OK, the best BLAST hit length (**1270**) is =99.4% of the query length

**Biodiversity level**

All extracted sequences appear to belong to Bacteria and their lowest shared taxon is: Bacteria-Actinobacteria-Actinobacteridae-Actinomycetales-Micrococineae-Microbacteriaceae-Microbacterium

**CAUTION!** One genus only in the extracted sequences. No outgroup *may* be pertinent enough for a good phylogeny. You may need to increase the number of desired sequences or use a *more stringent database*.

**Phylogenetic tree analysis**

Proximal Cluster [**'Microbacterium\_sp.? t EU417656'**, **'Microbacterium\_lacticum T X77441'**]

**ANALYSIS OF PATRISTIC DISTANCES**

Microbacterium\_lacticum T X77441 is the closest sequence based on patristic distances

On the basis of patristic Distances, the **closest** sequence is: Microbacterium\_lacticum T X77441 AND is in the proximal cluster

No statistics available for patristic distances between members of the species of the closest sequence

Remark: the patristic distance to Microbacterium\_lacticum T X77441 is in the 75th percentile of the Microbacterium genus inter-species patristic distances : the sequence may correspond to a member of this genus

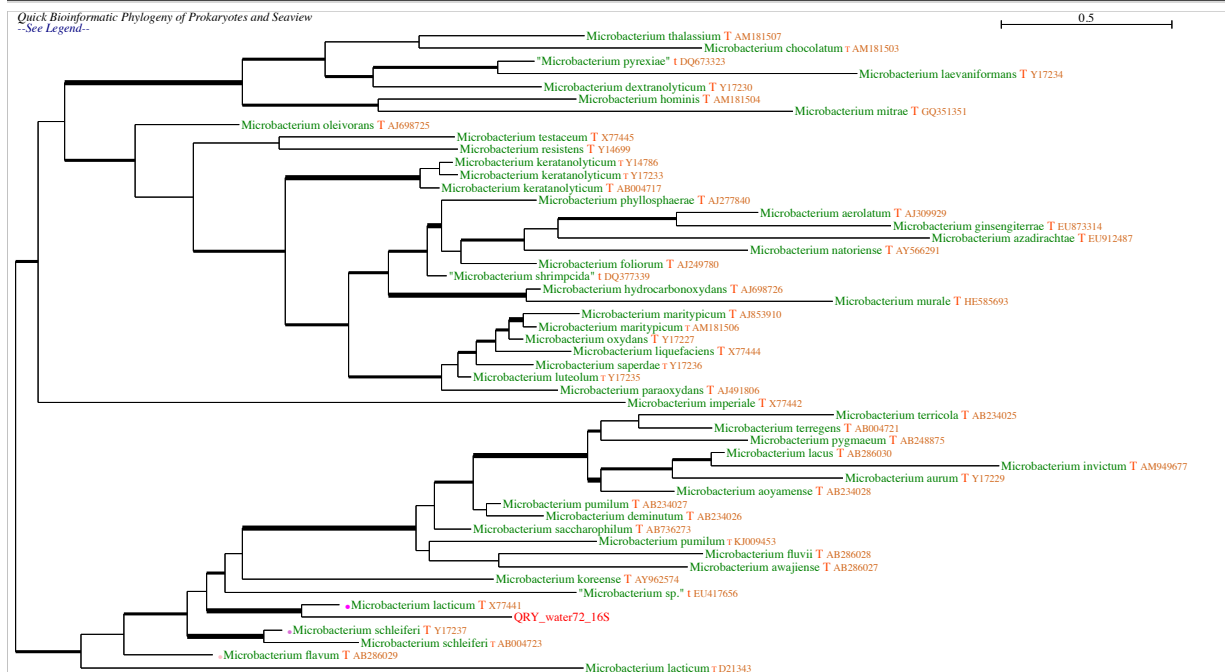

[in short](#)

[How-to](#)

[Cite](#)

[Tests sets](#)

[Databases](#)

[Contact us](#)

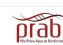

**lebibi Quick BioInformatic Phylogeny of Prokaryotes**

**Summary of the methods and database used during this session**

Analysis Extraction of similar sequences for ingroup sequences: Query

There are 44 sequences in your batch

BLAST using the procaryota\_SSU-rDNA-16S\_TS-stringent database. Trying to extract 50 sequences with expect lower than 0.1

ALIGNMENT using mafft Options : speed oriented

BMGE use for alignment optimization Options : defaults parameters

TREE : phylogenetic tree using fasttree

Evolution model GTR -gamma

**RESULTS**

**Results**

**Query data**

Database: **procaryota\_SSU-rDNA-16S\_TS-stringent**

Note: The use of the stringent database (all the GenBank sequences for a given species) may lead to errors due to the low quality identification of some sequences, a careful analysis is necessary.

Original name of the query (from fasta): **QRY\_water73\_16S**. leBiBI ref : ppqIvwPtL

**Sequence composition**

Length of Query sequence is : **1268**

Nucleotide Composition 314 A - 244 T - 302 C - 408 G - **0 N 0.0 % Gaps % =0.0**  
GC%=0.55

**Quality of the BLAST analysis**

The number of Blast hits is **OK**

All is OK, the best BLAST hit length (**1266**) is =99.8% of the query length

**Biodiversity level**

All extracted sequences appear to belong to Bacteria and their lowest shared taxon is: Bacteria-Actinobacteria-Actinobacteridae-Actinomycetales-Micrococccineae-Microbacteriaceae  
More than one genus in the extracted sequences. An outgroup will be present in the tree.

**Phylogenetic tree analysis**

Proximal Cluster [**'Microbacterium\_aurum T Y17229'**]

**ANALYSIS OF PATRISTIC DISTANCES**

Microbacterium\_aurum T Y17229 is the closest sequence based on patristic distances

On the basis of patristic Distances, the **closest** sequence is: Microbacterium\_aurum T Y17229 AND is in the proximal cluster

No statistics available for patristic distances between members of the species of the closest sequence

Remark: the patristic distance to Microbacterium\_aurum T Y17229 is in the 75th percentile of the Microbacterium genus inter-species patristic distances : the sequence may correspond to a member of this genus

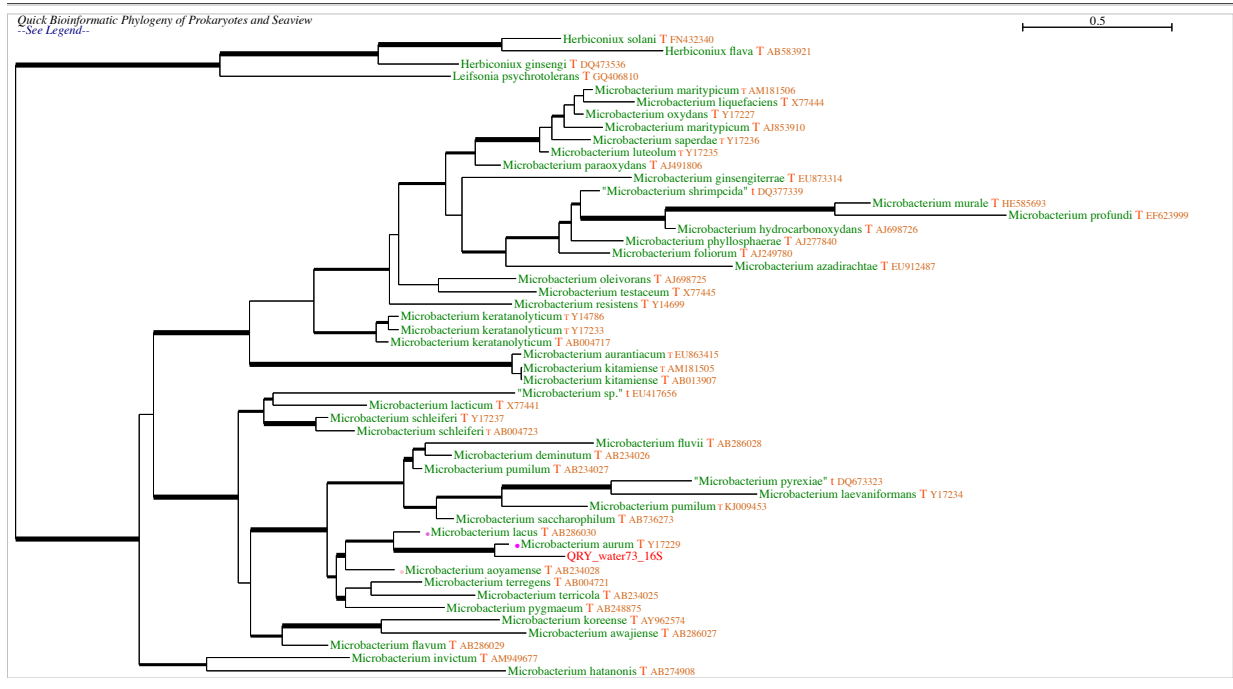

[in short](#)
[How-to](#)
[Cite](#)
[Tests sets](#)
[Databases](#)
[Contact us](#)

**lebibi Quick BioInformatic Phylogeny of Prokaryotes**

**Summary of the methods and database used during this session**

Analysis Extraction of similar sequences for ingroup sequences: Query  
 There are 44 sequences in your batch  
 BLAST using the procaryota\_SSU-rDNA-16S\_TS-stringent database. Trying to extract 50 sequences with expect lower than 0.1  
 ALIGNMENT using mafft Options : speed oriented  
 BMGE use for alignment optimization Options :defaults parameters  
 TREE : phylogenetic tree using fasttree  
 Evolution model GTR -gamma

**RESULTS**

**Results**

**Query data**

Database: **procaryota\_SSU-rDNA-16S\_TS-stringent**

Note: The use of the stringent database (all the GenBank sequences for a given species) may lead to errors due to the low quality identification of some sequences, a careful analysis is necessary.

Original name of the query (from fasta) : **QRY\_water74\_16S**. leBiBI ref : ppqIvwPtL

**Sequence composition**

Length of Query sequence is : **1269**

Nucleotide Composition 316 A - 245 T - 302 C - 406 G - **0 N 0.0 % Gaps % =0.0**  
GC%=0.55

**Quality of the BLAST analysis**

The number of Blast hits is **OK**

All is OK, the best BLAST hit length (**1269**) is =100.% of the query length

**Biodiversity level**

All extracted sequences appear to belong to Bacteria and their lowest shared taxon is: Bacteria-Actinobacteria-Actinobacteridae-Actinomycetales-Micrococceae-Microbacteriaceae  
More than one genus in the extracted sequences. An outgroup will be present in the tree.

**Phylogenetic tree analysis**

Proximal Cluster [**'Microbacterium\_hatanonis T AB274908', 'Microbacterium\_aurum T Y17229'**]

**ANALYSIS OF PATRISTIC DISTANCES**

Microbacterium\_aurum T Y17229 is the closest sequence based on patristic distances

On the basis of patristic Distances, the **closest** sequence is: Microbacterium\_aurum T Y17229 AND is in the proximal cluster

No statistics available for patristic distances between members of the species of the closest sequence

Remark: the patristic distance to Microbacterium\_aurum T Y17229 is in the 75th percentile of the Microbacterium genus inter-species patristic distances : the sequence may correspond to a member of this genus

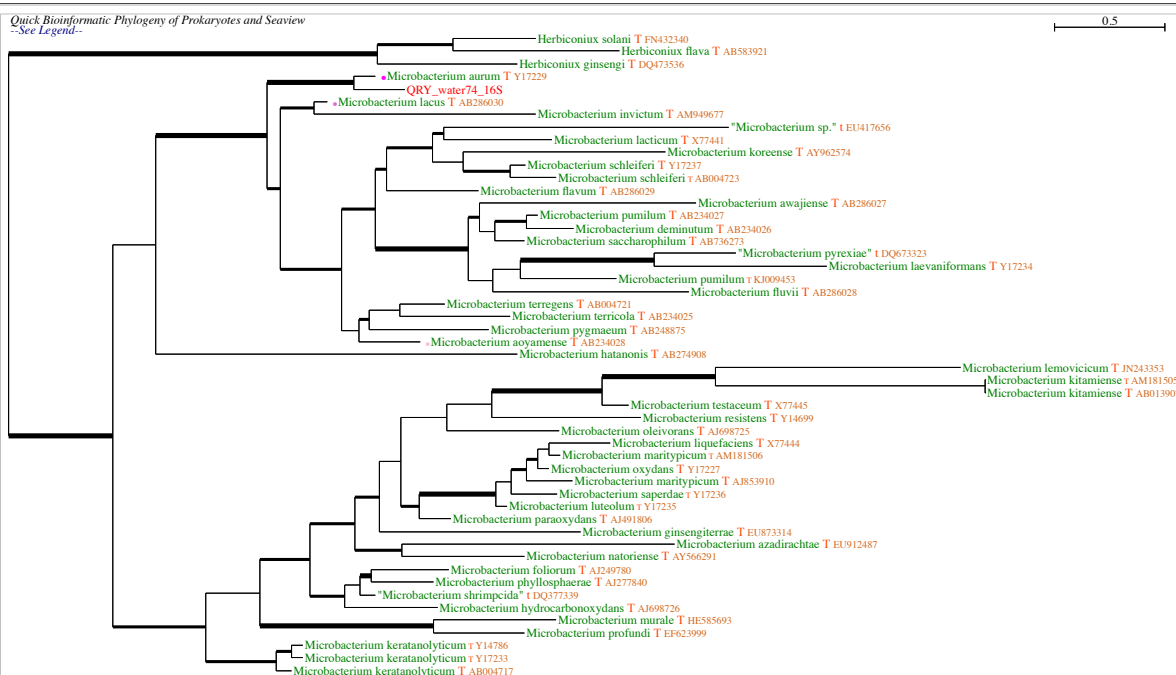

[in short](#)

[How-to](#)

[Cite](#)

[Tests sets](#)

[Databases](#)

[Contact us](#)

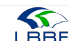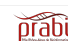

**lebibi Quick BioInformatic Phylogeny of Prokaryotes**

**Summary of the methods and database used during this session**

Analysis Extraction of similar sequences for ingroup sequences: Query

There are 44 sequences in your batch

BLAST using the procaryota\_SSU-rDNA-16S\_TS-stringent database. Trying to extract 50 sequences with expect lower than 0.1

ALIGNMENT using mafft Options : speed oriented

BMGE use for alignment optimization Options :defaults parameters

TREE : phylogenetic tree using fasttree

Evolution model GTR -gamma

**RESULTS**

**Results**

**Query data**

Database: **procaryota\_SSU-rDNA-16S\_TS-stringent**

Note: The use of the stringent database (all the GenBank sequences for a given species) may lead to errors due to the low quality identification of some sequences, a careful analysis is necessary.

Original name of the query (from fasta) : **QRY\_water75\_16S**. leBiBI ref : ppqIvwPtL

**Sequence composition**

Length of Query sequence is : **1268**

Nucleotide Composition 303 A - 248 T - 300 C - 417 G - **0 N 0.0 % Gaps % =0.0**  
GC%=0.56

**Quality of the BLAST analysis**

The number of Blast hits is **OK**

All is OK, the best BLAST hit length (**1266**) is =99.8% of the query length

**Biodiversity level**

All extracted sequences appear to belong to Bacteria and their lowest shared taxon is: Bacteria-Actinobacteria-Actinobacteridae-Actinomycetales-Micrococccineae-Microbacteriaceae-Microbacterium

**CAUTION!** One genus only in the extracted sequences. No outgroup *may* be pertinent enough for a good phylogeny. You may need to increase the number of desired sequences or use a *more stringent database*.

**Phylogenetic tree analysis**

Proximal Cluster [**'Microbacterium\_maritipicum T AM181506'**]

**ANALYSIS OF PATRISTIC DISTANCES**

Microbacterium\_maritipicum T AM181506 is the closest sequence based on patristic distances

On the basis of patristic Distances, the **closest** sequence is: Microbacterium\_maritipicum T AM181506 AND is in the proximal cluster

No statistics available for patristic distances between members of the species of the closest sequence

Remark: the patristic distance to Microbacterium\_maritipicum T AM181506 is in the 75th percentile of the Microbacterium genus inter-species patristic distances : the sequence may correspond to a member of this genus

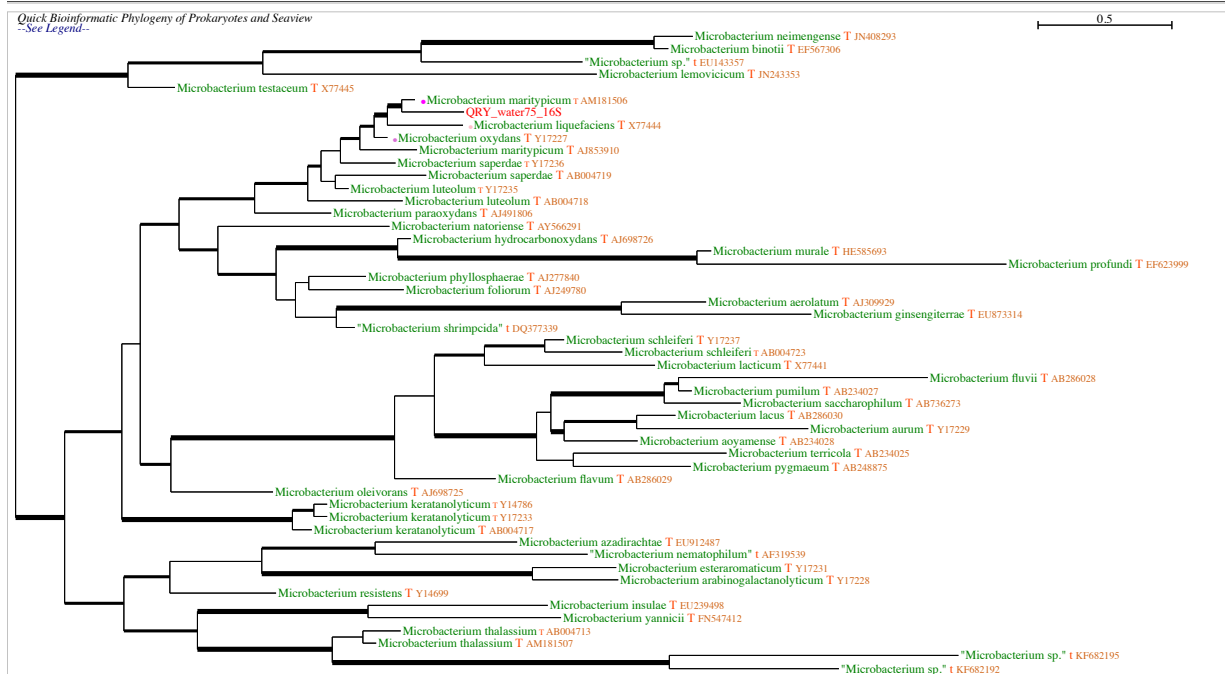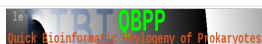

[in short](#)

[How-to](#)

[Cite](#)

[Tests sets](#)

[Databases](#)

[Contact us](#)



**lebibi Quick BioInformatic Phylogeny of Prokaryotes**

**Summary of the methods and database used during this session**

Analysis Extraction of similar sequences for ingroup sequences: Query

There are 44 sequences in your batch

BLAST using the procaryota\_SSU-rDNA-16S\_TS-stringent database. Trying to extract 50 sequences with expect lower than 0.1

ALIGNMENT using mafft Options : speed oriented

BMGE use for alignment optimization Options :defaults parameters

TREE : phylogenetic tree using fasttree

Evolution model GTR -gamma

**RESULTS**

**Results****Query data**Database: **procaryota\_SSU-rDNA-16S\_TS-stringent**

Note: The use of the stringent database (all the GenBank sequences for a given species) may lead to errors due to the low quality identification of some sequences, a careful analysis is necessary.

Original name of the query (from fasta): **QRY\_water76\_16S**, leBiBI ref : ppqIvwPtL**Sequence composition**Length of Query sequence is : **1270**Nucleotide Composition 313 A - 245 T - 303 C - 409 G - **0 N 0.0 % Gaps % =0.0**

GC%=0.56

**Quality of the BLAST analysis**The number of Blast hits is **OK**All is OK, the best BLAST hit length (**1266**) is =99.6% of the query length**Biodiversity level**

All extracted sequences appear to belong to Bacteria and their lowest shared taxon is: Bacteria-Actinobacteria-Actinobacteridae-Actinomycetales-Micrococineae-Microbacteriaceae-Microbacterium

**CAUTION!** One genus only in the extracted sequences. No outgroup *may* be pertinent enough for a good phylogeny. You may need to increase the number of desired sequences or use a *more stringent database*.**Phylogenetic tree analysis**

Proximal Cluster ['Microbacterium\_lacticum T X77441']

**ANALYSIS OF PATRISTIC DISTANCES**

Microbacterium\_lacticum T X77441 is the closest sequence based on patristic distances

On the basis of patristic Distances, the **closest** sequence is: Microbacterium\_lacticum T X77441 AND is in the proximal cluster**No statistics available for patristic distances between members of the species of the closest sequence**

Remark: the patristic distance to Microbacterium\_lacticum T X77441 is in the 75th percentile of the Microbacterium genus inter-species patristic distances : the sequence may correspond to a member of this genus

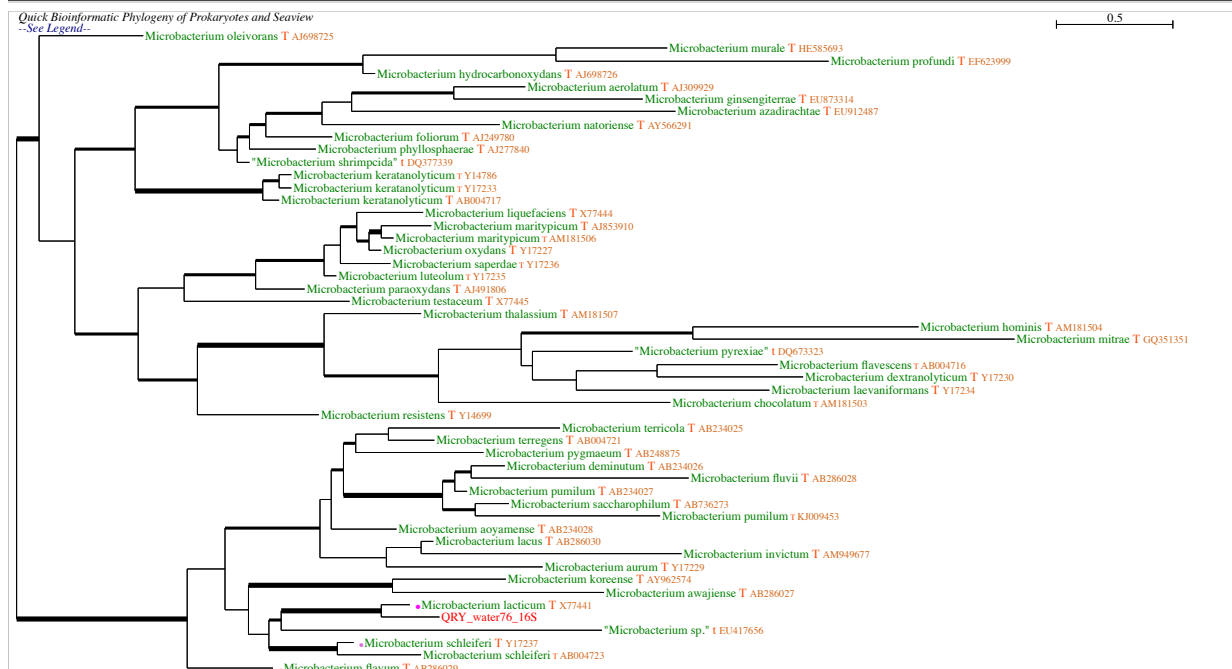[in short](#)[How-to](#)[Cite](#)[Tests sets](#)[Databases](#)[Contact us](#)

## lebib Quick BioInformatic Phylogeny of Prokaryotes

### Summary of the methods and database used during this session

Analysis Extraction of similar sequences for ingroup sequences: Query

There are 44 sequences in your batch

BLAST using the procaryota\_SSU-rDNA-16S\_TS-stringent database. Trying to extract 50 sequences with expect lower than 0.1

ALIGNMENT using mafft Options : speed oriented

BMGE use for alignment optimization Options : defaults parameters

TREE : phylogenetic tree using fasttree

Evolution model GTR -gamma

## RESULTS

**Results**

**Query data**

Database: **procaryota\_SSU-rDNA-16S\_TS-stringent**

Note: The use of the stringent database (all the GenBank sequences for a given species) may lead to errors due to the low quality identification of some sequences, a careful analysis is necessary.

Original name of the query (from fasta) : **QRY\_water77\_16S**. leBiBI ref : ppqIvwPtL

**Sequence composition**

Length of Query sequence is : **1230**

Nucleotide Composition 294 A - 244 T - 297 C - 395 G - **0 N 0.0 % Gaps % =0.0**

GC%=0.56

**Quality of the BLAST analysis**

The number of Blast hits is **OK**

All is OK, the best BLAST hit length (**1230**) is =100.% of the query length

**Biodiversity level**

All extracted sequences appear to belong to Bacteria and their lowest shared taxon is: Bacteria-Proteobacteria-Alphaproteobacteria-Rhizobiales-Methylobacteriaceae-Methylobacterium **CAUTION!** One genus only in the extracted sequences. No outgroup *may* be pertinent enough for a good phylogeny. You may need to increase the number of desired sequences or use a *more stringent database*.

**Phylogenetic tree analysis**

Proximal Cluster ['Methylobacterium\_thiocyanatum T U58018', 'Methylobacterium\_rhodesianum T AB175643', 'Methylobacterium\_rhodesianum T AB175642']

**ANALYSIS OF PATRISTIC DISTANCES**

Methylobacterium\_rhodesianum T AB175643 is the closest sequence based on patristic distances

On the basis of patristic Distances, the **closest** sequence is: Methylobacterium\_rhodesianum T AB175643 AND is in the proximal cluster

No statistics available for patristic distances between members of the species of the closest sequence

Remark: the patristic distance to Methylobacterium\_rhodesianum T AB175643 is in the 75th percentile of the Methylobacterium genus inter-species patristic distances : the sequence may correspond to a member of this genus

The closest sequence based on patristic distances (Methylobacterium\_rhodesianum T AB175643) is NOT the FIRST BLAST hit.

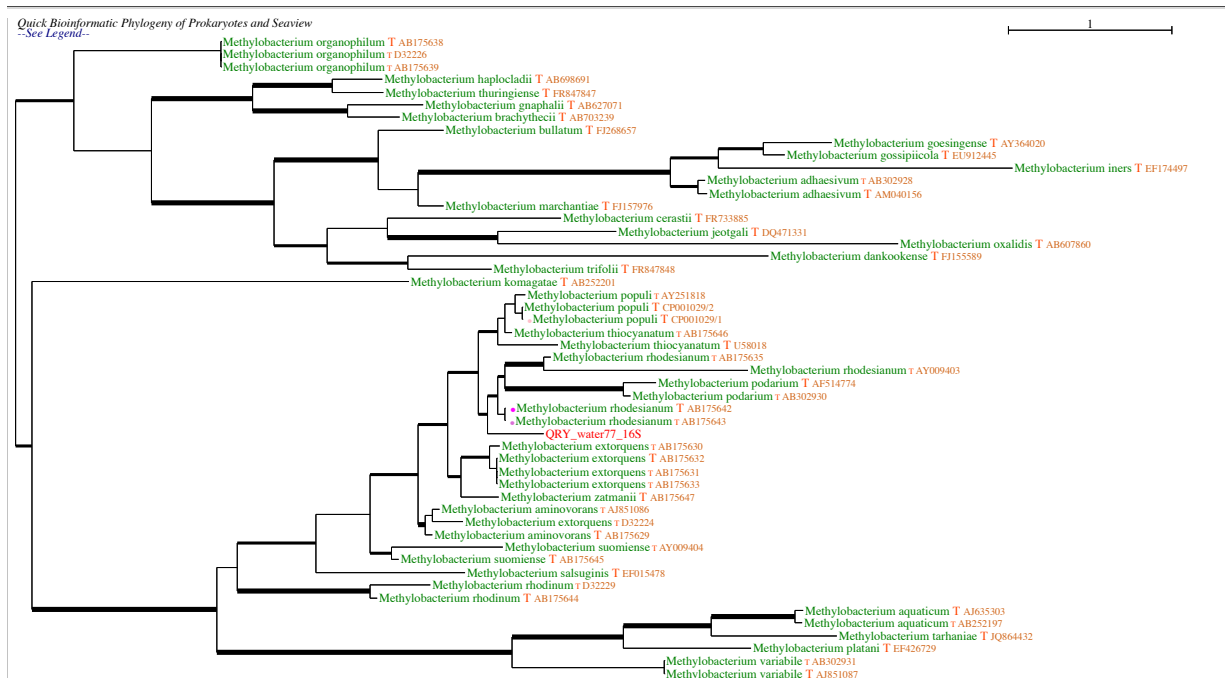

[Quick Bioinformatic Phylogeny of Prokaryotes](#) | 
 [in short](#) | 
 [How-to](#) | 
 [Cite](#) | 
 [Tests sets](#) | 
 [Databases](#) | 
 [Contact us](#) | 
  | 
 

**lebibi Quick BioInformatic Phylogeny of Prokaryotes**

**Summary of the methods and database used during this session**

Analysis Extraction of similar sequences for ingroup sequences: Query  
 There are 44 sequences in your batch  
 BLAST using the procaryota\_SSU-rDNA-16S\_TS-stringent database. Trying to extract 50 sequences with expect lower than 0.1  
 ALIGNMENT using mafft Options : speed oriented  
 BMGE use for alignment optimization Options :defaults parameters  
 TREE : phylogenetic tree using fasttree  
 Evolution model GTR -gamma

**RESULTS**

**Results**

**Query data**

Database: **procaryota\_SSU-rDNA-16S\_TS-stringent**

Note: The use of the stringent database (all the GenBank sequences for a given species) may lead to errors due to the low quality identification of some sequences, a careful analysis is necessary.

Original name of the query (from fasta) : **QRY\_water78\_16S**, leBiBI ref : ppqIvwPtL

**Sequence composition**

Length of Query sequence is : **1270**

Nucleotide Composition 313 A - 242 T - 304 C - 411 G - **0 N 0.0 % Gaps % =0.0**

GC%=0.56

**Quality of the BLAST analysis**

The number of Blast hits is **OK**

All is OK, the best BLAST hit length (**1270**) is =100.% of the query length

**Biodiversity level**

All extracted sequences appear to belong to Bacteria and their lowest shared taxon is: Bacteria-Actinobacteria-Actinobacteridae-Actinomycetales-Micrococccineae-Microbacteriaceae-Microbacterium

**CAUTION!** One genus only in the extracted sequences. No outgroup *may* be pertinent enough for a good phylogeny. You may need to increase the number of desired sequences or use a *more stringent database*.

**Phylogenetic tree analysis**

Proximal Cluster [**Microbacterium\_lacticum T X77441**]

**ANALYSIS OF PATRISTIC DISTANCES**

Microbacterium\_lacticum T X77441 is the closest sequence based on patristic distances

On the basis of patristic Distances, the **closest** sequence is: Microbacterium\_lacticum T X77441 AND is in the proximal cluster

No statistics available for patristic distances between members of the species of the closest sequence

Remark: the patristic distance to Microbacterium\_lacticum T X77441 is in the 75th percentile of the Microbacterium genus inter-species patristic distances : the sequence may correspond to a member of this genus

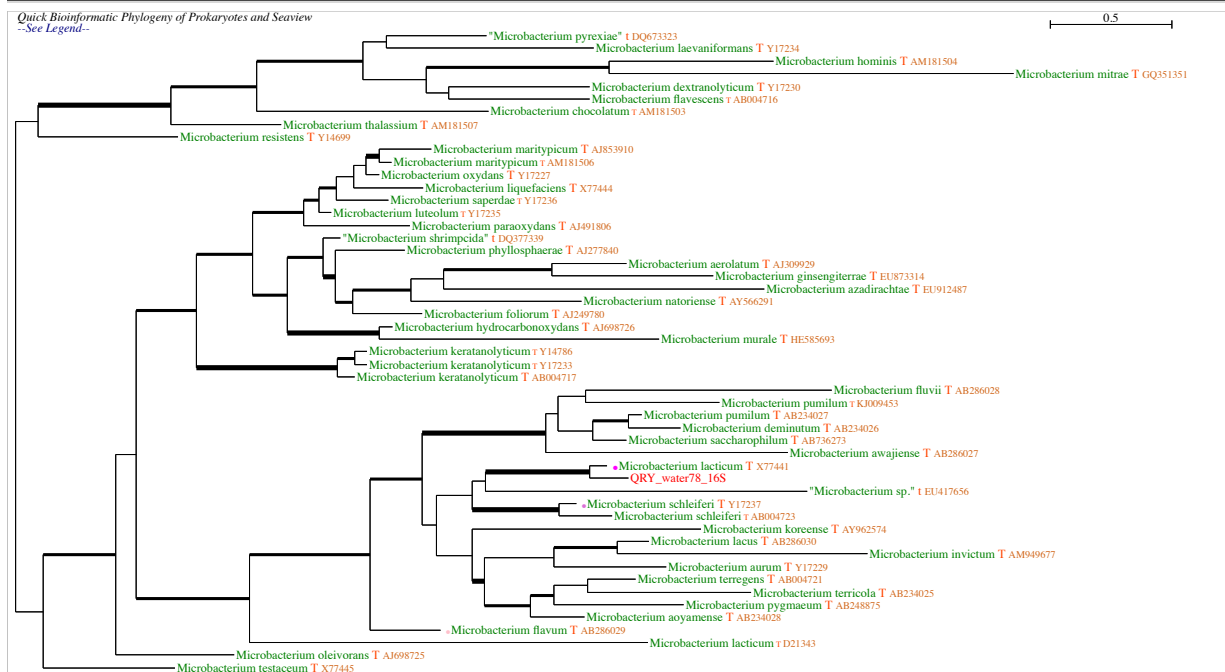

[in short](#)

[How-to](#)

[Cite](#)

[Tests sets](#)

[Databases](#)

[Contact us](#)



**lebibi Quick BioInformatic Phylogeny of Prokaryotes**

**Summary of the methods and database used during this session**

Analysis Extraction of similar sequences for ingroup sequences: Query

There are 44 sequences in your batch

BLAST using the procaryota\_SSU-rDNA-16S\_TS-stringent database. Trying to extract 50 sequences with expect lower than 0.1

ALIGNMENT using mafft Options : speed oriented

BMGE use for alignment optimization Options : defaults parameters

TREE : phylogenetic tree using fasttree

Evolution model GTR -gamma

**RESULTS**

**Results**

**Query data**

Database: **procaryota\_SSU-rDNA-16S\_TS-stringent**

Note: The use of the stringent database (all the GenBank sequences for a given species) may lead to errors due to the low quality identification of some sequences, a careful analysis is necessary.

Original name of the query (from fasta) : **QRY\_water80\_16S**, leBiBI ref : ppqIvwPtL

**Sequence composition**

Length of Query sequence is : **1269**

Nucleotide Composition 316 A - 241 T - 303 C - 409 G - **0 N 0.0 % Gaps % =0.0**  
GC%=0.56

**Quality of the BLAST analysis**

The number of Blast hits is **OK**

All is OK, the best BLAST hit length (**1265**) is =99.6% of the query length

**Biodiversity level**

All extracted sequences appear to belong to Bacteria and their lowest shared taxon is: Bacteria-Actinobacteria-Actinobacteridae-Actinomycetales-Micrococineae-Microbacteriaceae-Microbacterium

**CAUTION !** One genus only in the extracted sequences. No outgroup *may* be pertinent enough for a good phylogeny. You may need to increase the number of desired sequences or use a *more stringent database*.

**Phylogenetic tree analysis**

Proximal Cluster [**'Microbacterium\_mitrae T GQ351351', 'Microbacterium\_invictum T AM949677'**]

**ANALYSIS OF PATRISTIC DISTANCES**

**Absence of the closest sequence based on patristic distances *Microbacterium\_terricola T AB234025* from the proximal cluster.**

**Look at the tree and branch support**

On the basis of patristic Distances, the **closest TS** sequence is: *Microbacterium\_terricola T AB234025* AND is NOT in the proximal cluster

The closest sequence has not the same species name as the closest TS

No statistics available for patristic distances between members of the species of the closest sequence

Remark: the patristic distance to *Microbacterium\_terricola T AB234025* is in the 75th percentile of the *Microbacterium* genus inter-species patristic distances : the sequence may correspond to a member of this genus

The closest sequence based on patristic distances (*Microbacterium\_terricola T AB234025*) is NOT the FIRST BLAST hit.

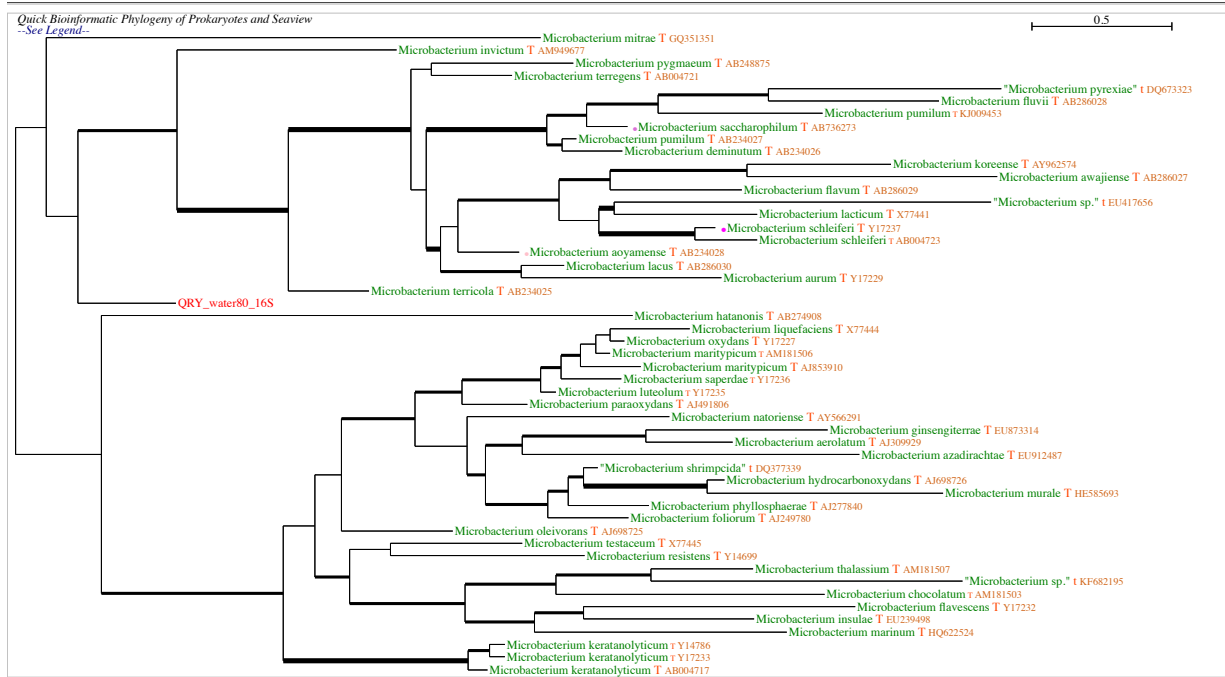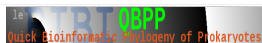

[in short](#)

[How-to](#)

[Cite](#)

[Tests sets](#)

[Databases](#)

[Contact us](#)

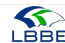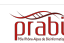

## lebibi Quick BioInformatic Phylogeny of Prokaryotes

### Summary of the methods and database used during this session

Analysis Extraction of similar sequences for ingroup sequences: Query

There are 44 sequences in your batch

BLAST using the procaryota\_SSU-rDNA-16S\_TS-stringent database. Trying to extract 50 sequences with expect lower than 0.1

ALIGNMENT using mafft Options : speed oriented

BMGE use for alignment optimization Options :defaults parameters

TREE : phylogenetic tree using fasttree

Evolution model GTR -gamma

## RESULTS



**Results**

**Query data**

Database: **procaryota\_SSU-rDNA-16S\_TS-stringent**

Note: The use of the stringent database (all the GenBank sequences for a given species) may lead to errors due to the low quality identification of some sequences, a careful analysis is necessary.

Original name of the query (from fasta) : **QRY\_water37\_16S**, leBiBI ref : ppqIvwPtL

**Sequence composition**

Length of Query sequence is : **1279**

Nucleotide Composition 317 A - 244 T - 306 C - 412 G - **0 N 0.0 % Gaps % =0.0**

GC%=0.56

**Quality of the BLAST analysis**

The number of Blast hits is **OK**

All is OK, the best BLAST hit length (**1279**) is =100.% of the query length

**Biodiversity level**

All extracted sequences appear to belong to Bacteria and their lowest shared taxon is: Bacteria-Actinobacteria-Actinobacteridae-Actinomycetales-Micrococineae-Microbacteriaceae-Microbacterium

**CAUTION!** One genus only in the extracted sequences. No outgroup *may* be pertinent enough for a good phylogeny. You may need to increase the number of desired sequences or use a *more stringent database*.

**Phylogenetic tree analysis**

Proximal Cluster ['**Microbacterium\_lacticum T X77441**']

**ANALYSIS OF PATRISTIC DISTANCES**

Microbacterium\_lacticum T X77441 is the closest sequence based on patristic distances

On the basis of patristic Distances, the **closest** sequence is: Microbacterium\_lacticum T X77441 AND is in the proximal cluster

No statistics available for patristic distances between members of the species of the closest sequence

Remark: the patristic distance to Microbacterium\_lacticum T X77441 is in the 75th percentile of the Microbacterium genus inter-species patristic distances : the sequence may correspond to a member of this genus

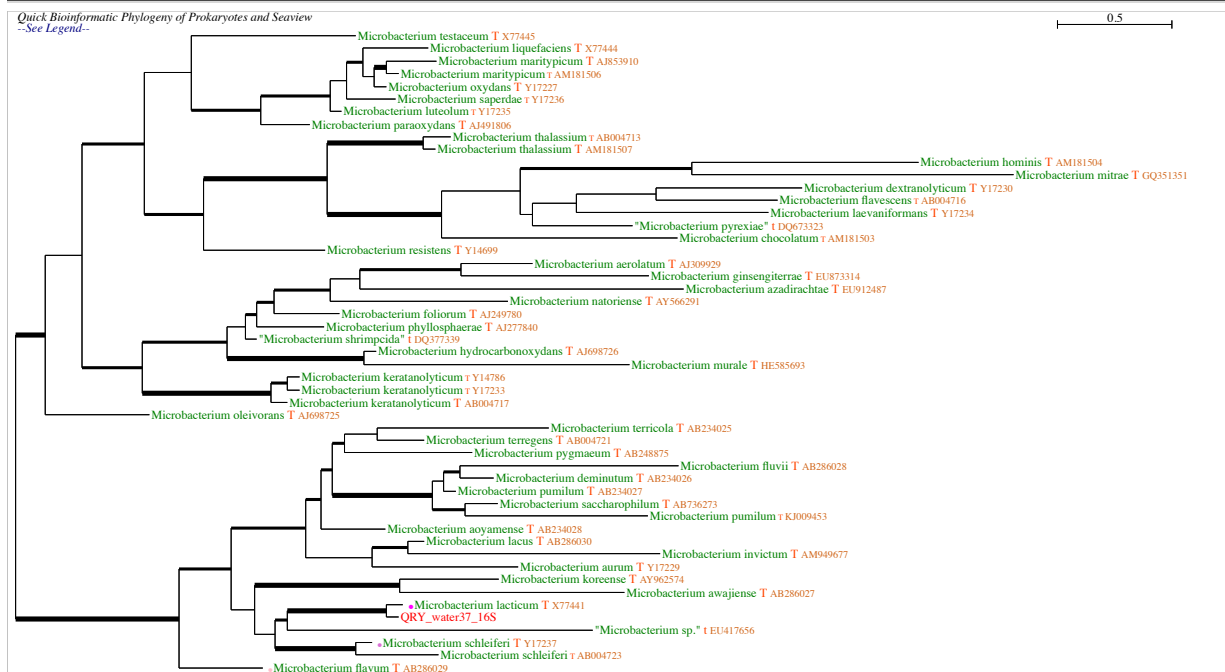

[in short](#)

[How-to](#)

[Cite](#)

[Tests sets](#)

[Databases](#)

[Contact us](#)



**lebibi Quick BioInformatic Phylogeny of Prokaryotes**

**Summary of the methods and database used during this session**

Analysis Extraction of similar sequences for ingroup sequences: Query

There are 44 sequences in your batch

BLAST using the procaryota\_SSU-rDNA-16S\_TS-stringent database. Trying to extract 50 sequences with expect lower than 0.1

ALIGNMENT using mafft Options : speed oriented

BMGE use for alignment optimization Options : defaults parameters

TREE : phylogenetic tree using fasttree

Evolution model GTR -gamma

**RESULTS**

**Results**

**Query data**

Database: **procaryota\_SSU-rDNA-16S\_TS-stringent**

Note: The use of the stringent database (all the GenBank sequences for a given species) may lead to errors due to the low quality identification of some sequences, a careful analysis is necessary.

Original name of the query (from fasta) : **QRY\_water81\_16S**, leBiBI ref : ppqIvwPtL

**Sequence composition**

Length of Query sequence is : **1233**

Nucleotide Composition 292 A - 244 T - 296 C - 401 G - **0 N 0.0 % Gaps % =0.0**

GC%=0.56

**Quality of the BLAST analysis**

The number of Blast hits is **OK**

All is OK, the best BLAST hit length (**1233**) is =100.% of the query length

**Biodiversity level**

All extracted sequences appear to belong to Bacteria and their lowest shared taxon is: Bacteria-Proteobacteria-Alphaproteobacteria-Rhizobiales-Methylobacteriaceae-Methylobacterium **CAUTION!** One genus only in the extracted sequences. No outgroup *may* be pertinent enough for a good phylogeny. You may need to increase the number of desired sequences or use a *more stringent database*.

**Phylogenetic tree analysis**

Proximal Cluster ['Methylobacterium\_thiocyanatum T U58018', 'Methylobacterium\_rhodesianum T AB175643', 'Methylobacterium\_rhodesianum T AB175642']

**ANALYSIS OF PATRISTIC DISTANCES**

Methylobacterium\_rhodesianum T AB175643 is the closest sequence based on patristic distances

On the basis of patristic Distances, the **closest** sequence is: Methylobacterium\_rhodesianum T AB175643 AND is in the proximal cluster

No statistics available for patristic distances between members of the species of the closest sequence

Remark: the patristic distance to Methylobacterium\_rhodesianum T AB175643 is in the 75th percentile of the Methylobacterium genus inter-species patristic distances : the sequence may correspond to a member of this genus

The closest sequence based on patristic distances (Methylobacterium\_rhodesianum T AB175643) is NOT the FIRST BLAST hit.

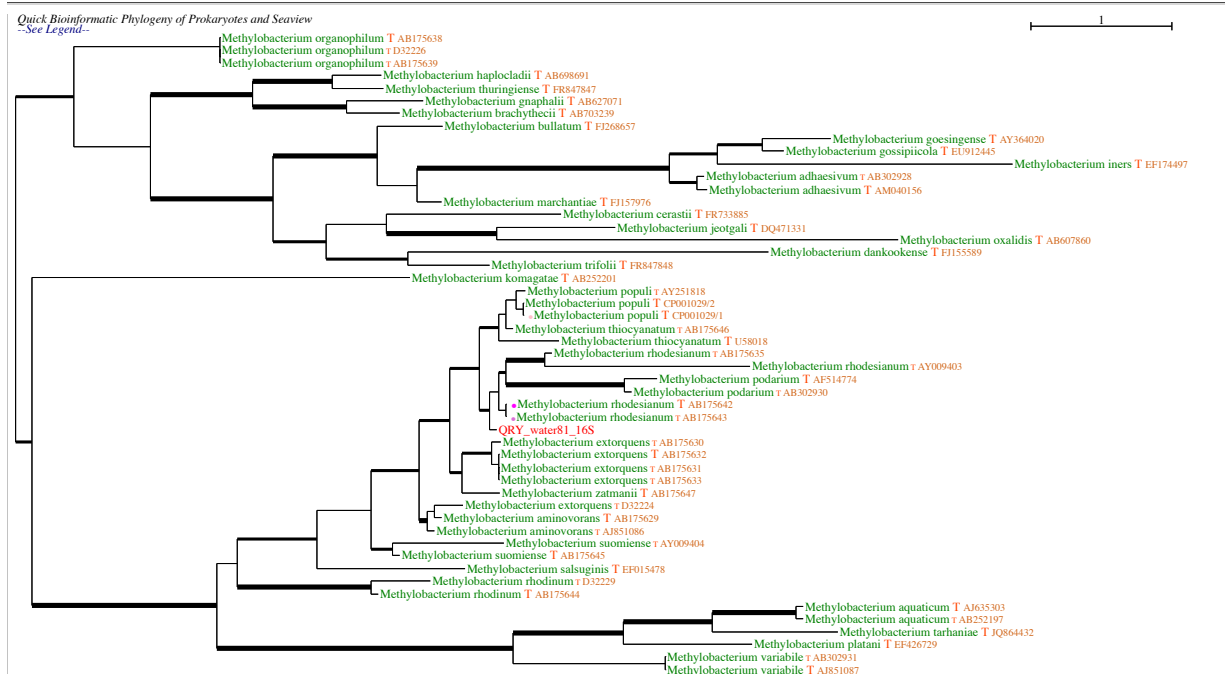

[Quick Bioinformatic Phylogeny of Prokaryotes](#) | 
 [in short](#) | 
 [How-to](#) | 
 [Cite](#) | 
 [Tests sets](#) | 
 [Databases](#) | 
 [Contact us](#) | 
 |

## lebibi Quick BioInformatic Phylogeny of Prokaryotes

### Summary of the methods and database used during this session

Analysis Extraction of similar sequences for ingroup sequences: Query  
 There are 44 sequences in your batch  
 BLAST using the procaryota\_SSU-rDNA-16S\_TS-stringent database. Trying to extract 50 sequences with expect lower than 0.1  
 ALIGNMENT using mafft Options : speed oriented  
 BMGE use for alignment optimization Options :defaults parameters  
 TREE : phylogenetic tree using fasttree  
 Evolution model GTR -gamma

## RESULTS

**Results**

**Query data**

Database: **procaryota\_SSU-rDNA-16S\_TS-stringent**

Note: The use of the stringent database (all the GenBank sequences for a given species) may lead to errors due to the low quality identification of some sequences, a careful analysis is necessary.

Original name of the query (from fasta): **QRY\_water82\_16S**, leBiBI ref : ppqIvwPtL

**Sequence composition**

Length of Query sequence is : **1268**

Nucleotide Composition 312 A - 243 T - 303 C - 410 G - **0 N 0.0 % Gaps % =0.0**

GC%=0.56

**Quality of the BLAST analysis**

The number of Blast hits is **OK**

All is OK, the best BLAST hit length (**1266**) is =99.8% of the query length

**Biodiversity level**

All extracted sequences appear to belong to Bacteria and their lowest shared taxon is: Bacteria-Actinobacteria-Actinobacteridae-Actinomycetales-Micrococineae-Microbacteriaceae-Microbacterium

**CAUTION!** One genus only in the extracted sequences. No outgroup *may* be pertinent enough for a good phylogeny. You may need to increase the number of desired sequences or use a *more stringent database*.

**Phylogenetic tree analysis**

Proximal Cluster ['**Microbacterium\_lacticum T X77441**']

**ANALYSIS OF PATRISTIC DISTANCES**

Microbacterium\_lacticum T X77441 is the closest sequence based on patristic distances

On the basis of patristic Distances, the **closest** sequence is: Microbacterium\_lacticum T X77441 AND is in the proximal cluster

No statistics available for patristic distances between members of the species of the closest sequence

Remark: the patristic distance to Microbacterium\_lacticum T X77441 is in the 75th percentile of the Microbacterium genus inter-species patristic distances : the sequence may correspond to a member of this genus

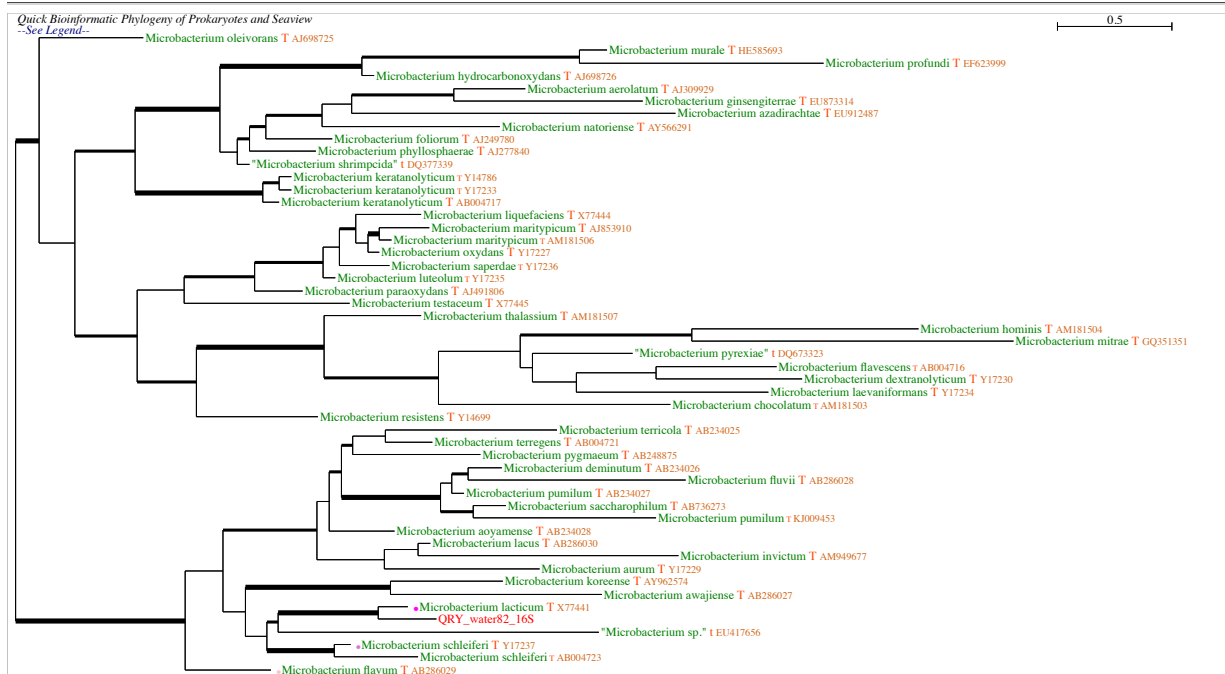

[in short](#)

[How-to](#)

[Cite](#)

[Tests sets](#)

[Databases](#)

[Contact us](#)



**lebibi Quick BioInformatic Phylogeny of Prokaryotes**

**Summary of the methods and database used during this session**

Analysis Extraction of similar sequences for ingroup sequences: Query

There are 44 sequences in your batch

BLAST using the procaryota\_SSU-rDNA-16S\_TS-stringent database. Trying to extract 50 sequences with expect lower than 0.1

ALIGNMENT using mafft Options : speed oriented

BMGE use for alignment optimization Options :defaults parameters

TREE : phylogenetic tree using fasttree

Evolution model GTR -gamma

**RESULTS**

**Results**

**Query data**

Database: **procaryota\_SSU-rDNA-16S\_TS-stringent**

Note: The use of the stringent database (all the GenBank sequences for a given species) may lead to errors due to the low quality identification of some sequences, a careful analysis is necessary.

Original name of the query (from fasta) : **QRY\_water83\_16S**. leBiBI ref : ppqIvwPtL

**Sequence composition**

Length of Query sequence is : **1268**

Nucleotide Composition 311 A - 242 T - 304 C - 411 G - **0 N 0.0 % Gaps % =0.0**  
GC%=0.56

**Quality of the BLAST analysis**

The number of Blast hits is **OK**

All is OK, the best BLAST hit length (**1266**) is =99.8% of the query length

**Biodiversity level**

All extracted sequences appear to belong to Bacteria and their lowest shared taxon is: Bacteria-Actinobacteria-Actinobacteridae-Actinomycetales-Micrococineae-Microbacteriaceae-Microbacterium

**CAUTION!** One genus only in the extracted sequences. No outgroup *may* be pertinent enough for a good phylogeny. You may need to increase the number of desired sequences or use a *more stringent database*.

**Phylogenetic tree analysis**

Proximal Cluster [**'Microbacterium\_lacticum T X77441'**]

**ANALYSIS OF PATRISTIC DISTANCES**

Microbacterium\_lacticum T X77441 is the closest sequence based on patristic distances

On the basis of patristic Distances, the **closest** sequence is: Microbacterium\_lacticum T X77441 AND is in the proximal cluster

No statistics available for patristic distances between members of the species of the closest sequence

Remark: the patristic distance to Microbacterium\_lacticum T X77441 is in the 75th percentile of the Microbacterium genus inter-species patristic distances : the sequence may correspond to a member of this genus

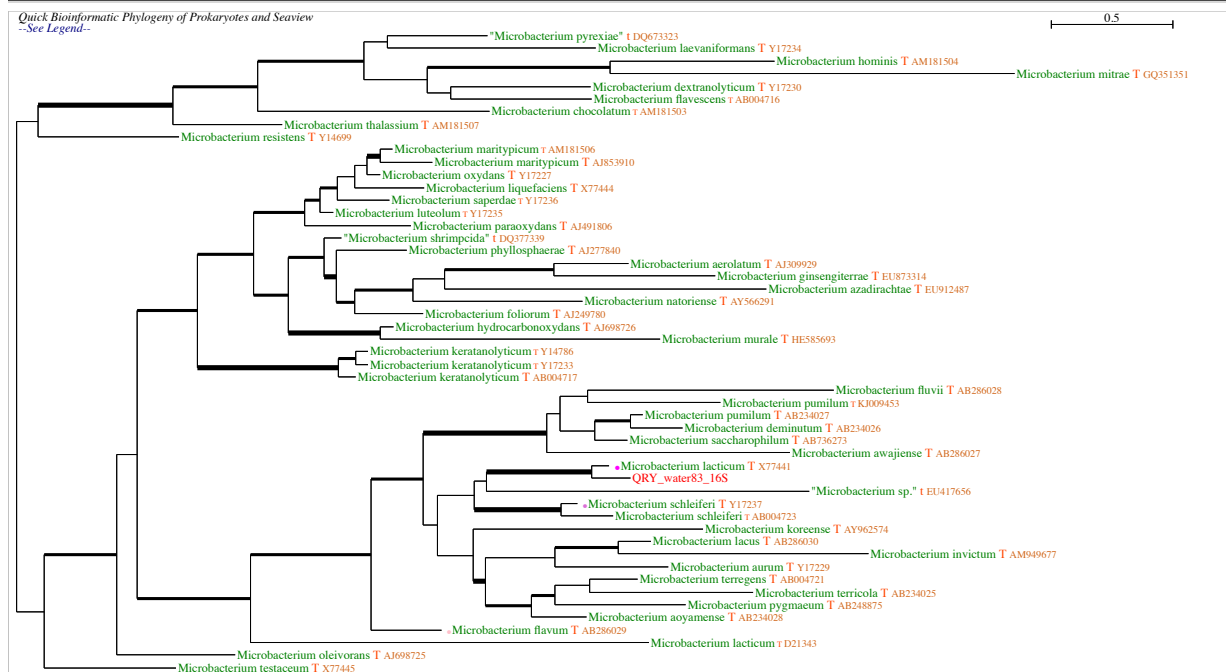

[in short](#)

[How-to](#)

[Cite](#)

[Tests sets](#)

[Databases](#)

[Contact us](#)



**lebibi Quick BioInformatic Phylogeny of Prokaryotes**

**Summary of the methods and database used during this session**

Analysis Extraction of similar sequences for ingroup sequences: Query

There are 44 sequences in your batch

BLAST using the procaryota\_SSU-rDNA-16S\_TS-stringent database. Trying to extract 50 sequences with expect lower than 0.1

ALIGNMENT using mafft Options : speed oriented

BMGE use for alignment optimization Options : defaults parameters

TREE : phylogenetic tree using fasttree

Evolution model GTR -gamma

**RESULTS**

**Results**

**Query data**

Database: **procaryota\_SSU-rDNA-16S\_TS-stringent**

Note: The use of the stringent database (all the GenBank sequences for a given species) may lead to errors due to the low quality identification of some sequences, a careful analysis is necessary.

Original name of the query (from fasta) : **QRY\_water84\_16S**, leBiBI ref : ppqIvwPtL

**Sequence composition**

Length of Query sequence is : **1231**

Nucleotide Composition 290 A - 244 T - 296 C - 401 G - **0 N 0.0 % Gaps % =0.0**

GC%=0.56

**Quality of the BLAST analysis**

The number of Blast hits is **OK**

All is OK, the best BLAST hit length (**1229**) is =99.8% of the query length

**Biodiversity level**

All extracted sequences appear to belong to Bacteria and their lowest shared taxon is: Bacteria-Proteobacteria-Alphaproteobacteria-Rhizobiales-Methylobacteriaceae-Methylobacterium **CAUTION!** One genus only in the extracted sequences. No outgroup *may* be pertinent enough for a good phylogeny. You may need to increase the number of desired sequences or use a *more stringent database*.

**Phylogenetic tree analysis**

Proximal Cluster ['Methylobacterium\_thiocyanatum T U58018', 'Methylobacterium\_rhodesianum T AB175643', 'Methylobacterium\_rhodesianum T AB175642']

**ANALYSIS OF PATRISTIC DISTANCES**

Methylobacterium\_rhodesianum T AB175643 is the closest sequence based on patristic distances

On the basis of patristic Distances, the **closest** sequence is: Methylobacterium\_rhodesianum T AB175643 AND is in the proximal cluster

No statistics available for patristic distances between members of the species of the closest sequence

Remark: the patristic distance to Methylobacterium\_rhodesianum T AB175643 is in the 75th percentile of the Methylobacterium genus inter-species patristic distances : the sequence may correspond to a member of this genus

The closest sequence based on patristic distances (Methylobacterium\_rhodesianum T AB175643) is **NOT** the FIRST BLAST hit.

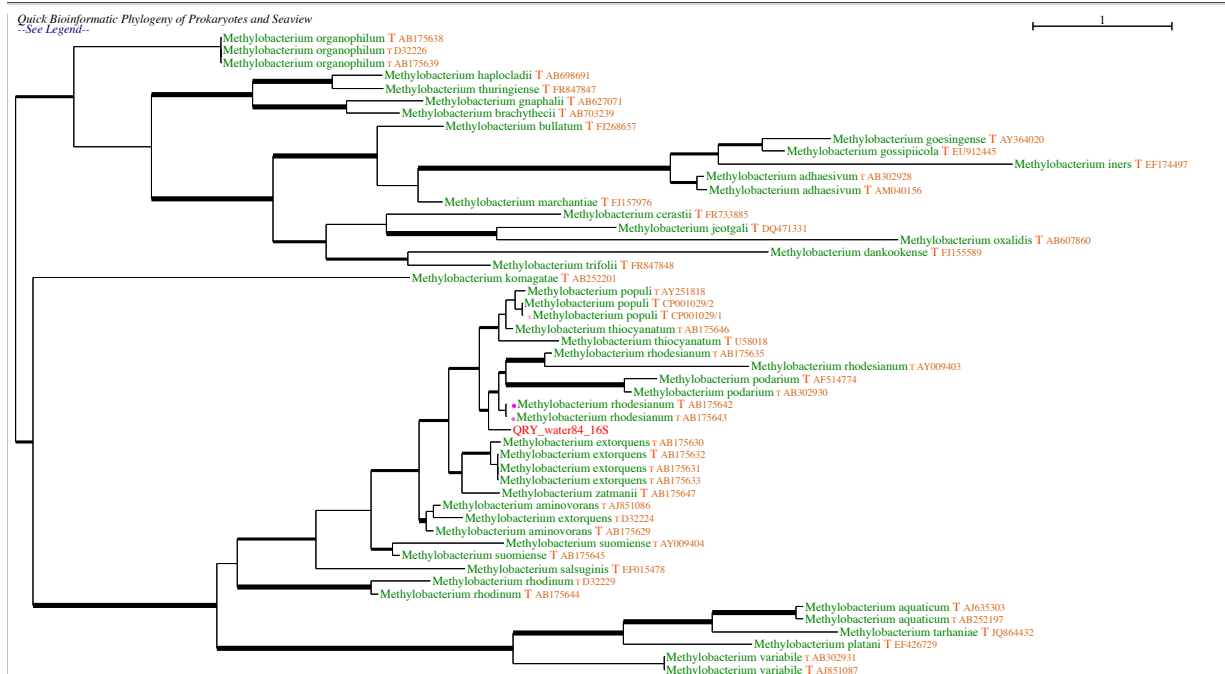

[Quick Bioinformatic Phylogeny of Prokaryotes](#) | 
 [in short](#) | 
 [How-to](#) | 
 [Cite](#) | 
 [Tests sets](#) | 
 [Databases](#) | 
 [Contact us](#) | 
 |

**lebibi Quick BioInformatic Phylogeny of Prokaryotes**

**Summary of the methods and database used during this session**

Analysis Extraction of similar sequences for ingroup sequences: Query  
 There are 44 sequences in your batch  
 BLAST using the procaryota\_SSU-rDNA-16S\_TS-stringent database. Trying to extract 50 sequences with expect lower than 0.1  
 ALIGNMENT using mafft Options : speed oriented  
 BMGE use for alignment optimization Options :defaults parameters  
 TREE : phylogenetic tree using fasttree  
 Evolution model GTR -gamma

**RESULTS**

**Results**

**Query data**

Database: **procaryota\_SSU-rDNA-16S\_TS-stringent**

Note: The use of the stringent database (all the GenBank sequences for a given species) may lead to errors due to the low quality identification of some sequences, a careful analysis is necessary.

Original name of the query (from fasta) : **QRY\_water85\_16S**. leBiBI ref : ppqIvwPtL

**Sequence composition**

Length of Query sequence is : **1231**

Nucleotide Composition 291 A - 244 T - 296 C - 400 G - **0 N 0.0 % Gaps % =0.0**

GC%=0.56

**Quality of the BLAST analysis**

The number of Blast hits is **OK**

All is OK, the best BLAST hit length (**1229**) is =99.8% of the query length

**Biodiversity level**

All extracted sequences appear to belong to Bacteria and their lowest shared taxon is: Bacteria-Proteobacteria-Alphaproteobacteria-Rhizobiales-Methylobacteriaceae-Methylobacterium **CAUTION!** One genus only in the extracted sequences. No outgroup *may* be pertinent enough for a good phylogeny. You may need to increase the number of desired sequences or use a *more stringent database*.

**Phylogenetic tree analysis**

Proximal Cluster ['Methylobacterium\_thiocyanatum T U58018', 'Methylobacterium\_rhodesianum T AB175643', 'Methylobacterium\_rhodesianum T AB175642']

**ANALYSIS OF PATRISTIC DISTANCES**

Methylobacterium\_rhodesianum T AB175643 is the closest sequence based on patristic distances

On the basis of patristic Distances, the **closest** sequence is: Methylobacterium\_rhodesianum T AB175643 AND is in the proximal cluster

No statistics available for patristic distances between members of the species of the closest sequence

Remark: the patristic distance to Methylobacterium\_rhodesianum T AB175643 is in the 75th percentile of the Methylobacterium genus inter-species patristic distances : the sequence may correspond to a member of this genus

The closest sequence based on patristic distances (Methylobacterium\_rhodesianum T AB175643) is **NOT** the FIRST BLAST hit.

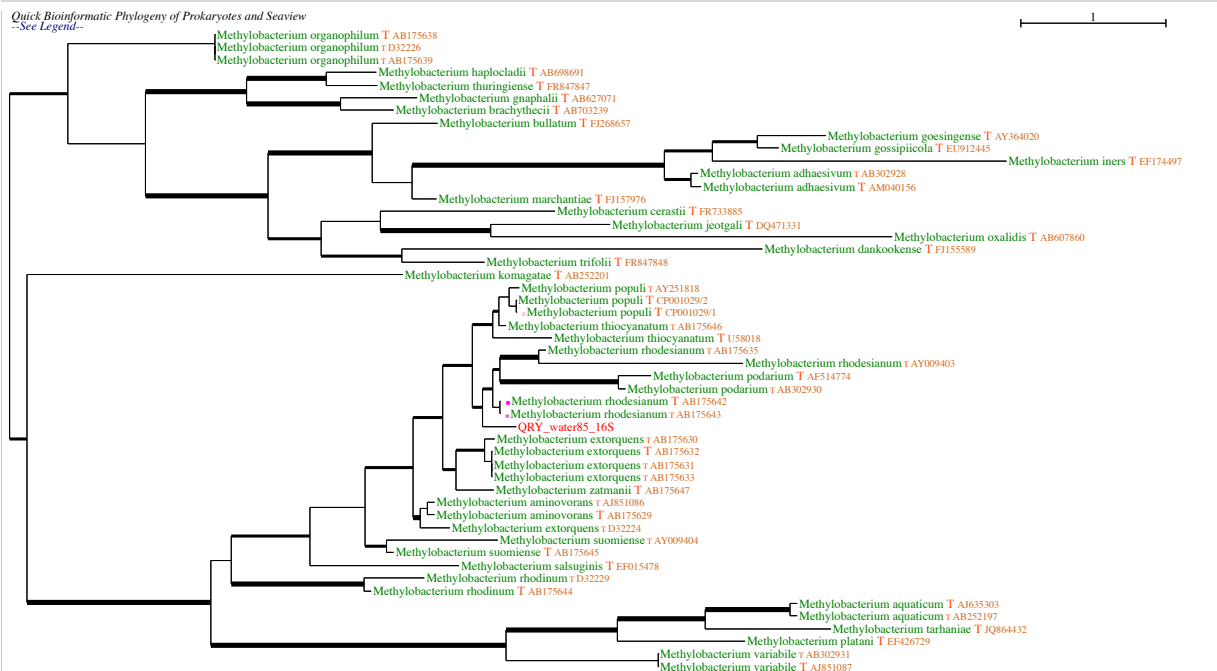

[Quick Bioinformatic Phylogeny of Prokaryotes](#) | 
 [in short](#) | 
 [How-to](#) | 
 [Cite](#) | 
 [Tests sets](#) | 
 [Databases](#) | 
 [Contact us](#) | 
  | 
 

**lebibi Quick BioInformatic Phylogeny of Prokaryotes**

**Summary of the methods and database used during this session**

Analysis Extraction of similar sequences for ingroup sequences: Query  
 There are 44 sequences in your batch  
 BLAST using the procaryota\_SSU-rDNA-16S\_TS-stringent database. Trying to extract 50 sequences with expect lower than 0.1  
 ALIGNMENT using mafft Options : speed oriented  
 BMGE use for alignment optimization Options :defaults parameters  
 TREE : phylogenetic tree using fasttree  
 Evolution model GTR -gamma

**RESULTS**

**Results****Query data**Database: **procaryota\_SSU-rDNA-16S\_TS-stringent**

Note: The use of the stringent database (all the GenBank sequences for a given species) may lead to errors due to the low quality identification of some sequences, a careful analysis is necessary.

Original name of the query (from fasta) : **QRY\_water38\_16S**, leBiBI ref : ppqIvwPtL**Sequence composition**Length of Query sequence is : **1270**Nucleotide Composition 314 A - 243 T - 303 C - 410 G - **0 N 0.0 % Gaps % =0.0**

GC%=0.56

**Quality of the BLAST analysis**The number of Blast hits is **OK**All is OK, the best BLAST hit length (**1270**) is =100.% of the query length**Biodiversity level**

All extracted sequences appear to belong to Bacteria and their lowest shared taxon is: Bacteria-Actinobacteria-Actinobacteridae-Actinomycetales-Micrococineae-Microbacteriaceae-Microbacterium

**CAUTION!** One genus only in the extracted sequences. No outgroup *may* be pertinent enough for a good phylogeny. You may need to increase the number of desired sequences or use a *more stringent database*.**Phylogenetic tree analysis**Proximal Cluster ['*Microbacterium flavum* T AB286029', '*Microbacterium lacticum* T X77441']**ANALYSIS OF PATRISTIC DISTANCES***Microbacterium lacticum* T X77441 is the closest sequence based on patristic distancesOn the basis of patristic Distances, the **closest** sequence is: *Microbacterium lacticum* T X77441 AND is in the proximal cluster

No statistics available for patristic distances between members of the species of the closest sequence

Remark: the patristic distance to *Microbacterium lacticum* T X77441 is in the 75th percentile of the *Microbacterium* genus inter-species patristic distances : the sequence may correspond to a member of this genus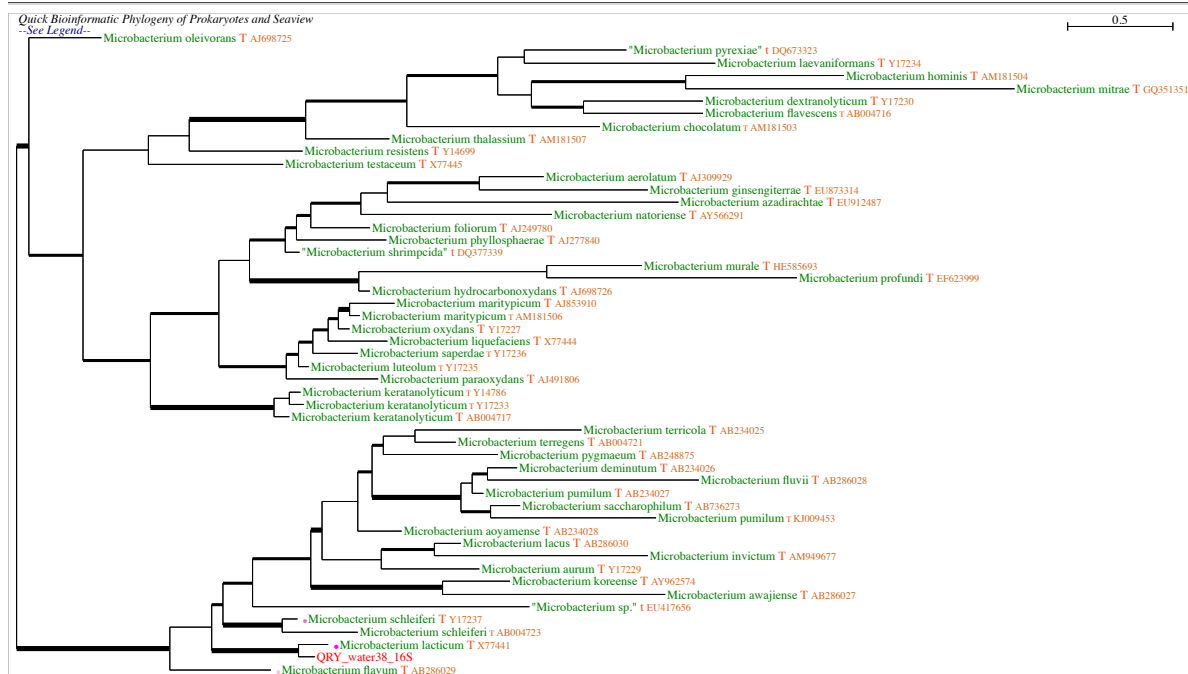[in short](#)[How-to](#)[Cite](#)[Tests sets](#)[Databases](#)[Contact us](#)**lebib Quick BioInformatic Phylogeny of Prokaryotes****Summary of the methods and database used during this session**

Analysis Extraction of similar sequences for ingroup sequences: Query

There are 44 sequences in your batch

BLAST using the procaryota\_SSU-rDNA-16S\_TS-stringent database. Trying to extract 50 sequences with expect lower than 0.1

ALIGNMENT using mafft Options : speed oriented

BMGE use for alignment optimization Options :defaults parameters

TREE : phylogenetic tree using fasttree

Evolution model GTR -gamma

**RESULTS**

**Results**

**Query data**

Database: **procaryota\_SSU-rDNA-16S\_TS-stringent**

Note: The use of the stringent database (all the GenBank sequences for a given species) may lead to errors due to the low quality identification of some sequences, a careful analysis is necessary.

Original name of the query (from fasta) : **QRY\_water39\_16S**, leBiBI ref : ppqIvwPtL

**Sequence composition**

Length of Query sequence is : **1278**

Nucleotide Composition 318 A - 246 T - 303 C - 411 G - **0 N 0.0 % Gaps % =0.0**  
GC%=0.55

**Quality of the BLAST analysis**

The number of Blast hits is **OK**

All is OK, the best BLAST hit length (**1273**) is =99.6% of the query length

**Biodiversity level**

All extracted sequences appear to belong to Bacteria and their lowest shared taxon is: Bacteria-Actinobacteria-Actinobacteridae-Actinomycetales-Micrococineae-Microbacteriaceae  
More than one genus in the extracted sequences. An outgroup will be present in the tree.

**Phylogenetic tree analysis**

Proximal Cluster [**'Microbacterium\_hatanonis T AB274908', 'Microbacterium\_aurum T Y17229'**]

**ANALYSIS OF PATRISTIC DISTANCES**

Microbacterium\_aurum T Y17229 is the closest sequence based on patristic distances

On the basis of patristic Distances, the **closest** sequence is: Microbacterium\_aurum T Y17229 AND is in the proximal cluster

No statistics available for patristic distances between members of the species of the closest sequence

Remark: the patristic distance to Microbacterium\_aurum T Y17229 is in the 75th percentile of the Microbacterium genus inter-species patristic distances : the sequence may correspond to a member of this genus

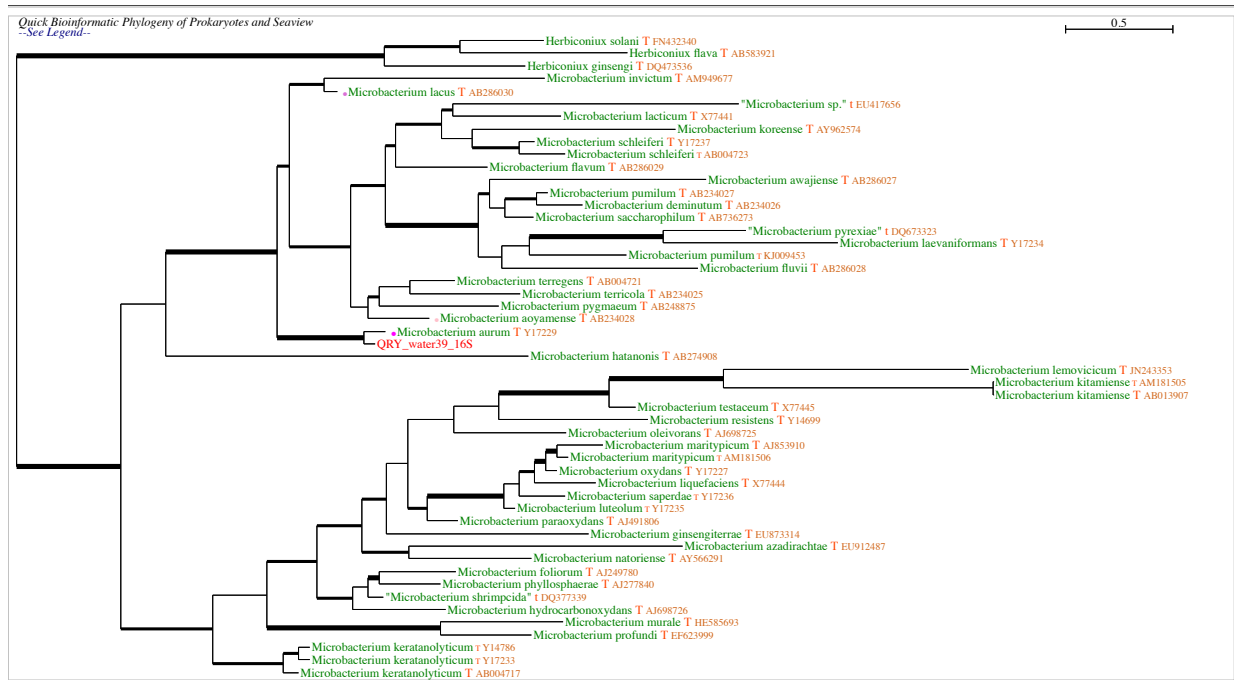

[Quick BioInformatic Phylogeny of Prokaryotes](#) | 
 [in short](#) | 
 [How-to](#) | 
 [Cite](#) | 
 [Tests sets](#) | 
 [Databases](#) | 
 [Contact us](#) | 
  | 
 

**lebibi Quick BioInformatic Phylogeny of Prokaryotes**

**Summary of the methods and database used during this session**

Analysis Extraction of similar sequences for ingroup sequences: Query  
 There are 44 sequences in your batch  
 BLAST using the procaryota\_SSU-rDNA-16S\_TS-stringent database. Trying to extract 50 sequences with expect lower than 0.1  
 ALIGNMENT using mafft Options : speed oriented  
 BMGE use for alignment optimization Options :defaults parameters  
 TREE : phylogenetic tree using fasttree  
 Evolution model GTR -gamma

**RESULTS**



**Results**

**Query data**

Database: **procaryota\_SSU-rDNA-16S\_TS-stringent**

Note: The use of the stringent database (all the GenBank sequences for a given species) may lead to errors due to the low quality identification of some sequences, a careful analysis is necessary.

Original name of the query (from fasta) : **QRY\_water40\_16S**. leBiBI ref : ppqIvwPtL

**Sequence composition**

Length of Query sequence is : **1267**

Nucleotide Composition 288 A - 258 T - 292 C - 428 G - **0 N 0.0 % Gaps % =1.0**  
GC%=0.56

**Quality of the BLAST analysis**

The number of Blast hits is **OK**

All is OK, the best BLAST hit length (**1260**) is =99.4% of the query length

**Biodiversity level**

All extracted sequences appear to belong to Bacteria and their lowest shared taxon is: Bacteria-Actinobacteria-Actinobacteridae-Actinomycetales-Micrococccineae-Micrococccaceae  
More than one genus in the extracted sequences. An outgroup will be present in the tree.

**Phylogenetic tree analysis**

Proximal Cluster ['*Micrococcus\_luteus* T AM992194', '*Micrococcus\_aloeverae* T KF524364']

**ANALYSIS OF PATRISTIC DISTANCES**

*Micrococcus\_aloeverae* T KF524364 is the closest sequence based on patristic distances

On the basis of patristic Distances, the **closest** sequence is: *Micrococcus\_aloeverae* T KF524364 AND is in the proximal cluster

No statistics available for patristic distances between members of the species of the closest sequence

Remark: the patristic distance to *Micrococcus\_aloeverae* T KF524364 is in the 75th percentile of the *Micrococcus* genus inter-species patristic distances : the sequence may correspond to a member of this genus

The closest sequence based on patristic distances (*Micrococcus\_aloeverae* T KF524364) is NOT the FIRST BLAST hit.

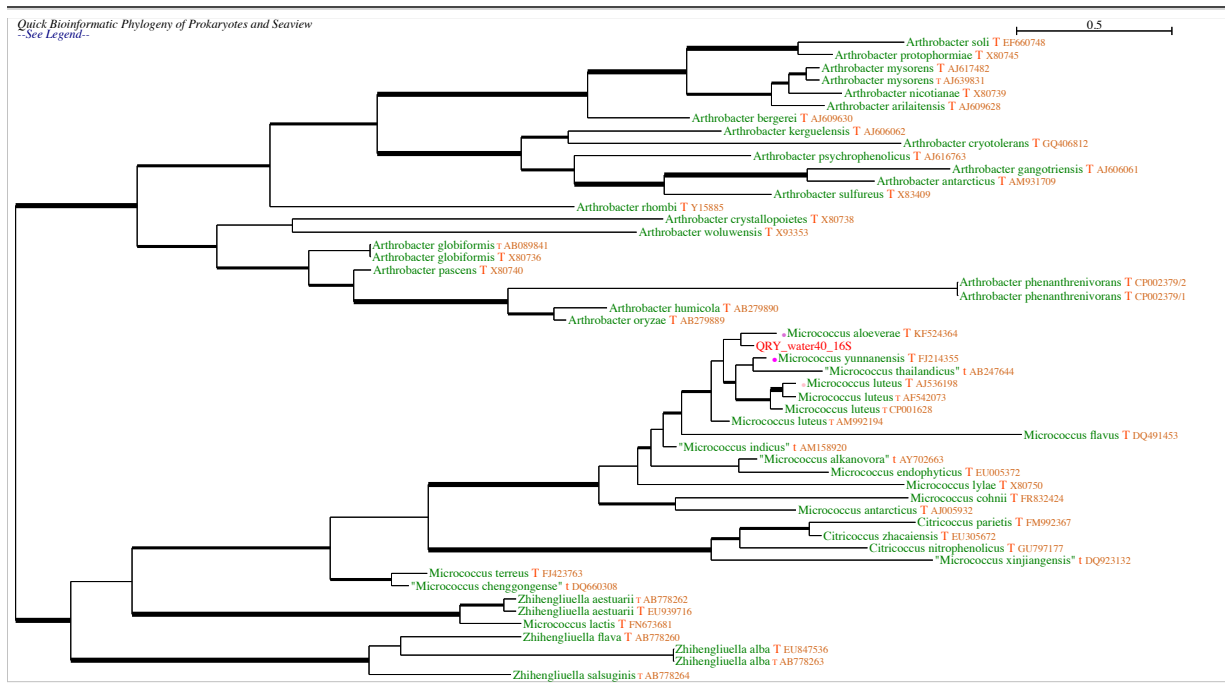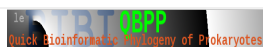

[in short](#)

[How-to](#)

[Cite](#)

[Tests sets](#)

[Databases](#)

[Contact us](#)

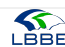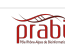

**lebibi Quick BioInformatic Phylogeny of Prokaryotes**

**Summary of the methods and database used during this session**

Analysis Extraction of similar sequences for ingroup sequences: Query

There are 44 sequences in your batch

BLAST using the procaryota\_SSU-rDNA-16S\_TS-stringent database. Trying to extract 50 sequences with expect lower than 0.1

ALIGNMENT using mafft Options : speed oriented

BMGE use for alignment optimization Options :defaults parameters

TREE : phylogenetic tree using fasttree

Evolution model GTR -gamma

**RESULTS**

**Results**

**Query data**

Database: **procaryota\_SSU-rDNA-16S\_TS-stringent**

Note: The use of the stringent database (all the GenBank sequences for a given species) may lead to errors due to the low quality identification of some sequences, a careful analysis is necessary.

Original name of the query (from fasta) : **QRY\_water41\_16S**, leBiBI ref : ppqIvwPtL

**Sequence composition**

Length of Query sequence is : **1278**

Nucleotide Composition 318 A - 246 T - 303 C - 411 G - **0 N 0.0 % Gaps % =0.0**

GC%=0.55

**Quality of the BLAST analysis**

The number of Blast hits is **OK**

All is OK, the best BLAST hit length (**1273**) is =99.6% of the query length

**Biodiversity level**

All extracted sequences appear to belong to Bacteria and their lowest shared taxon is: Bacteria-Actinobacteria-Actinobacteridae-Actinomycetales-Micrococccineae-Microbacteriaceae  
More than one genus in the extracted sequences. An outgroup will be present in the tree.

**Phylogenetic tree analysis**

Proximal Cluster [**'Microbacterium\_hatanonis T AB274908', 'Microbacterium\_aurum T Y17229'**]

**ANALYSIS OF PATRISTIC DISTANCES**

Microbacterium\_aurum T Y17229 is the closest sequence based on patristic distances

On the basis of patristic Distances, the **closest** sequence is: Microbacterium\_aurum T Y17229 AND is in the proximal cluster

No statistics available for patristic distances between members of the species of the closest sequence

Remark: the patristic distance to Microbacterium\_aurum T Y17229 is in the 75th percentile of the Microbacterium genus inter-species patristic distances : the sequence may correspond to a member of this genus

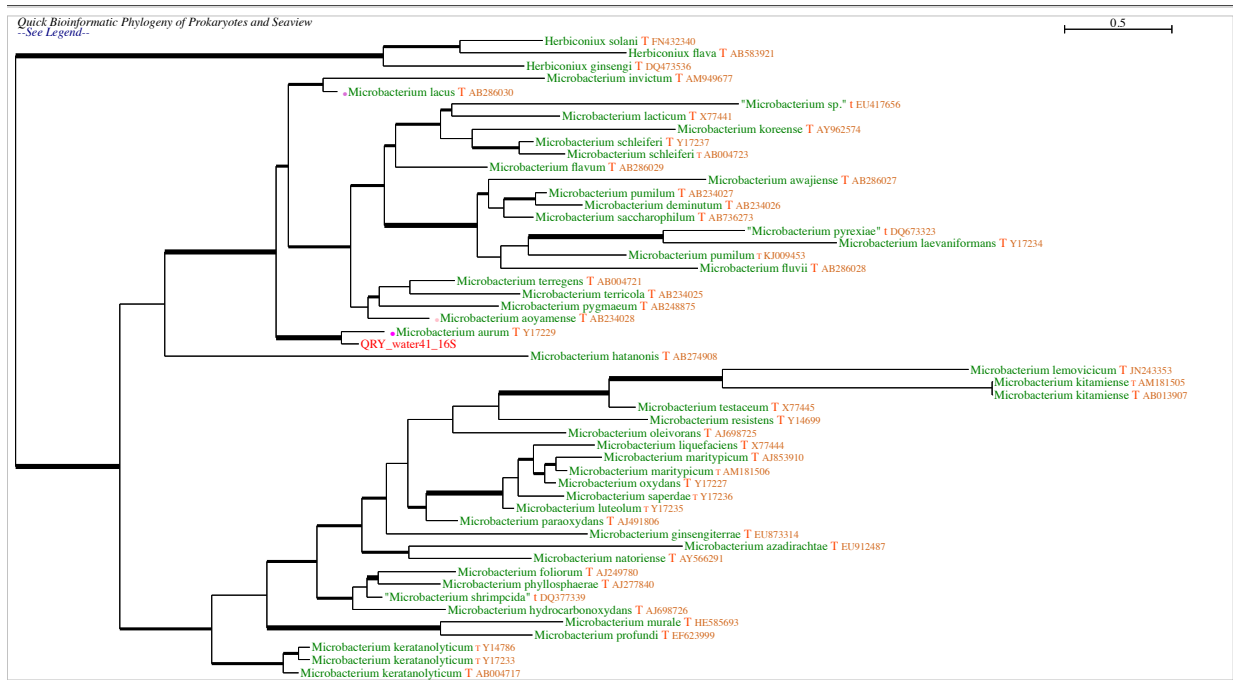

[in short](#)
[How-to](#)
[Cite](#)
[Tests sets](#)
[Databases](#)
[Contact us](#)

**lebibi Quick BioInformatic Phylogeny of Prokaryotes**

**Summary of the methods and database used during this session**

Analysis Extraction of similar sequences for ingroup sequences: Query

There are 44 sequences in your batch

BLAST using the procaryota\_SSU-rDNA-16S\_TS-stringent database. Trying to extract 50 sequences with expect lower than 0.1

ALIGNMENT using mafft Options : speed oriented

BMGE use for alignment optimization Options :defaults parameters

TREE : phylogenetic tree using fasttree

Evolution model GTR -gamma

**RESULTS**

**Results****Query data**Database: **procaryota\_SSU-rDNA-16S\_TS-stringent**

Note: The use of the stringent database (all the GenBank sequences for a given species) may lead to errors due to the low quality identification of some sequences, a careful analysis is necessary.

Original name of the query (from fasta) : **QRY\_water42\_16S**. leBiBI ref : ppqIvwPtL**Sequence composition**Length of Query sequence is : **1280**Nucleotide Composition 316 A - 244 T - 307 C - 413 G - **0 N 0.0 % Gaps % =0.0**

GC%=0.56

**Quality of the BLAST analysis**The number of Blast hits is **OK**All is OK, the best BLAST hit length (**1280**) is =100.% of the query length**Biodiversity level**

All extracted sequences appear to belong to Bacteria and their lowest shared taxon is: Bacteria-Actinobacteria-Actinobacteridae-Actinomycetales-Micrococineae-Microbacteriaceae-Microbacterium

**CAUTION!** One genus only in the extracted sequences. No outgroup *may* be pertinent enough for a good phylogeny. You may need to increase the number of desired sequences or use a *more stringent database*.**Phylogenetic tree analysis**Proximal Cluster ['*Microbacterium\_lacticum* T X77441']**ANALYSIS OF PATRISTIC DISTANCES***Microbacterium\_lacticum* T X77441 is the closest sequence based on patristic distancesOn the basis of patristic Distances, the **closest** sequence is: *Microbacterium\_lacticum* T X77441 AND is in the proximal cluster

No statistics available for patristic distances between members of the species of the closest sequence

Remark: the patristic distance to *Microbacterium\_lacticum* T X77441 is in the 75th percentile of the *Microbacterium* genus inter-species patristic distances : the sequence may correspond to a member of this genus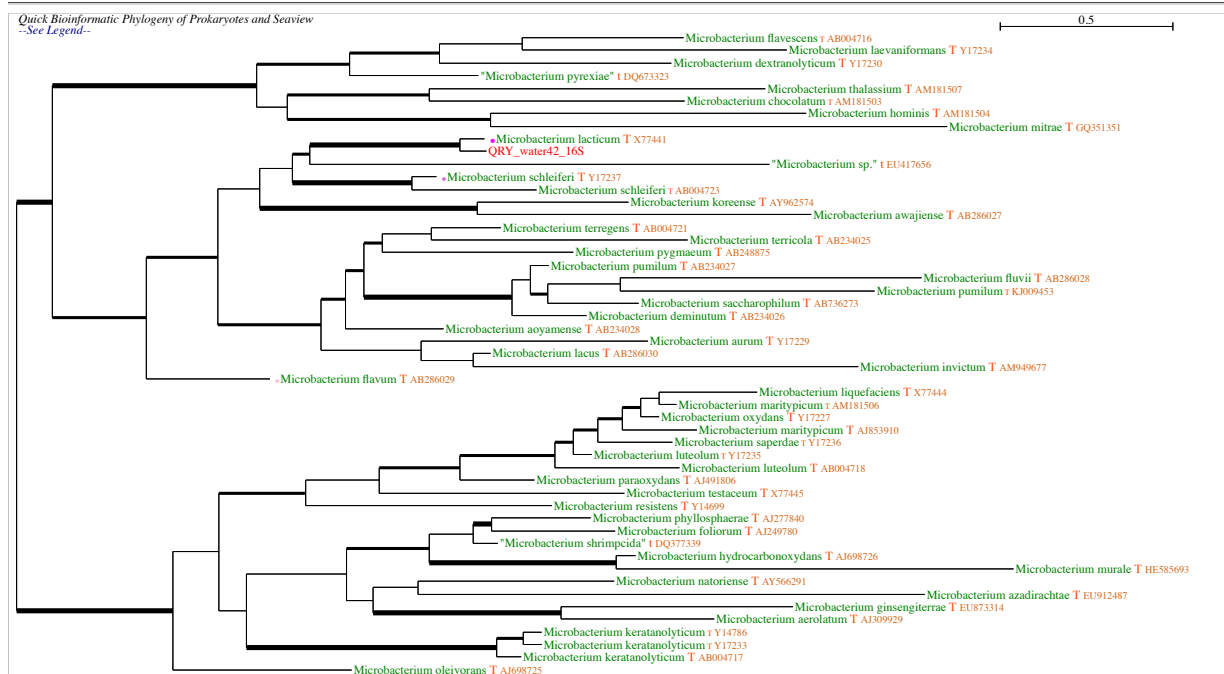[in short](#)[How-to](#)[Cite](#)[Tests sets](#)[Databases](#)[Contact us](#)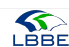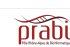**lebib Quick BioInformatic Phylogeny of Prokaryotes****Summary of the methods and database used during this session**

Analysis Extraction of similar sequences for ingroup sequences: Query

There are 44 sequences in your batch

BLAST using the procaryota\_SSU-rDNA-16S\_TS-stringent database. Trying to extract 50 sequences with expect lower than 0.1

ALIGNMENT using mafft Options : speed oriented

BMGE use for alignment optimization Options : defaults parameters

TREE : phylogenetic tree using fasttree

Evolution model GTR -gamma

**RESULTS**

**Results**

**Query data**

Database: **procaryota\_SSU-rDNA-16S\_TS-stringent**

Note: The use of the stringent database (all the GenBank sequences for a given species) may lead to errors due to the low quality identification of some sequences, a careful analysis is necessary.

Original name of the query (from fasta) : **QRY\_water43\_16S**, leBiBI ref : ppqIvwPtL

**Sequence composition**

Length of Query sequence is : **1269**

Nucleotide Composition 312 A - 242 T - 304 C - 411 G - **0 N 0.0 % Gaps % =0.0**

GC%=0.56

**Quality of the BLAST analysis**

The number of Blast hits is **OK**

All is OK, the best BLAST hit length (**1269**) is =100.% of the query length

**Biodiversity level**

All extracted sequences appear to belong to Bacteria and their lowest shared taxon is: Bacteria-Actinobacteria-Actinobacteridae-Actinomycetales-Micrococccineae-Microbacteriaceae-Microbacterium

**CAUTION!** One genus only in the extracted sequences. No outgroup *may* be pertinent enough for a good phylogeny. You may need to increase the number of desired sequences or use a *more stringent database*.

**Phylogenetic tree analysis**

Proximal Cluster [**'Microbacterium\_lacticum T X77441'**]

**ANALYSIS OF PATRISTIC DISTANCES**

Microbacterium\_lacticum T X77441 is the closest sequence based on patristic distances

On the basis of patristic Distances, the **closest** sequence is: Microbacterium\_lacticum T X77441 AND is in the proximal cluster

No statistics available for patristic distances between members of the species of the closest sequence

Remark: the patristic distance to Microbacterium\_lacticum T X77441 is in the 75th percentile of the Microbacterium genus inter-species patristic distances : the sequence may correspond to a member of this genus

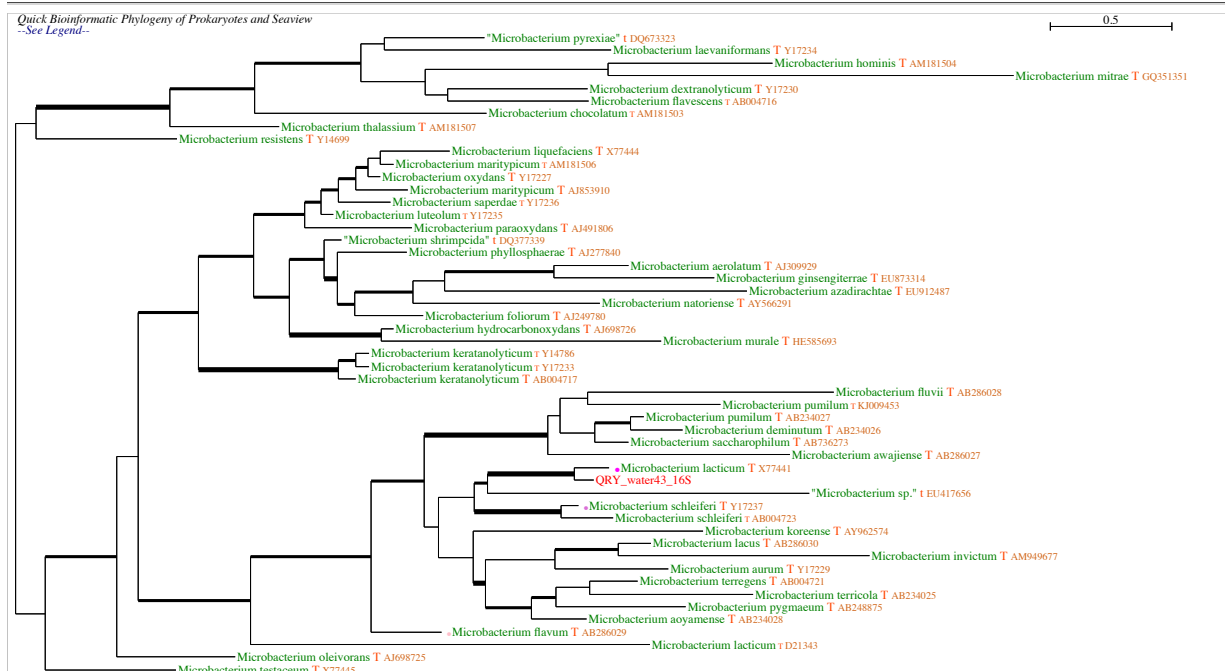

[Quick Bioinformatic Phylogeny of Prokaryotes](#) | 
 [in short](#) | 
 [How-to](#) | 
 [Cite](#) | 
 [Tests sets](#) | 
 [Databases](#) | 
 [Contact us](#) | 
 |

**lebibi Quick BioInformatic Phylogeny of Prokaryotes**

**Summary of the methods and database used during this session**

Analysis Extraction of similar sequences for ingroup sequences: Query  
 There are 44 sequences in your batch  
 BLAST using the procaryota\_SSU-rDNA-16S\_TS-stringent database. Trying to extract 50 sequences with expect lower than 0.1  
 ALIGNMENT using mafft Options : speed oriented  
 BMGE use for alignment optimization Options : defaults parameters  
 TREE : phylogenetic tree using fasttree  
 Evolution model GTR -gamma

**RESULTS**
